# Supplementary material for: Cancer related-genes enriched in peripheral blood mononuclear cells (PBMCs) of COVID-19 patients. a bioinformatics study
Source: Research Square preprint supplement (doi:10.21203/rs.3.rs-1894265/v1), 2022-08-02
Supplement: Supplementary file 1 [file c6e589f3e2b7a664a6023a06.xlsx]

## Sheet: KEGG results for UP genes
ID	Description	p.adjust	geneID	Count
hsa04110	Cell cycle	2.83126e-12	891/983/4998/990/890/9133/8318/993/9700/8900/5347/1111/1869/991/699/701/7272	17
hsa05203	Viral carcinogenesis	0.000149599	983/8345/890/5610/8900/8365/1111/8343/3017/991/8339/8348	12
hsa04218	Cellular senescence	0.000348596	891/2305/983/890/9133/993/8900/1111/1869/4605	10
hsa04914	Progesterone-mediated oocyte maturation	0.000517905	891/983/890/9133/993/8900/5347/699	8
hsa04115	p53 signaling pathway	0.00390278	891/983/51512/9133/1111/6241	6
hsa04613	Neutrophil extracellular trap formation	0.00531306	8345/8365/8343/3017/4353/820/566/8339/8348	9
hsa05160	Hepatitis C	0.00627719	4938/5610/4939/4599/1869/4940/3434/91543	8
hsa04114	Oocyte meiosis	0.00988275	891/983/9133/9700/5347/991/699	7
hsa05034	Alcoholism	0.0155477	4128/8345/8365/8343/3017/4129/8339/8348	8
hsa05169	Epstein-Barr virus infection	0.0229275	4938/890/5610/4939/8900/1869/4940/8819	8
hsa05164	Influenza A	0.0337552	4938/5610/4939/4599/64135/4940/91543	7
hsa05166	Human T-cell leukemia virus 1 infection	0.0344115	890/9133/9700/8900/1111/1869/991/701	8
hsa05322	Systemic lupus erythematosus	0.0397194	8345/8365/8343/3017/8339/8348	6
hsa05162	Measles	0.0410464	4938/5610/4939/4599/64135/4940	6
hsa05202	Transcriptional misregulation in cancer	0.0468332	2078/51513/890/8900/1669/4353/1668	7

## Sheet: GO results for UP genes
ONTOLOGY	ID	Description	pvalue	qvalue	geneID	Count
BP	GO:0140014	mitotic nuclear division	1.92438e-20	4.1992e-17	TPX2/CCNB1/ANLN/BIRC5/CDC6/AURKB/KIF4A/HASPIN/ZWINT/CDCA5/DLGAP5/MKI67/CAV2/ESPL1/PLK1/CHEK1/KIF18B/KIFC1/MYBL2/CDC20/BUB1/TRIP13/UBE2C/BUB1B/TTK/NCAPG/CENPF	27
BP	GO:0000280	nuclear division	1.45188e-18	1.58408e-15	TPX2/CCNB1/ANLN/BIRC5/CDC6/AURKB/KIF4A/HASPIN/ZWINT/CDCA5/DLGAP5/MKI67/CAV2/ESPL1/CCNA1/PLK1/CHEK1/KIF18B/KIFC1/MYBL2/CDC20/BUB1/TRIP13/UBE2C/TOP2A/BUB1B/RAD51/TTK/NCAPG/CENPF	30
BP	GO:0048285	organelle fission	2.39757e-18	1.74392e-15	TPX2/CCNB1/ANLN/BIRC5/CDC6/AURKB/KIF4A/HASPIN/ZWINT/CDCA5/DLGAP5/MKI67/MX1/CAV2/ESPL1/CCNA1/PLK1/CHEK1/KIF18B/KIFC1/MYBL2/CDC20/BUB1/TRIP13/UBE2C/TOP2A/BUB1B/RAD51/TTK/NCAPG/CENPF	31
BP	GO:0000075	cell cycle checkpoint	6.24732e-18	3.40808e-15	CCNB1/CDK1/ORC1/CDC6/AURKB/ZWINT/GTSE1/E2F7/CDC45/CLSPN/E2F8/PLK1/CHEK1/E2F1/TICRR/CDC20/BUB1/TRIP13/TOP2A/BUB1B/DTL/TTK/CENPF	23
BP	GO:0007059	chromosome segregation	3.49867e-17	1.52689e-14	CCNB1/BIRC5/CDC6/AURKB/KIF4A/HASPIN/ZWINT/CDCA5/DLGAP5/MKI67/CDCA2/ESPL1/PLK1/KIF18B/KIFC1/CDC20/BUB1/SKA1/TRIP13/TOP2A/SPC25/BUB1B/HJURP/TTK/NCAPG/CENPF	26
BP	GO:0007093	mitotic cell cycle checkpoint	7.81846e-17	2.84345e-14	CCNB1/CDK1/ORC1/CDC6/AURKB/ZWINT/GTSE1/E2F7/CLSPN/E2F8/PLK1/E2F1/TICRR/CDC20/BUB1/TRIP13/TOP2A/BUB1B/TTK/CENPF	20
BP	GO:0000070	mitotic sister chromatid segregation	2.36474e-16	7.3716e-14	CCNB1/CDC6/AURKB/KIF4A/HASPIN/ZWINT/CDCA5/DLGAP5/ESPL1/PLK1/KIF18B/KIFC1/CDC20/BUB1/TRIP13/BUB1B/TTK/NCAPG/CENPF	19
BP	GO:0000819	sister chromatid segregation	1.14301e-15	2.76201e-13	CCNB1/CDC6/AURKB/KIF4A/HASPIN/ZWINT/CDCA5/DLGAP5/ESPL1/PLK1/KIF18B/KIFC1/CDC20/BUB1/TRIP13/TOP2A/BUB1B/TTK/NCAPG/CENPF	20
BP	GO:1901987	regulation of cell cycle phase transition	1.14473e-15	2.76201e-13	TPX2/CCNB1/ANLN/CDK1/ORC1/CDC6/AURKB/GTSE1/E2F7/CDCA5/CDC45/DLGAP5/CLSPN/CDC25A/ESPL1/E2F8/PLK1/CHEK1/E2F1/TICRR/CDC20/BUB1/TRIP13/UBE2C/BUB1B/DTL/HMMR/TTK/CENPF	29
BP	GO:1901990	regulation of mitotic cell cycle phase transition	1.26575e-15	2.76201e-13	TPX2/CCNB1/ANLN/CDK1/ORC1/CDC6/AURKB/GTSE1/E2F7/CDCA5/CDC45/DLGAP5/CLSPN/CDC25A/ESPL1/E2F8/PLK1/E2F1/TICRR/CDC20/BUB1/TRIP13/UBE2C/BUB1B/DTL/HMMR/TTK/CENPF	28
BP	GO:0007088	regulation of mitotic nuclear division	1.72343e-14	3.41882e-12	CCNB1/ANLN/CDC6/AURKB/CDCA5/DLGAP5/MKI67/CAV2/ESPL1/PLK1/CHEK1/CDC20/BUB1/TRIP13/UBE2C/BUB1B/TTK/CENPF	18
BP	GO:0030071	regulation of mitotic metaphase/anaphase transition	3.63362e-14	6.60745e-12	CCNB1/CDC6/AURKB/DLGAP5/ESPL1/PLK1/CDC20/BUB1/TRIP13/BUB1B/TTK/CENPF	12
BP	GO:1902099	regulation of metaphase/anaphase transition of cell cycle	6.00817e-14	1.0085e-11	CCNB1/CDC6/AURKB/DLGAP5/ESPL1/PLK1/CDC20/BUB1/TRIP13/BUB1B/TTK/CENPF	12
BP	GO:0007091	metaphase/anaphase transition of mitotic cell cycle	7.66249e-14	1.19431e-11	CCNB1/CDC6/AURKB/DLGAP5/ESPL1/PLK1/CDC20/BUB1/TRIP13/BUB1B/TTK/CENPF	12
BP	GO:0051607	defense response to virus	9.68398e-14	1.40876e-11	APOBEC3B/IFI27/OAS1/TRIM6/EIF2AK2/OAS2/HERC5/MX1/IFIH1/IFIT3/TRIM22/IFIT2/OAS3/DDX60/AZU1/OASL/DEFA3/IFI44L/IFIT1/RSAD2	20
BP	GO:0044784	metaphase/anaphase transition of cell cycle	1.22735e-13	1.67387e-11	CCNB1/CDC6/AURKB/DLGAP5/ESPL1/PLK1/CDC20/BUB1/TRIP13/BUB1B/TTK/CENPF	12
BP	GO:0010965	regulation of mitotic sister chromatid separation	1.5421e-13	1.97943e-11	CCNB1/CDC6/AURKB/DLGAP5/ESPL1/PLK1/CDC20/BUB1/TRIP13/BUB1B/TTK/CENPF	12
BP	GO:0051783	regulation of nuclear division	1.88663e-13	2.28712e-11	CCNB1/ANLN/CDC6/AURKB/CDCA5/DLGAP5/MKI67/CAV2/ESPL1/PLK1/CHEK1/CDC20/BUB1/TRIP13/UBE2C/BUB1B/TTK/CENPF	18
BP	GO:0051306	mitotic sister chromatid separation	2.97781e-13	3.41995e-11	CCNB1/CDC6/AURKB/DLGAP5/ESPL1/PLK1/CDC20/BUB1/TRIP13/BUB1B/TTK/CENPF	12
BP	GO:0009615	response to virus	3.86591e-13	4.21791e-11	APOBEC3B/IFI27/OAS1/TRIM6/EIF2AK2/OAS2/HERC5/MX1/IFIH1/IFIT3/TRIM22/IFIT2/OAS3/DDX60/AZU1/OASL/DEFA3/IFI44L/IFIT1/RSAD2/LCN2/IFI44	22
BP	GO:0010948	negative regulation of cell cycle process	4.40224e-13	4.48614e-11	CCNB1/CDK1/ORC1/CDC6/AURKB/GTSE1/E2F7/CLSPN/ESPL1/E2F8/PLK1/CHEK1/E2F1/TICRR/CDC20/BUB1/TRIP13/RRM2/BUB1B/DTL/RAD51/TTK/CENPF	23
BP	GO:1905818	regulation of chromosome separation	4.52293e-13	4.48614e-11	CCNB1/CDC6/AURKB/DLGAP5/ESPL1/PLK1/CDC20/BUB1/TRIP13/BUB1B/TTK/CENPF	12
BP	GO:0033045	regulation of sister chromatid segregation	5.02298e-13	4.76551e-11	CCNB1/CDC6/AURKB/CDCA5/DLGAP5/ESPL1/PLK1/CDC20/BUB1/TRIP13/BUB1B/TTK/CENPF	13
BP	GO:0098813	nuclear chromosome segregation	5.89697e-13	5.36158e-11	CCNB1/CDC6/AURKB/KIF4A/HASPIN/ZWINT/CDCA5/DLGAP5/ESPL1/PLK1/KIF18B/KIFC1/CDC20/BUB1/TRIP13/TOP2A/BUB1B/TTK/NCAPG/CENPF	20
BP	GO:0051983	regulation of chromosome segregation	7.9735e-13	6.95961e-11	CCNB1/CDC6/AURKB/CDCA5/DLGAP5/MKI67/ESPL1/PLK1/CDC20/BUB1/TRIP13/BUB1B/TTK/CENPF	14
BP	GO:1901988	negative regulation of cell cycle phase transition	8.38772e-13	7.03958e-11	CCNB1/CDK1/ORC1/CDC6/AURKB/GTSE1/E2F7/CLSPN/E2F8/PLK1/CHEK1/E2F1/TICRR/CDC20/BUB1/TRIP13/BUB1B/DTL/TTK/CENPF	20
BP	GO:0033047	regulation of mitotic sister chromatid segregation	1.45241e-12	1.17382e-10	CCNB1/CDC6/AURKB/DLGAP5/ESPL1/PLK1/CDC20/BUB1/TRIP13/BUB1B/TTK/CENPF	12
BP	GO:0051304	chromosome separation	2.41561e-12	1.88254e-10	CCNB1/CDC6/AURKB/DLGAP5/ESPL1/PLK1/CDC20/BUB1/TRIP13/TOP2A/BUB1B/TTK/CENPF	13
BP	GO:0060337	type I interferon signaling pathway	4.92597e-12	3.583e-10	IFI27/OAS1/XAF1/USP18/TRIM6/OAS2/MX1/IFIT3/IFIT2/OAS3/OASL/IFIT1/RSAD2	13
BP	GO:0071357	cellular response to type I interferon	4.92597e-12	3.583e-10	IFI27/OAS1/XAF1/USP18/TRIM6/OAS2/MX1/IFIT3/IFIT2/OAS3/OASL/IFIT1/RSAD2	13
BP	GO:0033046	negative regulation of sister chromatid segregation	7.61665e-12	5.36139e-10	CCNB1/AURKB/ESPL1/PLK1/CDC20/BUB1/TRIP13/BUB1B/TTK/CENPF	10
BP	GO:0045930	negative regulation of mitotic cell cycle	7.94365e-12	5.41684e-10	CCNB1/CDK1/ORC1/CDC6/AURKB/ZWINT/GTSE1/E2F7/CLSPN/E2F8/PLK1/CHEK1/E2F1/TICRR/CDC20/BUB1/TRIP13/TOP2A/BUB1B/TTK/CENPF	21
BP	GO:0034340	response to type I interferon	8.45378e-12	5.59001e-10	IFI27/OAS1/XAF1/USP18/TRIM6/OAS2/MX1/IFIT3/IFIT2/OAS3/OASL/IFIT1/RSAD2	13
BP	GO:0051985	negative regulation of chromosome segregation	9.71416e-12	6.23451e-10	CCNB1/AURKB/ESPL1/PLK1/CDC20/BUB1/TRIP13/BUB1B/TTK/CENPF	10
BP	GO:0007094	mitotic spindle assembly checkpoint	1.94794e-11	1.11858e-09	CCNB1/AURKB/PLK1/CDC20/BUB1/TRIP13/BUB1B/TTK/CENPF	9
BP	GO:0031577	spindle checkpoint	1.94794e-11	1.11858e-09	CCNB1/AURKB/PLK1/CDC20/BUB1/TRIP13/BUB1B/TTK/CENPF	9
BP	GO:0071173	spindle assembly checkpoint	1.94794e-11	1.11858e-09	CCNB1/AURKB/PLK1/CDC20/BUB1/TRIP13/BUB1B/TTK/CENPF	9
BP	GO:0071174	mitotic spindle checkpoint	1.94794e-11	1.11858e-09	CCNB1/AURKB/PLK1/CDC20/BUB1/TRIP13/BUB1B/TTK/CENPF	9
BP	GO:1901991	negative regulation of mitotic cell cycle phase transition	2.09759e-11	1.17363e-09	CCNB1/CDK1/ORC1/CDC6/AURKB/GTSE1/E2F7/CLSPN/E2F8/PLK1/E2F1/TICRR/CDC20/BUB1/TRIP13/BUB1B/TTK/CENPF	18
BP	GO:0031570	DNA integrity checkpoint	2.16994e-11	1.18376e-09	CCNB1/CDK1/ORC1/CDC6/GTSE1/E2F7/CDC45/CLSPN/E2F8/PLK1/CHEK1/E2F1/TICRR/TOP2A/DTL	15
BP	GO:0045841	negative regulation of mitotic metaphase/anaphase transition	3.44059e-11	1.83115e-09	CCNB1/AURKB/PLK1/CDC20/BUB1/TRIP13/BUB1B/TTK/CENPF	9
BP	GO:1902100	negative regulation of metaphase/anaphase transition of cell cycle	4.51013e-11	2.31039e-09	CCNB1/AURKB/PLK1/CDC20/BUB1/TRIP13/BUB1B/TTK/CENPF	9
BP	GO:0045839	negative regulation of mitotic nuclear division	4.5528e-11	2.31039e-09	CCNB1/AURKB/PLK1/CHEK1/CDC20/BUB1/TRIP13/BUB1B/TTK/CENPF	10
BP	GO:0044839	cell cycle G2/M phase transition	6.6908e-11	3.31819e-09	TPX2/CCNB1/FOXM1/CDK1/ORC1/CDC6/AURKB/CCNA2/GTSE1/CCNB2/CLSPN/CDC25A/PLK1/CHEK1/TICRR/DTL/HMMR/CENPF	18
BP	GO:2000816	negative regulation of mitotic sister chromatid separation	7.56037e-11	3.66612e-09	CCNB1/AURKB/PLK1/CDC20/BUB1/TRIP13/BUB1B/TTK/CENPF	9
BP	GO:1905819	negative regulation of chromosome separation	9.6773e-11	4.59063e-09	CCNB1/AURKB/PLK1/CDC20/BUB1/TRIP13/BUB1B/TTK/CENPF	9
BP	GO:0033048	negative regulation of mitotic sister chromatid segregation	1.55292e-10	7.20986e-09	CCNB1/AURKB/PLK1/CDC20/BUB1/TRIP13/BUB1B/TTK/CENPF	9
BP	GO:0000083	regulation of transcription involved in G1/S transition of mitotic cell cycle	1.84152e-10	8.37167e-09	ORC1/CDC6/TYMS/E2F7/CDC45/CCNA1/E2F1/RRM2	8
BP	GO:0051784	negative regulation of nuclear division	2.0342e-10	9.05884e-09	CCNB1/AURKB/PLK1/CHEK1/CDC20/BUB1/TRIP13/BUB1B/TTK/CENPF	10
BP	GO:1902850	microtubule cytoskeleton organization involved in mitosis	3.06248e-10	1.33653e-08	TPX2/CCNB1/BIRC5/AURKB/KIF4A/ESPL1/PLK1/KIFC1/MYBL2/CENPA/CDC20/SPC25/TTK	13
BP	GO:0006260	DNA replication	8.3914e-10	3.59038e-08	GINS1/CDK1/ORC1/CDC6/MCM10/CCNA2/E2F7/CDC45/CLSPN/EXO1/E2F8/CHEK1/TICRR/POLQ/RRM2/DTL/RAD51	17
BP	GO:0045069	regulation of viral genome replication	1.41373e-09	5.93252e-08	IFI27/OAS1/TRIM6/EIF2AK2/MX1/OAS3/OASL/IFIT1/TOP2A/LTF/RSAD2	11
BP	GO:1903900	regulation of viral life cycle	1.52364e-09	6.16015e-08	IFI27/OAS1/TRIM6/EIF2AK2/MX1/CAV2/OAS3/PTX3/OASL/IFIT1/TOP2A/LTF/RSAD2	13
BP	GO:0000086	G2/M transition of mitotic cell cycle	1.52444e-09	6.16015e-08	TPX2/CCNB1/FOXM1/CDK1/ORC1/CDC6/AURKB/CCNA2/CCNB2/CLSPN/CDC25A/PLK1/TICRR/DTL/HMMR/CENPF	16
BP	GO:1902749	regulation of cell cycle G2/M phase transition	1.61245e-09	6.39733e-08	TPX2/CCNB1/CDK1/ORC1/CDC6/AURKB/GTSE1/CLSPN/CDC25A/PLK1/CHEK1/TICRR/DTL/HMMR/CENPF	15
BP	GO:0044843	cell cycle G1/S phase transition	3.17608e-09	1.2376e-07	CCNB1/CDK1/ORC1/CDC6/MCM10/TYMS/CCNA2/GTSE1/E2F7/IQGAP3/CDC45/CDC25A/E2F8/CCNA1/E2F1/INHBA/RRM2	17
BP	GO:0045071	negative regulation of viral genome replication	3.81808e-09	1.46166e-07	OAS1/TRIM6/EIF2AK2/MX1/OAS3/OASL/IFIT1/LTF/RSAD2	9
BP	GO:0007052	mitotic spindle organization	4.60505e-09	1.70317e-07	TPX2/CCNB1/BIRC5/AURKB/KIF4A/PLK1/KIFC1/MYBL2/CDC20/SPC25/TTK	11
BP	GO:0044774	mitotic DNA integrity checkpoint	4.60505e-09	1.70317e-07	CCNB1/CDK1/ORC1/CDC6/GTSE1/E2F7/CLSPN/E2F8/E2F1/TICRR/TOP2A	11
BP	GO:0043312	neutrophil degranulation	5.84008e-09	2.12394e-07	CEACAM6/OLR1/CHIT1/GGH/MMP8/OLFM4/BPI/ABCA13/DEFA4/CEACAM8/MPO/CAMP/TXNDC5/PTX3/AZU1/CRISP3/TCN1/LTF/SERPINB10/LCN2/TARM1	21
BP	GO:0002283	neutrophil activation involved in immune response	6.50705e-09	2.32772e-07	CEACAM6/OLR1/CHIT1/GGH/MMP8/OLFM4/BPI/ABCA13/DEFA4/CEACAM8/MPO/CAMP/TXNDC5/PTX3/AZU1/CRISP3/TCN1/LTF/SERPINB10/LCN2/TARM1	21
BP	GO:1903901	negative regulation of viral life cycle	6.90192e-09	2.42915e-07	OAS1/TRIM6/EIF2AK2/MX1/OAS3/PTX3/OASL/IFIT1/LTF/RSAD2	10
BP	GO:0000082	G1/S transition of mitotic cell cycle	8.75708e-09	3.03316e-07	CCNB1/CDK1/ORC1/CDC6/MCM10/TYMS/GTSE1/E2F7/IQGAP3/CDC45/CDC25A/E2F8/CCNA1/E2F1/INHBA/RRM2	16
BP	GO:0042119	neutrophil activation	9.27594e-09	3.16267e-07	CEACAM6/OLR1/CHIT1/GGH/MMP8/OLFM4/BPI/ABCA13/DEFA4/CEACAM8/MPO/CAMP/TXNDC5/PTX3/AZU1/CRISP3/TCN1/LTF/SERPINB10/LCN2/TARM1	21
BP	GO:0002446	neutrophil mediated immunity	9.60597e-09	3.22481e-07	CEACAM6/OLR1/CHIT1/GGH/MMP8/OLFM4/BPI/ABCA13/DEFA4/CEACAM8/MPO/CAMP/TXNDC5/PTX3/AZU1/CRISP3/TCN1/LTF/SERPINB10/LCN2/TARM1	21
BP	GO:0071103	DNA conformation change	1.00927e-08	3.33688e-07	CCNB1/GINS1/CDK1/H2BC9/CDCA5/CDC45/H4C8/H2BC7/H2BC5/CENPA/POLQ/TOP2A/HJURP/H2BC8/RAD51/NCAPG/CENPM/H2BC17	18
BP	GO:1901992	positive regulation of mitotic cell cycle phase transition	1.35067e-08	4.39895e-07	CCNB1/CDK1/CDC6/CDCA5/CDC45/DLGAP5/CDC25A/ESPL1/UBE2C/DTL	10
BP	GO:0019079	viral genome replication	2.04265e-08	6.55482e-07	IFI27/OAS1/TRIM6/EIF2AK2/MX1/OAS3/OASL/IFIT1/TOP2A/LTF/RSAD2	11
BP	GO:0043903	regulation of interspecies interactions between organisms	2.35586e-08	7.45034e-07	IFI27/OAS1/TRIM6/EIF2AK2/MX1/CAV2/OAS3/PTX3/OASL/IFIT1/TOP2A/CAV1/LTF/RSAD2	14
BP	GO:0033044	regulation of chromosome organization	2.45788e-08	7.66193e-07	CCNB1/CDC6/AURKB/CDCA5/CDC45/DLGAP5/MKI67/ESPL1/PLK1/CHEK1/CDC20/BUB1/TRIP13/TOP2A/BUB1B/TTK/CENPF	17
BP	GO:0072401	signal transduction involved in DNA integrity checkpoint	2.63648e-08	7.99039e-07	CCNB1/CDK1/GTSE1/E2F7/E2F8/PLK1/CHEK1/E2F1/DTL	9
BP	GO:0072422	signal transduction involved in DNA damage checkpoint	2.63648e-08	7.99039e-07	CCNB1/CDK1/GTSE1/E2F7/E2F8/PLK1/CHEK1/E2F1/DTL	9
BP	GO:0072395	signal transduction involved in cell cycle checkpoint	2.97756e-08	8.90048e-07	CCNB1/CDK1/GTSE1/E2F7/E2F8/PLK1/CHEK1/E2F1/DTL	9
BP	GO:0048525	negative regulation of viral process	3.72517e-08	1.09848e-06	OAS1/TRIM6/EIF2AK2/MX1/OAS3/PTX3/OASL/IFIT1/LTF/RSAD2	10
BP	GO:0010389	regulation of G2/M transition of mitotic cell cycle	4.19555e-08	1.22068e-06	TPX2/CCNB1/CDK1/ORC1/CDC6/AURKB/CLSPN/CDC25A/PLK1/TICRR/DTL/HMMR/CENPF	13
BP	GO:0090307	mitotic spindle assembly	4.91442e-08	1.41102e-06	TPX2/BIRC5/AURKB/KIF4A/PLK1/KIFC1/MYBL2/CDC20	8
BP	GO:1901989	positive regulation of cell cycle phase transition	5.93239e-08	1.68118e-06	CCNB1/CDK1/CDC6/CDCA5/CDC45/DLGAP5/CDC25A/ESPL1/UBE2C/DTL	10
BP	GO:0007051	spindle organization	7.14081e-08	1.99769e-06	TPX2/CCNB1/BIRC5/AURKB/KIF4A/ESPL1/PLK1/KIFC1/MYBL2/CDC20/SPC25/TTK	12
BP	GO:0002227	innate immune response in mucosa	7.28239e-08	2.01151e-06	DEFA4/H2BC7/CAMP/DEFA3/LTF/H2BC8	6
BP	GO:0000910	cytokinesis	7.61784e-08	2.07787e-06	ANLN/SEPTIN4/CDC6/AURKB/KIF4A/E2F7/CEP55/ESPL1/E2F8/PLK1/CENPA/KIF20A	12
BP	GO:0050792	regulation of viral process	8.44244e-08	2.27436e-06	IFI27/OAS1/TRIM6/EIF2AK2/MX1/CAV2/OAS3/PTX3/OASL/IFIT1/TOP2A/LTF/RSAD2	13
BP	GO:0006323	DNA packaging	8.94789e-08	2.38113e-06	CCNB1/CDK1/H2BC9/CDCA5/H4C8/H2BC7/H2BC5/CENPA/TOP2A/HJURP/H2BC8/NCAPG/CENPM/H2BC17	14
BP	GO:2001251	negative regulation of chromosome organization	1.31193e-07	3.44912e-06	CCNB1/AURKB/ESPL1/PLK1/CDC20/BUB1/TRIP13/TOP2A/BUB1B/TTK/CENPF	11
BP	GO:0090068	positive regulation of cell cycle process	1.44387e-07	3.75079e-06	CCNB1/CDK1/CDC6/AURKB/GTSE1/E2F7/CDCA5/CDC45/DLGAP5/CDC25A/ESPL1/E2F8/E2F1/UBE2C/DTL	15
BP	GO:0019731	antibacterial humoral response	2.21715e-07	5.69184e-06	DEFA4/H2BC7/CAMP/DEFA3/LTF/H2BC8/JCHAIN	7
BP	GO:0019730	antimicrobial humoral response	2.25654e-07	5.72558e-06	BPI/DEFA4/H2BC7/CAMP/AZU1/DEFA3/LTF/H2BC8/LCN2/JCHAIN	10
BP	GO:0000076	DNA replication checkpoint	2.74528e-07	6.88561e-06	ORC1/CDC6/CDC45/CLSPN/TICRR	5
BP	GO:0061640	cytoskeleton-dependent cytokinesis	4.1607e-07	1.03171e-05	ANLN/SEPTIN4/AURKB/KIF4A/CEP55/ESPL1/PLK1/CENPA/KIF20A	9
BP	GO:0019058	viral life cycle	4.93437e-07	1.20981e-05	CDK1/IFI27/OAS1/TRIM6/EIF2AK2/MX1/CAV2/OAS3/PTX3/OASL/IFIT1/TOP2A/CAV1/LTF/RSAD2	15
BP	GO:0042770	signal transduction in response to DNA damage	5.0566e-07	1.226e-05	CCNB1/FOXM1/CDK1/GTSE1/E2F7/E2F8/PLK1/CHEK1/E2F1/DTL	10
BP	GO:1902750	negative regulation of cell cycle G2/M phase transition	6.31484e-07	1.51425e-05	CDK1/ORC1/CDC6/AURKB/CLSPN/PLK1/CHEK1/TICRR/DTL	9
BP	GO:0051321	meiotic cell cycle	6.69644e-07	1.5883e-05	EXO1/DUSP13/CDC25A/ESPL1/CCNA1/PLK1/CDC20/BUB1/TRIP13/TOP2A/BUB1B/RAD51/TTK	13
BP	GO:0045787	positive regulation of cell cycle	8.30778e-07	1.9493e-05	CCNB1/CDK1/CDC6/AURKB/GTSE1/E2F7/CDCA5/CDC45/DLGAP5/CDC25A/ESPL1/E2F8/CHEK1/E2F1/UBE2C/DTL	16
BP	GO:0002385	mucosal immune response	9.60047e-07	2.22864e-05	DEFA4/H2BC7/CAMP/DEFA3/LTF/H2BC8	6
BP	GO:0000077	DNA damage checkpoint	1.1216e-06	2.57627e-05	CCNB1/CDK1/GTSE1/E2F7/CLSPN/E2F8/PLK1/CHEK1/E2F1/DTL	10
BP	GO:0071459	protein localization to chromosome, centromeric region	1.23123e-06	2.79862e-05	CDK1/AURKB/HASPIN/CENPA/TTK	5
BP	GO:0016572	histone phosphorylation	1.33975e-06	3.01389e-05	CCNB1/CDK1/AURKB/HASPIN/CCNA2/CHEK1	6
BP	GO:0033314	mitotic DNA replication checkpoint	1.49895e-06	3.33763e-05	ORC1/CDC6/CLSPN/TICRR	4
BP	GO:0002251	organ or tissue specific immune response	1.5711e-06	3.46293e-05	DEFA4/H2BC7/CAMP/DEFA3/LTF/H2BC8	6
BP	GO:0006261	DNA-dependent DNA replication	1.62393e-06	3.54358e-05	GINS1/ORC1/CDC6/MCM10/E2F7/CDC45/E2F8/TICRR/POLQ/RAD51	10
BP	GO:1903046	meiotic cell cycle process	1.64703e-06	3.55841e-05	CDC25A/ESPL1/CCNA1/PLK1/CDC20/BUB1/TRIP13/TOP2A/BUB1B/RAD51/TTK	11
BP	GO:0007062	sister chromatid cohesion	2.00459e-06	4.28846e-05	HASPIN/CDCA5/ESPL1/PLK1/CDC20/BUB1/BUB1B	7
BP	GO:0045931	positive regulation of mitotic cell cycle	3.24115e-06	6.86654e-05	CCNB1/CDK1/CDC6/CDCA5/CDC45/DLGAP5/CDC25A/ESPL1/UBE2C/DTL	10
BP	GO:0007077	mitotic nuclear envelope disassembly	3.48174e-06	7.30531e-05	CCNB1/CDK1/CCNB2/PLK1	4
BP	GO:0065004	protein-DNA complex assembly	4.00775e-06	8.32889e-05	H2BC9/CDC45/H4C8/H2BC7/H2BC5/CENPA/HJURP/H2BC8/RAD51/CENPM/CENPF/H2BC17	12
BP	GO:0000281	mitotic cytokinesis	4.97247e-06	0.000102363	ANLN/KIF4A/CEP55/ESPL1/PLK1/CENPA/KIF20A	7
BP	GO:0140013	meiotic nuclear division	5.23856e-06	0.000106321	ESPL1/CCNA1/PLK1/CDC20/BUB1/TRIP13/TOP2A/BUB1B/RAD51/TTK	10
BP	GO:0000079	regulation of cyclin-dependent protein serine/threonine kinase activity	5.26221e-06	0.000106321	CCNB1/CDC6/CCNA2/CCNB2/HERC5/CDC25A/CCNA1/PLK1	8
BP	GO:1904029	regulation of cyclin-dependent protein kinase activity	7.01047e-06	0.000140345	CCNB1/CDC6/CCNA2/CCNB2/HERC5/CDC25A/CCNA1/PLK1	8
BP	GO:0044818	mitotic G2/M transition checkpoint	8.05297e-06	0.000158335	CDK1/ORC1/CDC6/CLSPN/TICRR	5
BP	GO:0051225	spindle assembly	8.05422e-06	0.000158335	TPX2/BIRC5/AURKB/KIF4A/PLK1/KIFC1/MYBL2/CDC20	8
BP	GO:0006334	nucleosome assembly	9.24852e-06	0.00018019	H2BC9/H4C8/H2BC7/H2BC5/CENPA/HJURP/H2BC8/CENPM/H2BC17	9
BP	GO:0031572	G2 DNA damage checkpoint	9.52906e-06	0.000184012	CDK1/CLSPN/PLK1/CHEK1/DTL	5
BP	GO:0031145	anaphase-promoting complex-dependent catabolic process	1.09356e-05	0.000209322	CCNB1/CDK1/AURKB/PLK1/CDC20/UBE2C/BUB1B	7
BP	GO:0030397	membrane disassembly	1.24313e-05	0.000233848	CCNB1/CDK1/CCNB2/PLK1	4
BP	GO:0051081	nuclear envelope disassembly	1.24313e-05	0.000233848	CCNB1/CDK1/CCNB2/PLK1	4
BP	GO:0034502	protein localization to chromosome	1.28539e-05	0.000239732	CDK1/AURKB/HASPIN/CDCA5/PLK1/CENPA/TTK	7
BP	GO:0006977	DNA damage response, signal transduction by p53 class mediator resulting in cell cycle arrest	1.37044e-05	0.000253428	CCNB1/CDK1/GTSE1/E2F7/E2F8/E2F1	6
BP	GO:0072431	signal transduction involved in mitotic G1 DNA damage checkpoint	1.51986e-05	0.000276374	CCNB1/CDK1/GTSE1/E2F7/E2F8/E2F1	6
BP	GO:1902400	intracellular signal transduction involved in G1 DNA damage checkpoint	1.51986e-05	0.000276374	CCNB1/CDK1/GTSE1/E2F7/E2F8/E2F1	6
BP	GO:0034501	protein localization to kinetochore	1.61376e-05	0.000291023	CDK1/AURKB/HASPIN/TTK	4
BP	GO:0071824	protein-DNA complex subunit organization	1.81265e-05	0.000324212	H2BC9/CDC45/H4C8/H2BC7/H2BC5/CENPA/HJURP/H2BC8/RAD51/CENPM/CENPF/H2BC17	12
BP	GO:0072413	signal transduction involved in mitotic cell cycle checkpoint	1.85814e-05	0.000324373	CCNB1/CDK1/GTSE1/E2F7/E2F8/E2F1	6
BP	GO:1902402	signal transduction involved in mitotic DNA damage checkpoint	1.85814e-05	0.000324373	CCNB1/CDK1/GTSE1/E2F7/E2F8/E2F1	6
BP	GO:1902403	signal transduction involved in mitotic DNA integrity checkpoint	1.85814e-05	0.000324373	CCNB1/CDK1/GTSE1/E2F7/E2F8/E2F1	6
BP	GO:0010639	negative regulation of organelle organization	2.1029e-05	0.000364186	CCNB1/AURKB/CRACD/TACSTD2/ESPL1/PLK1/CHEK1/CDC20/BUB1/TRIP13/TOP2A/BUB1B/TTK/CENPF	14
BP	GO:0045132	meiotic chromosome segregation	2.18934e-05	0.00037617	ESPL1/PLK1/BUB1/TRIP13/TOP2A/BUB1B/TTK	7
BP	GO:0006270	DNA replication initiation	2.33593e-05	0.000398223	ORC1/CDC6/MCM10/CDC45/TICRR	5
BP	GO:0031571	mitotic G1 DNA damage checkpoint	2.71662e-05	0.000455996	CCNB1/CDK1/GTSE1/E2F7/E2F8/E2F1	6
BP	GO:0044819	mitotic G1/S transition checkpoint	2.71662e-05	0.000455996	CCNB1/CDK1/GTSE1/E2F7/E2F8/E2F1	6
BP	GO:0044783	G1 DNA damage checkpoint	2.97455e-05	0.000495479	CCNB1/CDK1/GTSE1/E2F7/E2F8/E2F1	6
BP	GO:0044773	mitotic DNA damage checkpoint	3.56311e-05	0.000589021	CCNB1/CDK1/GTSE1/E2F7/CLSPN/E2F8/E2F1	7
BP	GO:0007292	female gamete generation	4.31219e-05	0.000707493	CCNB1/LEP/PLK1/PTX3/TRIP13/INHBA/TOP2A/TTK	8
BP	GO:0072331	signal transduction by p53 class mediator	4.51688e-05	0.000735545	TPX2/CCNB1/FOXM1/CDK1/AURKB/GTSE1/E2F7/EXO1/E2F8/CHEK1/E2F1	11
BP	GO:0032069	regulation of nuclease activity	4.78152e-05	0.000772873	OAS1/OAS2/OAS3/OASL	4
BP	GO:0034728	nucleosome organization	6.10323e-05	0.000979257	H2BC9/H4C8/H2BC7/H2BC5/CENPA/HJURP/H2BC8/CENPM/H2BC17	9
BP	GO:0061844	antimicrobial humoral immune response mediated by antimicrobial peptide	6.29981e-05	0.00100342	DEFA4/H2BC7/CAMP/DEFA3/LTF/H2BC8	6
BP	GO:0030330	DNA damage response, signal transduction by p53 class mediator	6.68711e-05	0.00105739	CCNB1/FOXM1/CDK1/GTSE1/E2F7/E2F8/E2F1	7
BP	GO:0071156	regulation of cell cycle arrest	7.09475e-05	0.00111378	CCNB1/FOXM1/CDK1/GTSE1/E2F7/E2F8/E2F1	7
BP	GO:0030261	chromosome condensation	7.62103e-05	0.00118785	CCNB1/CDK1/CDCA5/TOP2A/NCAPG	5
BP	GO:0051702	interaction with symbiont	8.5073e-05	0.00131658	IFI27/CAV2/CAMP/PTX3/AZU1/LTF	6
BP	GO:0035821	modulation of process of other organism	9.44924e-05	0.00145206	IFI27/EIF2AK2/CAV2/DEFA4/PTX3/DEFA3/LTF	7
BP	GO:0010971	positive regulation of G2/M transition of mitotic cell cycle	0.000110597	0.00168765	CCNB1/CDK1/CDC25A/DTL	4
BP	GO:0071158	positive regulation of cell cycle arrest	0.000120887	0.00183185	CCNB1/CDK1/GTSE1/E2F7/E2F8/E2F1	6
BP	GO:0009620	response to fungus	0.000124335	0.00186365	DEFA4/MPO/PTX3/DEFA3/LTF	5
BP	GO:0031497	chromatin assembly	0.000124693	0.00186365	H2BC9/H4C8/H2BC7/H2BC5/CENPA/HJURP/H2BC8/CENPM/H2BC17	9
BP	GO:0051673	membrane disruption in other organism	0.000126385	0.0018761	DEFA4/DEFA3/LTF	3
BP	GO:0051984	positive regulation of chromosome segregation	0.00012809	0.00188855	CCNB1/CDC6/DLGAP5/ESPL1	4
BP	GO:0061982	meiosis I cell cycle process	0.000130768	0.00191509	CDC25A/ESPL1/CCNA1/PLK1/TRIP13/TOP2A/RAD51	7
BP	GO:0006959	humoral immune response	0.000139328	0.00202685	SERPING1/EXO1/BPI/DEFA4/H2BC7/CAMP/AZU1/DEFA3/LTF/H2BC8/LCN2/JCHAIN	12
BP	GO:1904668	positive regulation of ubiquitin protein ligase activity	0.000167353	0.00240967	PLK1/CDC20/UBE2C	3
BP	GO:0044788	modulation by host of viral process	0.000168956	0.00240967	IFI27/CAV2/PTX3/LTF	4
BP	GO:1902751	positive regulation of cell cycle G2/M phase transition	0.000168956	0.00240967	CCNB1/CDK1/CDC25A/DTL	4
BP	GO:0034508	centromere complex assembly	0.000177304	0.00251231	H4C8/CENPA/HJURP/CENPM/CENPF	5
BP	GO:0050829	defense response to Gram-negative bacterium	0.00017863	0.00251477	BPI/DEFA4/CAMP/AZU1/DEFA3/LTF	6
BP	GO:0018107	peptidyl-threonine phosphorylation	0.000186591	0.00261001	CDK1/HASPIN/TRIM6/PLK1/CHEK1/AZU1/TTK	7
BP	GO:0032465	regulation of cytokinesis	0.000190072	0.00264176	CDC6/AURKB/E2F7/E2F8/PLK1/KIF20A	6
BP	GO:0007143	female meiotic nuclear division	0.000192575	0.00265961	PLK1/TRIP13/TOP2A/TTK	4
BP	GO:0051098	regulation of binding	0.000214456	0.00294318	BAMBI/AURKB/PCSK9/CDCA5/TRIM6/MMP8/PLK1/E2F1/IFIT2/IFIT1/CAV1/HJURP	12
BP	GO:0010972	negative regulation of G2/M transition of mitotic cell cycle	0.000241751	0.00329703	CDK1/ORC1/CDC6/AURKB/CLSPN/TICRR	6
BP	GO:0018210	peptidyl-threonine modification	0.000272482	0.00367853	CDK1/HASPIN/TRIM6/PLK1/CHEK1/AZU1/TTK	7
BP	GO:0072425	signal transduction involved in G2 DNA damage checkpoint	0.000273095	0.00367853	PLK1/CHEK1/DTL	3
BP	GO:0062208	positive regulation of pattern recognition receptor signaling pathway	0.000277686	0.00371742	DDX60/CAV1/LTF/RSAD2	4
BP	GO:0031640	killing of cells of other organism	0.000287071	0.00381963	DEFA4/CAMP/AZU1/DEFA3/LTF	5
BP	GO:0032496	response to lipopolysaccharide	0.000291244	0.00382846	CMPK2/TRIM6/CARD17/BPI/DEFA4/MPO/DEFA3/MAOB/LTF/LCN2/CD274	11
BP	GO:0042742	defense response to bacterium	0.000291244	0.00382846	BPI/DEFA4/H2BC7/MPO/CAMP/AZU1/DEFA3/LTF/H2BC8/LCN2/JCHAIN	11
BP	GO:0006333	chromatin assembly or disassembly	0.000307791	0.00402175	H2BC9/H4C8/H2BC7/H2BC5/CENPA/HJURP/H2BC8/CENPM/H2BC17	9
BP	GO:0009263	deoxyribonucleotide biosynthetic process	0.000339021	0.00437739	CMPK2/TYMS/RRM2	3
BP	GO:1902969	mitotic DNA replication	0.000339021	0.00437739	GINS1/CDC45/RAD51	3
BP	GO:0071695	anatomical structure maturation	0.000349645	0.00446743	CCNB1/LEP/SEPTIN4/GLDN/TYMS/EPAS1/BHLHA15/TRIP13/LTF	9
BP	GO:2000045	regulation of G1/S transition of mitotic cell cycle	0.000350089	0.00446743	CCNB1/CDK1/CDC6/GTSE1/E2F7/CDC45/E2F8/E2F1	8
BP	GO:0021700	developmental maturation	0.000357476	0.00453518	CCNB1/LEP/SEPTIN4/GLDN/TYMS/EPAS1/CDC20/BHLHA15/TRIP13/LTF	10
BP	GO:0002237	response to molecule of bacterial origin	0.000403908	0.00509462	CMPK2/TRIM6/CARD17/BPI/DEFA4/MPO/DEFA3/MAOB/LTF/LCN2/CD274	11
BP	GO:0007050	cell cycle arrest	0.00040847	0.00512255	CCNB1/FOXM1/CDK1/GTSE1/E2F7/E2F8/DHCR24/E2F1/INHBA	9
BP	GO:0032506	cytokinetic process	0.000474863	0.00592115	ANLN/AURKB/CEP55/KIF20A	4
BP	GO:0071360	cellular response to exogenous dsRNA	0.000499727	0.00619578	IFIH1/IFIT1/CAV1	3
BP	GO:0050832	defense response to fungus	0.000523795	0.00645749	DEFA4/MPO/DEFA3/LTF	4
BP	GO:0044786	cell cycle DNA replication	0.000539737	0.00659172	GINS1/E2F7/CDC45/E2F8/RAD51	5
BP	GO:0006275	regulation of DNA replication	0.000540724	0.00659172	CDK1/CDC6/CCNA2/E2F7/E2F8/TICRR	6
BP	GO:0070317	negative regulation of G0 to G1 transition	0.00057621	0.00698528	CHEK1/E2F1/RRM2/RAD51	4
BP	GO:0051782	negative regulation of cell division	0.000595553	0.00717989	AURKB/E2F7/E2F8	3
BP	GO:1902806	regulation of cell cycle G1/S phase transition	0.000649891	0.00779193	CCNB1/CDK1/CDC6/GTSE1/E2F7/CDC45/E2F8/E2F1	8
BP	GO:0051303	establishment of chromosome localization	0.000694274	0.00827857	CCNB1/CDCA5/DLGAP5/KIFC1/CENPF	5
BP	GO:0007096	regulation of exit from mitosis	0.000702363	0.00832951	ANLN/CDCA5/UBE2C	3
BP	GO:0071222	cellular response to lipopolysaccharide	0.000715645	0.00844115	CMPK2/CARD17/BPI/DEFA4/DEFA3/LTF/LCN2/CD274	8
BP	GO:0007127	meiosis I	0.000719651	0.00844277	ESPL1/CCNA1/PLK1/TRIP13/TOP2A/RAD51	6
BP	GO:0050000	chromosome localization	0.0007376	0.00860706	CCNB1/CDCA5/DLGAP5/KIFC1/CENPF	5
BP	GO:0034080	CENP-A containing nucleosome assembly	0.000755717	0.00872515	H4C8/CENPA/HJURP/CENPM	4
BP	GO:0061641	CENP-A containing chromatin organization	0.000755717	0.00872515	H4C8/CENPA/HJURP/CENPM	4
BP	GO:0070316	regulation of G0 to G1 transition	0.000823433	0.00945693	CHEK1/E2F1/RRM2/RAD51	4
BP	GO:1903555	regulation of tumor necrosis factor superfamily cytokine production	0.000881292	0.0100684	LEP/MMP8/IFIH1/BPI/AZU1/LTF/CD274	7
BP	GO:0071219	cellular response to molecule of bacterial origin	0.000890055	0.0101156	CMPK2/CARD17/BPI/DEFA4/DEFA3/LTF/LCN2/CD274	8
BP	GO:0035455	response to interferon-alpha	0.000950843	0.0106951	EIF2AK2/IFIT3/IFIT2	3
BP	GO:0042135	neurotransmitter catabolic process	0.000950843	0.0106951	MAOA/GLDC/MAOB	3
BP	GO:0045023	G0 to G1 transition	0.000971516	0.0108715	CHEK1/E2F1/RRM2/RAD51	4
BP	GO:0051302	regulation of cell division	0.00105141	0.0115956	CDC6/AURKB/E2F7/E2F8/PLK1/KIF18B/KIF20A	7
BP	GO:0071706	tumor necrosis factor superfamily cytokine production	0.00105141	0.0115956	LEP/MMP8/IFIH1/BPI/AZU1/LTF/CD274	7
BP	GO:0031055	chromatin remodeling at centromere	0.00105216	0.0115956	H4C8/CENPA/HJURP/CENPM	4
BP	GO:0007063	regulation of sister chromatid cohesion	0.00109343	0.0118705	CDCA5/ESPL1/BUB1	3
BP	GO:0071359	cellular response to dsRNA	0.00109343	0.0118705	IFIH1/IFIT1/CAV1	3
BP	GO:1904666	regulation of ubiquitin protein ligase activity	0.00109343	0.0118705	PLK1/CDC20/UBE2C	3
BP	GO:0051445	regulation of meiotic cell cycle	0.00113739	0.0122867	CDC25A/CDC20/TRIP13/TTK	4
BP	GO:2000134	negative regulation of G1/S transition of mitotic cell cycle	0.00116326	0.0125043	CCNB1/CDK1/GTSE1/E2F7/E2F8/E2F1	6
BP	GO:0007064	mitotic sister chromatid cohesion	0.00124882	0.013293	HASPIN/CDCA5/CDC20	3
BP	GO:0034123	positive regulation of toll-like receptor signaling pathway	0.00124882	0.013293	CAV1/LTF/RSAD2	3
BP	GO:0048146	positive regulation of fibroblast proliferation	0.00132216	0.0140053	CCNB1/CDC6/CCNA2/E2F1	4
BP	GO:0048469	cell maturation	0.00142179	0.0149179	CCNB1/SEPTIN4/GLDN/TYMS/EPAS1/BHLHA15/TRIP13	7
BP	GO:0006998	nuclear envelope organization	0.00142198	0.0149179	CCNB1/CDK1/CCNB2/PLK1	4
BP	GO:1902807	negative regulation of cell cycle G1/S phase transition	0.00148024	0.0154547	CCNB1/CDK1/GTSE1/E2F7/E2F8/E2F1	6
BP	GO:0045840	positive regulation of mitotic nuclear division	0.00152694	0.0158664	CDCA5/DLGAP5/ESPL1/UBE2C	4
BP	GO:0051307	meiotic chromosome separation	0.0015997	0.0165437	ESPL1/TOP2A/TTK	3
BP	GO:0006336	DNA replication-independent nucleosome assembly	0.00163717	0.0168513	H4C8/CENPA/HJURP/CENPM	4
BP	GO:0060333	interferon-gamma-mediated signaling pathway	0.00165895	0.0169953	OAS1/OAS2/TRIM22/OAS3/OASL	5
BP	GO:0034724	DNA replication-independent nucleosome organization	0.00175282	0.0178731	H4C8/CENPA/HJURP/CENPM	4
BP	GO:0071216	cellular response to biotic stimulus	0.00176204	0.0178835	CMPK2/CARD17/BPI/DEFA4/DEFA3/LTF/LCN2/CD274	8
BP	GO:0051310	metaphase plate congression	0.00200089	0.0202137	CCNB1/CDCA5/KIFC1/CENPF	4
BP	GO:0019229	regulation of vasoconstriction	0.00213359	0.0214549	LEP/CD38/CAV1/SMTNL1	4
BP	GO:0006302	double-strand break repair	0.00239862	0.0238646	FOXM1/CDCA5/CDC45/H4C8/CHEK1/POLQ/TRIP13/RAD51	8
BP	GO:0051817	modulation of process of other organism involved in symbiotic interaction	0.00240307	0.0238646	IFI27/EIF2AK2/CAV2/PTX3/LTF	5
BP	GO:0043486	histone exchange	0.00241697	0.0238646	H4C8/CENPA/HJURP/CENPM	4
BP	GO:0051851	modulation by host of symbiont process	0.00241697	0.0238646	IFI27/CAV2/PTX3/LTF	4
BP	GO:0010800	positive regulation of peptidyl-threonine phosphorylation	0.00247261	0.024304	TRIM6/PLK1/AZU1	3
BP	GO:0050830	defense response to Gram-positive bacterium	0.00262177	0.0256546	DEFA4/H2BC7/CAMP/DEFA3/H2BC8	5
BP	GO:0032091	negative regulation of protein binding	0.00285456	0.0278079	AURKB/PCSK9/IFIT2/IFIT1/CAV1	5
BP	GO:0010458	exit from mitosis	0.00300029	0.0289688	ANLN/CDCA5/UBE2C	3
BP	GO:0040020	regulation of meiotic nuclear division	0.00300029	0.0289688	CDC20/TRIP13/TTK	3
BP	GO:0042133	neurotransmitter metabolic process	0.00322943	0.0309754	MAOA/MMP8/GLDC/PTX3/MAOB/CAV1	6
BP	GO:0070192	chromosome organization involved in meiotic cell cycle	0.00323651	0.0309754	BUB1/TRIP13/BUB1B/RAD51	4
BP	GO:0045907	positive regulation of vasoconstriction	0.00328806	0.0313314	CD38/CAV1/SMTNL1	3
BP	GO:0061025	membrane fusion	0.0033348	0.0316386	OTOF/MX1/DOC2B/CAV2/SAMD9L/SAMD9	6
BP	GO:0051785	positive regulation of nuclear division	0.0034205	0.0323112	CDCA5/DLGAP5/ESPL1/UBE2C	4
BP	GO:0040001	establishment of mitotic spindle localization	0.00359219	0.0336417	ESPL1/PLK1/CENPA	3
BP	GO:0051443	positive regulation of ubiquitin-protein transferase activity	0.00359219	0.0336417	PLK1/CDC20/UBE2C	3
BP	GO:0007135	meiosis II	0.00374161	0.033738	BUB1/BUB1B	2
BP	GO:0032875	regulation of DNA endoreduplication	0.00374161	0.033738	E2F7/E2F8	2
BP	GO:0034058	endosomal vesicle fusion	0.00374161	0.033738	SAMD9L/SAMD9	2
BP	GO:0039530	MDA-5 signaling pathway	0.00374161	0.033738	IFIH1/DDX60	2
BP	GO:0051231	spindle elongation	0.00374161	0.033738	AURKB/KIF4A	2
BP	GO:0051255	spindle midzone assembly	0.00374161	0.033738	AURKB/KIF4A	2
BP	GO:0061983	meiosis II cell cycle process	0.00374161	0.033738	BUB1/BUB1B	2
BP	GO:1902101	positive regulation of metaphase/anaphase transition of cell cycle	0.00374161	0.033738	DLGAP5/ESPL1	2
BP	GO:1903862	positive regulation of oxidative phosphorylation	0.00374161	0.033738	CCNB1/CDK1	2
BP	GO:0032508	DNA duplex unwinding	0.00378764	0.0340125	GINS1/CDC45/POLQ/TOP2A/RAD51	5
BP	GO:0043276	anoikis	0.00391294	0.0349937	CEACAM6/E2F1/CAV1	3
BP	GO:0032680	regulation of tumor necrosis factor production	0.0040217	0.0358195	LEP/MMP8/IFIH1/BPI/AZU1/LTF	6
BP	GO:0009262	deoxyribonucleotide metabolic process	0.0042506	0.0377043	CMPK2/TYMS/RRM2	3
BP	GO:0032640	tumor necrosis factor production	0.004402	0.0387409	LEP/MMP8/IFIH1/BPI/AZU1/LTF	6
BP	GO:0043393	regulation of protein binding	0.00443793	0.0387409	BAMBI/AURKB/PCSK9/PLK1/IFIT2/IFIT1/CAV1	7
BP	GO:0032276	regulation of gonadotropin secretion	0.004545	0.0387409	LEP/INHBA	2
BP	GO:0035404	histone-serine phosphorylation	0.004545	0.0387409	CCNB1/AURKB	2
BP	GO:0035457	cellular response to interferon-alpha	0.004545	0.0387409	IFIT3/IFIT2	2
BP	GO:0042023	DNA endoreduplication	0.004545	0.0387409	E2F7/E2F8	2
BP	GO:0045835	negative regulation of meiotic nuclear division	0.004545	0.0387409	TRIP13/TTK	2
BP	GO:0055015	ventricular cardiac muscle cell development	0.004545	0.0387409	CCNB1/CDK1	2
BP	GO:0098814	spontaneous synaptic transmission	0.004545	0.0387409	RPH3A/DOC2B	2
BP	GO:1905820	positive regulation of chromosome separation	0.004545	0.0387409	DLGAP5/ESPL1	2
BP	GO:0045740	positive regulation of DNA replication	0.00460542	0.0391032	CDK1/E2F7/E2F8	3
BP	GO:0050688	regulation of defense response to virus	0.00491101	0.0414632	TRIM6/HERC5/DDX60/IFIT1	4
BP	GO:0031398	positive regulation of protein ubiquitination	0.00492138	0.0414632	SEPTIN4/PLK1/CDC20/UBE2C/CAV1	5
CC	GO:0000793	condensed chromosome	2.09886e-13	3.09808e-11	CCNB1/BIRC5/AURKB/ZWINT/CDCA5/MKI67/PLK1/CHEK1/CENPA/BUB1/SKA1/TOP2A/SPC25/BUB1B/HJURP/RAD51/NCAPG/CENPM/CENPF	19
CC	GO:0035580	specific granule lumen	3.36363e-13	3.09808e-11	CHIT1/GGH/MMP8/OLFM4/BPI/DEFA4/CAMP/PTX3/CRISP3/TCN1/LTF/LCN2	12
CC	GO:0000779	condensed chromosome, centromeric region	3.83244e-12	2.35325e-10	CCNB1/BIRC5/AURKB/ZWINT/PLK1/CENPA/BUB1/SKA1/SPC25/BUB1B/HJURP/NCAPG/CENPM/CENPF	14
CC	GO:0005819	spindle	8.24553e-12	3.03783e-10	TPX2/CCNB1/BIRC5/CDK1/CDC6/AURKB/KIF4A/HASPIN/DLGAP5/CKAP2L/ESPL1/PLK1/KIF18B/KIFC1/CDC20/SKA1/SHCBP1/BUB1B/KIF20A/TTK/CENPF	21
CC	GO:0098687	chromosomal region	8.24553e-12	3.03783e-10	CCNB1/BIRC5/CDK1/ORC1/AURKB/ZWINT/CDCA5/H4C8/PLK1/CHEK1/CENPA/BUB1/SKA1/SPC25/BUB1B/HJURP/RAD51/TTK/NCAPG/CENPM/CENPF	21
CC	GO:0042581	specific granule	2.00777e-11	6.16419e-10	OLR1/CHIT1/GGH/MMP8/OLFM4/BPI/DEFA4/CEACAM8/CAMP/PTX3/CRISP3/TCN1/LTF/LCN2/TARM1	15
CC	GO:0000776	kinetochore	2.44852e-11	6.28996e-10	CCNB1/BIRC5/AURKB/ZWINT/PLK1/CENPA/BUB1/SKA1/SPC25/BUB1B/HJURP/TTK/CENPM/CENPF	14
CC	GO:0000775	chromosome, centromeric region	2.73164e-11	6.28996e-10	CCNB1/BIRC5/AURKB/ZWINT/CDCA5/PLK1/CENPA/BUB1/SKA1/SPC25/BUB1B/HJURP/TTK/NCAPG/CENPM/CENPF	16
CC	GO:0000777	condensed chromosome kinetochore	2.1637e-10	4.42862e-09	CCNB1/BIRC5/ZWINT/PLK1/CENPA/BUB1/SKA1/SPC25/BUB1B/HJURP/CENPM/CENPF	12
CC	GO:0000940	condensed chromosome outer kinetochore	1.50499e-09	2.67421e-08	CCNB1/PLK1/BUB1/SKA1/BUB1B/CENPF	6
CC	GO:1904724	tertiary granule lumen	1.59688e-09	2.67421e-08	CHIT1/GGH/MMP8/OLFM4/CAMP/PTX3/CRISP3/TCN1/LTF	9
CC	GO:0070820	tertiary granule	3.6558e-09	5.61197e-08	OLR1/CHIT1/GGH/MMP8/OLFM4/CEACAM8/CAMP/PTX3/CRISP3/TCN1/LTF/SERPINB10/TARM1	13
CC	GO:0034774	secretory granule lumen	6.68093e-09	9.46691e-08	SERPING1/CHIT1/GGH/MMP8/OLFM4/BPI/DEFA4/MPO/CAMP/TXNDC5/PTX3/AZU1/CRISP3/DEFA3/TCN1/LTF/LCN2	17
CC	GO:0060205	cytoplasmic vesicle lumen	8.03343e-09	1.05703e-07	SERPING1/CHIT1/GGH/MMP8/OLFM4/BPI/DEFA4/MPO/CAMP/TXNDC5/PTX3/AZU1/CRISP3/DEFA3/TCN1/LTF/LCN2	17
CC	GO:0031983	vesicle lumen	8.80014e-09	1.08072e-07	SERPING1/CHIT1/GGH/MMP8/OLFM4/BPI/DEFA4/MPO/CAMP/TXNDC5/PTX3/AZU1/CRISP3/DEFA3/TCN1/LTF/LCN2	17
CC	GO:0000780	condensed nuclear chromosome, centromeric region	1.05346e-07	1.21287e-06	CCNB1/AURKB/PLK1/CENPA/BUB1/BUB1B	6
CC	GO:0000778	condensed nuclear chromosome kinetochore	1.67255e-07	1.81236e-06	CCNB1/PLK1/CENPA/BUB1/BUB1B	5
CC	GO:0005876	spindle microtubule	1.07495e-06	1.1001e-05	BIRC5/CDK1/AURKB/KIF4A/PLK1/KIF18B/SKA1	7
CC	GO:0005766	primary lysosome	1.63924e-06	1.50983e-05	CEACAM6/GGH/BPI/ABCA13/DEFA4/CEACAM8/MPO/TXNDC5/AZU1/DEFA3	10
CC	GO:0042582	azurophil granule	1.63924e-06	1.50983e-05	CEACAM6/GGH/BPI/ABCA13/DEFA4/CEACAM8/MPO/TXNDC5/AZU1/DEFA3	10
CC	GO:0000794	condensed nuclear chromosome	3.48398e-06	3.05612e-05	CCNB1/AURKB/PLK1/CHEK1/CENPA/BUB1/BUB1B/RAD51	8
CC	GO:0030496	midbody	4.40698e-06	3.69005e-05	ANLN/BIRC5/CDK1/AURKB/KIF4A/CEP55/PLK1/SHCBP1/KIF20A/CENPF	10
CC	GO:0072686	mitotic spindle	7.15517e-06	5.73068e-05	TPX2/CDK1/AURKB/CKAP2L/ESPL1/KIF18B/KIFC1/SKA1	8
CC	GO:0044815	DNA packaging complex	1.06345e-05	8.16247e-05	H2BC9/H4C8/H2BC7/H2BC5/CENPA/H2BC8/NCAPG/H2BC17	8
CC	GO:0000922	spindle pole	2.02814e-05	0.000149442	TPX2/CCNB1/CDC6/AURKB/DLGAP5/CKAP2L/PLK1/CDC20/CENPF	9
CC	GO:0000307	cyclin-dependent protein kinase holoenzyme complex	3.88025e-05	0.000274916	CCNB1/CDK1/CCNA2/CCNB2/CCNA1	5
CC	GO:0000786	nucleosome	5.68862e-05	0.000388112	H2BC9/H4C8/H2BC7/H2BC5/CENPA/H2BC8/H2BC17	7
CC	GO:0032993	protein-DNA complex	0.000102751	0.000675996	GINS1/H2BC9/CDC45/H4C8/H2BC7/H2BC5/CENPA/H2BC8/H2BC17	9
CC	GO:0005775	vacuolar lumen	0.000186459	0.0011467	NSG2/GGH/BPI/MPO/TXNDC5/AZU1/DEFA3/SDC1	8
CC	GO:0035578	azurophil granule lumen	0.000186749	0.0011467	GGH/BPI/MPO/TXNDC5/AZU1/DEFA3	6
CC	GO:0051233	spindle midzone	0.000251504	0.00149451	CDC6/AURKB/PLK1/KIF18B	4
CC	GO:0030667	secretory granule membrane	0.000426756	0.00245665	CEACAM6/CD38/OLR1/CAV2/ABCA13/CEACAM8/AZU1/CAV1/SERPINB10/TARM1	10
CC	GO:0005680	anaphase-promoting complex	0.000881678	0.00492165	CDC20/UBE2C/BUB1B	3
CC	GO:1902554	serine/threonine protein kinase complex	0.0012746	0.00690571	CCNB1/CDK1/CCNA2/CCNB2/CCNA1	5
CC	GO:0005874	microtubule	0.0015804	0.00815488	TPX2/BIRC5/CDK1/AURKB/KIF4A/GTSE1/PLK1/KIF18B/KIFC1/SKA1/KIF20A	11
CC	GO:0005871	kinesin complex	0.0015937	0.00815488	KIF4A/KIF18B/KIFC1/KIF20A	4
CC	GO:0035577	azurophil granule membrane	0.00194096	0.00966338	CEACAM6/ABCA13/CEACAM8/AZU1	4
CC	GO:0045171	intercellular bridge	0.00206747	0.0100223	TPX2/KIF4A/CEP55/KIF20A	4
CC	GO:0005875	microtubule associated complex	0.00275156	0.0129966	BIRC5/AURKB/KIF4A/KIF18B/KIFC1/KIF20A	6
CC	GO:1902911	protein kinase complex	0.00326108	0.0150181	CCNB1/CDK1/CCNA2/CCNB2/CCNA1	5
CC	GO:0005741	mitochondrial outer membrane	0.00593666	0.0265392	WASF1/MAOA/SEPTIN4/IFI27/MAOB/RSAD2	6
CC	GO:1990023	mitotic spindle midzone	0.00605095	0.0265392	AURKB/KIF18B	2
CC	GO:0001518	voltage-gated sodium channel complex	0.00701729	0.029573	SCN5A/SCN9A	2
CC	GO:0000152	nuclear ubiquitin ligase complex	0.00706372	0.029573	CDC20/UBE2C/BUB1B	3
CC	GO:0031616	spindle pole centrosome	0.00804856	0.0322311	AURKB/DLGAP5	2
CC	GO:0045120	pronucleus	0.00804856	0.0322311	CCNA2/CENPF	2
MF	GO:0035173	histone kinase activity	4.742e-07	0.000144257	CCNB1/CDK1/AURKB/HASPIN/CHEK1	5
MF	GO:0003725	double-stranded RNA binding	8.57536e-06	0.00130436	OAS1/EIF2AK2/OAS2/IFIH1/OAS3/DDX60/OASL	7
MF	GO:0003688	DNA replication origin binding	8.04602e-05	0.00815895	ORC1/CDC6/MCM10/CDC45	4

## Sheet: TFEA results
Term	P-value	Adjusted P-value	Old P-value	Old Adjusted P-value	Odds Ratio	Combined Score	Genes
E2F4 ENCODE	1.27e-36	1.18e-34	0	0	12.7186	1051.22	TOP2A;HJURP;BUB1B;MCM10;MKI67;FOXM1;CDC20;EXO1;CHEK1;PBK;MYBL2;GTSE1;CEP55;DLGAP5;CKAP2L;CDC25A;CCNA2;DEPDC1B;ESPL1;DEPDC1;BIRC5;KIF20A;DTL;CDCA2;CDCA3;CDCA5;TROAP;NCAPG;TTK;TYMS;IQGAP3;SKA1;AURKB;CDC45;ORC1;E2F1;CLSPN;BUB1;E2F7;E2F8;GINS1;POLQ;RRM2;PLK1;CDC6;SHCBP1;TICRR;TPX2;CENPF;KIF18B;RAD51;KIF4A;CDK1;CENPM;TRIP13;SPC25
FOXM1 ENCODE	2.17e-20	1.01e-18	0	0	29.7274	1345.98	CDCA2;CKAP2L;UBE2C;TROAP;PLK1;HJURP;MKI67;CENPA;CDC20;CCNA2;CCNB2;TPX2;CCNB1;CENPF;KIF18B;CDK1;KIF20A;GTSE1;CEP55
SIN3A ENCODE	6.77e-13	2.1e-11	0	0	4.57999	128.334	CDCA5;HJURP;BUB1B;NCAPG;MCM10;HMMR;IQGAP3;AURKB;CDC20;CCNB2;CCNB1;ORC1;EXO1;PBK;CLSPN;GTSE1;BUB1;CEP55;DLGAP5;E2F8;POLQ;RRM2;CKAP2L;PLK1;CDC6;SHCBP1;CDC25A;SAP30;CCNA2;TPX2;ANLN;CENPF;KIF18B;RAD51;CDK1;BIRC5;KIF20A;TRIP13;DTL
NFYA ENCODE	1.5e-05	0.000349	0	0	2.26927	25.2051	TOP2A;CDCA2;CDCA3;TROAP;HJURP;MCM10;TTK;HMMR;CENPA;AURKB;CDC20;CCNB2;CCNB1;CDC45;E2F1;CLSPN;GTSE1;BUB1;DLGAP5;E2F7;GINS1;RRM2;CKAP2L;PYCR1;DHCR24;CDC6;SHCBP1;CDC25A;ZWINT;TICRR;CCNA2;TPX2;DEPDC1B;CENPF;KIF18B;ESPL1;CDK1;CENPM;KIF20A;DTL;SPC25
E2F1 CHEA	4.83e-05	0.000898	0	0	2.89974	28.8197	RRM2;UBE2C;CDCA5;BUB1B;CDC6;SHCBP1;CDC25A;AURKB;TICRR;CCNB2;TRIM6;ESPL1;EXO1;OAS3;CHEK1;CENPM;CLSPN;DLGAP5;E2F7;TXNDC5;E2F8
NFYB ENCODE	0.00015	0.00231798	0	0	1.86743	16.4482	TOP2A;GLDC;HJURP;MCM10;MKI67;CDC20;GTSE1;CEP55;DLGAP5;CKAP2L;CDC25A;CCNA2;DEPDC1B;ESPL1;DEPDC1;KIF20A;DTL;CDCA2;CDCA3;SAMD9;EPAS1;TROAP;RGS16;TTK;HMMR;CENPA;AURKB;CCNB2;CCNB1;CDC45;E2F1;CLSPN;BUB1;E2F7;E2F8;GINS1;RRM2;UBE2C;PLK1;PYCR1;DHCR24;CDC6;SHCBP1;ZWINT;TICRR;TPX2;CENPF;KIF18B;BAMBI;KIF4A;CDK1;CENPM;ZCCHC2;APOBEC3B;SPC25
IRF3 ENCODE	0.00354259	0.0470659	0	0	2.41779	13.6433	TOP2A;CDCA2;RRM2;CDCA3;UBE2C;CKAP2L;CDC6;CENPA;TICRR;TPX2;CENPM;BUB1;DLGAP5;SPC25
E2F6 ENCODE	0.0081018	0.0941834	0	0	1.57111	7.56595	CDCA3;EPAS1;RGS16;NCAPG;PCSK9;MCM10;TYMS;CENPA;AURKB;CDC45;CHEK1;PBK;E2F1;MYBL2;CLSPN;SCN5A;CRYM;CEP55;E2F7;TXNDC5;E2F8;GINS1;RRM2;CAV2;PYCR1;DHCR24;CDC6;CDC25A;TICRR;ANLN;DEPDC1B;CENPF;RAD51;CDK1;DEPDC1;CMPK2;SDC1;BIRC5;CENPM;TRIP13;KIAA1958;DTL;APOBEC3B
AR CHEA	0.0130318	0.122392	0	0	1.87527	8.13935	CA12;CDCA2;MAOA;CAV1;MCM10;CDC25A;RHOBTB1;ZWINT;FRMD3;CCNA2;TPX2;CCNA1;CEACAM6;LEP;DEPDC1;SPATS2L;KIF20A;DTL
SOX2 CHEA	0.0131604	0.122392	0	0	2.0499	8.8772	TOP2A;EPAS1;CDCA5;HMMR;ZWINT;SAP30;TICRR;ACOXL;BAMBI;HESX1;PBK;CD38;SCN5A;LY6E
FOS ENCODE	0.0156586	0.132387	0	0	2.12976	8.85283	TOP2A;TPX2;CENPF;CDCA2;KIF18B;RRM2;CDCA3;HJURP;CENPM;HMMR;CENPA;TICRR
TP63 CHEA	0.0193158	0.149697	0	0	1.71323	6.76184	CA12;EPAS1;CAV2;HTRA3;RGS16;TACSTD2;PCSK9;INHBA;FOXM1;CENPA;AURKB;ANLN;OAS2;OAS3;SCN9A;SPATS2L;SDC1;ERG;WASF1;KIAA1958;CAMP
IRF8 CHEA	0.0260917	0.186656	0	0	3.72064	13.566	IFIH1;CD274;EPSTI1;USP18
VDR CHEA	0.0334691	0.222331	0	0	4.45778	15.1436	CD274;EPSTI1;CAMP
IRF1 ENCODE	0.0977482	0.606039	0	0	2.10562	4.89633	CDC45;SAMD9;EXO1;MX1;CMPK2
SALL4 CHEA	0.112377	0.653191	0	0	1.8696	4.08676	ANLN;E2F1;MCM10;MYBL2;TTK;CDC6
RFX5 ENCODE	0.147933	0.809278	0	0	1.5802	3.01976	CCNB1;CDCA2;IFI27;E2F1;MCM10;ZCCHC2;AURKB;TICRR
CBX3 ENCODE	0.172487	0.853175	0	0	2.7303	4.79833	SCN5A;APOBEC3B
TP53 CHEA	0.174305	0.853175	0	0	1.72514	3.01374	ZNF608;RRM2;KCNN3;TRIM22;E2F7
MYOD1 ENCODE	0.199058	0.903812	0	0	1.98733	3.20786	SCN5A;RHOBTB1;DUSP13
SP1 ENCODE	0.209141	0.903812	0	0	1.40054	2.19148	TOP2A;CDCA2;CDC45;CDCA3;HJURP;CENPA;BUB1;TICRR;SPC25
SIX5 ENCODE	0.213805	0.903812	0	0	1.30984	2.02069	CDCA3;BUB1B;IQGAP3;CDC25A;SAP30;TPX2;CDC45;RAD51;ESPL1;EXO1;BIRC5;WASF1;SPC25
ZEB1 ENCODE	0.257002	0.999995	0	0	2.07135	2.81429	IFIH1;ETV7
PPARD CHEA	0.270939	0.999995	0	0	1.53627	2.00615	SCN9A;BIRC5;NEXN;E2F8
GATA1 CHEA	0.331275	0.999995	0	0	1.21862	1.34634	DEPDC1B;ZNF608;RSAD2;SH3TC2;CAV2;CMPK2;ERG;KCNN3;DTL
STAT3 ENCODE	0.356546	0.999995	0	0	1.20389	1.24156	HERC5;CDC45;RRM2;CDCA5;RGS16;KIF20A;ARNTL2;SAP30
ESR1 CHEA	0.417823	0.999995	0	0	1.41379	1.23381	CA12;DHCR24
SP2 ENCODE	0.438921	0.999995	0	0	1.09355	0.900471	TOP2A;TPX2;POLQ;CDCA2;CDCA3;CKAP2L;CENPM;CENPA;DLGAP5;TICRR
SMAD4 CHEA	0.455541	0.999995	0	0	1.1156	0.877162	ACOXL;ZNF608;BAMBI;EXO1;KCNN3;CEP55
NANOG CHEA	0.473406	0.999995	0	0	1.09414	0.818197	ZNF608;CDCA3;CKAP2L;HESX1;CD38;MYBL2
ZBTB33 ENCODE	0.474178	0.999995	0	0	1.08189	0.807273	CDC20;TROAP;BUB1B;NCAPG;GGH;EIF2AK2;SPC25
ZNF384 ENCODE	0.515472	0.999995	0	0	1.03846	0.68816	RAD51;CDCA5;CHEK1;CLSPN;CDC6;CDC25A;SAP30
MAX ENCODE	0.552743	0.999995	0	0	0.98972	0.586768	PLK1;BUB1B;PYCR1;AURKB;SAP30;CDC20;ANLN;CCNB1;CENPF;RAD51;E2F1;SDC1;BIRC5;CENPM;KIF20A;SCN5A;TRIP13;CEP55;TXNDC5
TRIM28 CHEA	0.580803	0.999995	0	0	1.03021	0.559759	BAMBI;GGH
SUZ12 CHEA	0.599672	0.999995	0	0	0.959328	0.490574	ANKRD34B;EPAS1;CAV1;TACSTD2;PCSK9;NEXN;DOC2B;GLDN;RHOBTB1;FRMD3;SPATS2L;PTX3;SCN5A;CRYM;BEND7
NFE2L2 CHEA	0.608006	0.999995	0	0	0.949127	0.472258	POLQ;MAOA;CKAP2L;PTX3;WASF1;IFIT3;ZWINT;TXNDC5;OASL
SUZ12 ENCODE	0.62406	0.999995	0	0	1.03005	0.485677	EPAS1
TCF7L2 ENCODE	0.629864	0.999995	0	0	0.9245	0.427352	GLDC;EPAS1;GGH;TRIP13;ZWINT
SPI1 CHEA	0.647087	0.999995	0	0	0.916645	0.398992	KIF18B;RAD51;BAMBI;KIFC1;CDCA5;BIRC5;DTL;RHOBTB1;TICRR
ZKSCAN1 ENCODE	0.673233	0.999995	0	0	0.899525	0.355909	ARNTL2
TRIM28 ENCODE	0.673233	0.999995	0	0	0.899525	0.355909	APOBEC3B
SPI1 ENCODE	0.674798	0.999995	0	0	0.905195	0.356051	SAMD9L;SUCNR1;NCAPG;IQGAP3;IFIH1;ANLN;KIF18B;RAD51;OAS3;E2F1;SCN5A;CEP55;CAMP
POU5F1 CHEA	0.698064	0.999995	0	0	0.8252	0.296614	CDCA5;MYBL2
FLI1 ENCODE	0.722282	0.999995	0	0	0.825581	0.268594	CDC45;ORC1;ESPL1;KIFC1;HJURP
NFIC ENCODE	0.732469	0.999995	0	0	0.770867	0.239997	HERC5;CDCA3
EGR1 ENCODE	0.735442	0.999995	0	0	0.799478	0.245667	ESPL1;EPAS1;MKI67;APOBEC3B
CEBPB ENCODE	0.738945	0.999995	0	0	0.747644	0.226186	PYCR1
REST CHEA	0.753081	0.999995	0	0	0.834421	0.236627	RPH3A;CCNB2;SUCNR1;RAD51;ERG;OLFM4;WASF1;GLDN;E2F7;SAP30
CREB1 ENCODE	0.769449	0.999995	0	0	0.854264	0.223886	CDCA3;MAOA;CKAP2L;CDCA5;TROAP;MCM10;TTK;CENPA;SHCBP1;TICRR;CCNA2;TPX2;DEPDC1B;CDC45;ORC1;EXO1;DTL;ZCCHC2
MYC CHEA	0.780065	0.999995	0	0	0.747497	0.185662	ANLN;CDCA5;MYBL2;KIF20A
CREB1 CHEA	0.78882	0.999995	0	0	0.810942	0.19237	CCNA2;RAD51;UBE2C;EXO1;TROAP;E2F1;WASF1;ZCCHC2;CEP55;SAP30;TICRR
EGR1 CHEA	0.791386	0.999995	0	0	0.680948	0.159321	MAOB;CRYM
FOXP2 ENCODE	0.810156	0.999995	0	0	0.602985	0.126945	SAP30
CEBPD ENCODE	0.813378	0.999995	0	0	0.727252	0.15022	ANLN;ORC1;BAMBI;SCN9A;PYCR1
EZH2 ENCODE	0.822787	0.999995	0	0	0.633587	0.123586	FRMD3;ORC1
RAD21 ENCODE	0.8343	0.999995	0	0	0.755605	0.136887	POLQ;BAMBI;SDC1;MCM10;KIF20A;SCN5A;CEACAM8;WASF1;DTL
FOSL2 ENCODE	0.839652	0.999995	0	0	0.546823	0.0955669	ANLN
ZBTB7A ENCODE	0.869326	0.999995	0	0	0.770628	0.107916	GINS1;CDCA2;RRM2;CKAP2L;PYCR1;NEXN;TYMS;ANLN;ESPL1;BAMBI;SCN9A;SDC1;CENPM;TRIP13;DTL;TXNDC5
PPARG CHEA	0.875583	0.999995	0	0	0.597466	0.0793824	ZNF608;CAV2;SIGLEC1
STAT5A ENCODE	0.88673	0.999995	0	0	0.458747	0.055148	PBK
NELFE ENCODE	0.88779	0.999995	0	0	0.456755	0.0543628	RRM2
EZH2 CHEA	0.890912	0.999995	0	0	0.45088	0.052081	RHOBTB1
UBTF ENCODE	0.896777	0.999995	0	0	0.710036	0.0773574	CCNA2;NCAPG;SDC1;DHCR24;MYBL2;MKI67;ZCCHC2;E2F7;TXNDC5;E2F8;TICRR
NRF1 ENCODE	0.897036	0.999995	0	0	0.725727	0.0788568	CDCA2;CDCA3;HMMR;CDC6;SKA1;ZWINT;SAP30;TICRR;TPX2;ANLN;CCNB1;GTSE1;DTL
BRCA1 ENCODE	0.898877	0.999995	0	0	0.775725	0.0826995	CDCA2;EPAS1;CDCA5;TROAP;BUB1B;NCAPG;GGH;EIF2AK2;AURKB;SAP30;CDC20;CCNA2;CCNB1;KIF18B;RAD51;ESPL1;CENPM;TRIP13;WASF1;GTSE1;BUB1;ZCCHC2;TXNDC5;SPC25
PBX3 ENCODE	0.906865	0.999995	0	0	0.665027	0.0650145	TOP2A;CDCA2;CDCA3;UBE2C;BAMBI;CENPA;CDC25A;DLGAP5
TCF3 CHEA	0.908446	0.999995	0	0	0.63067	0.0605571	OAS2;E2F1;CD38;CENPM;MYBL2;TICRR
HNF4A ENCODE	0.909901	0.999995	0	0	0.661106	0.0624215	MAOB;MZB1;SPATS2L;SDC1;TRIP13;TYMS;USP18;TXNDC5
GATA2 CHEA	0.930044	0.999995	0	0	0.548084	0.0397492	CMPK2;DHCR24;BEND7;DTL
TAF7 ENCODE	0.93815	0.999995	0	0	0.496265	0.0316843	CHEK1;CLSPN;CDC6
SRF ENCODE	0.939166	0.999995	0	0	0.355942	0.0223401	TICRR
CHD1 ENCODE	0.944235	0.999995	0	0	0.484469	0.027799	ANLN;RRM2;AURKB
FOXA2 ENCODE	0.948184	0.999995	0	0	0.336439	0.0179009	DHCR24
KLF4 CHEA	0.953932	0.999995	0	0	0.532728	0.0251249	ANLN;BIRC5;MYBL2;TRIP13;DTL
NR2C2 ENCODE	0.962423	0.999995	0	0	0.303133	0.0116103	TRIP13
ZMIZ1 ENCODE	0.972086	0.999995	0	0	0.45911	0.0129976	CCNB1;BIRC5;CENPA;DUSP13
REST ENCODE	0.972505	0.999995	0	0	0.276477	0.00770813	RPH3A
MYC ENCODE	0.973643	0.999995	0	0	0.549091	0.0146663	CCNB1;RRM2;BUB1B;PYCR1;BIRC5;HMMR;TRIP13;DTL
USF2 ENCODE	0.980258	0.999995	0	0	0.433572	0.00864518	ANLN;DEPDC1B;DEPDC1;FOXM1
USF1 ENCODE	0.980346	0.999995	0	0	0.510986	0.0101432	HERC5;ANLN;CCNB1;DEPDC1;E2F1;CENPM;FOXM1
RUNX1 CHEA	0.982502	0.999995	0	0	0.482156	0.00851126	HERC5;CDCA5;DHCR24;ZCCHC2;SAP30;LY6E
TCF3 ENCODE	0.985386	0.999995	0	0	0.373745	0.00550228	CMPK2;E2F7;SAP30
SMC3 ENCODE	0.986543	0.999995	0	0	0.440264	0.00596501	POLQ;BAMBI;BPI;SCN5A;DTL
CTCF ENCODE	0.987462	0.999995	0	0	0.517795	0.00653342	BAMBI;CAV1;SDC1;BPI;SCN5A;WASF1;DTL;DUSP13;APOBEC3B
GABPA ENCODE	0.98812	0.999995	0	0	0.541645	0.00647304	TPX2;POLQ;CDC45;CDCA3;ORC1;EXO1;CDCA5;TRIP13;WASF1;KIAA1958;IQGAP3
RELA ENCODE	0.989465	0.999995	0	0	0.217526	0.00230373	IFIH1
ELF1 ENCODE	0.997236	0.999995	0	0	0.486868	0.0013475	POLQ;KIF18B;CDC45;RAD51;EXO1;CDCA5;TTK;WASF1;GTSE1;IQGAP3;CEP55;E2F8
YY1 ENCODE	0.998688	0.999995	0	0	0.471004	0.000618	CDCA3;TROAP;BUB1B;MCM10;FOXM1;SHCBP1;CCNA2;CDC45;ORC1;BIRC5;KIF20A;DTL;SPC25
RCOR1 ENCODE	0.998692	0.999995	0	0	0.148189	0.000194	ZCCHC2
BCLAF1 ENCODE	0.999688	0.999995	0	0	0.12126	3.78e-05	CDCA3
ATF2 ENCODE	0.999896	0.999995	0	0	0.377708	3.94e-05	CDC20;RAD51;ORC1;MAOA;EXO1;CHEK1;NCAPG;MCM10;HMMR;TYMS;DTL
PML ENCODE	0.999968	0.999995	0	0	0.188552	6.09e-06	DEPDC1B;CDK1;CLSPN
TAF1 ENCODE	0.999995	0.999995	0	0	0.223105	1.04e-06	POLQ;ORC1;CHEK1;NCAPG;KIF20A;FOXM1;DTL;ZCCHC2

## Sheet: GSEA results of GSE189990
ID	Description	setSize	enrichmentScore	NES	pvalue	p.adjust	qvalues	rank	leading_edge	core_enrichment	phenotype
BLANCO_MELO_BRONCHIAL_EPITHELIAL_CELLS_INFLUENZA_A_DEL_NS1_INFECTION_DN	BLANCO_MELO_BRONCHIAL_EPITHELIAL_CELLS_INFLUENZA_A_DEL_NS1_INFECTION_DN	70	0.595942	2.83161	1e-10	3.71351e-09	2.86486e-09	562	tags=73%, list=26%, signal=56%	ZNF608/SHCBP1/BIRC5/PLK1/CDT1/KIF2C/CDC6/HJURP/ORC1/GINS2/MCM10/CDC45/AURKB/NEK2/TMCC2/KIF20A/TTK/FAM111B/CDCA2/CDCA5/E2F8/RAD51/FOXM1/DEPDC1B/RRM2/BUB1B/CDCA3/CDC25A/EXO1/CDCA8/DTL/E2F1/PKMYT1/MYBL2/OIP5/NUF2/SPAG5/GINS4/UHRF1/TK1/CCNB2/CEP55/ANLN/UBE2C/CENPM/PHGDH/ZWINT/CLSPN/HMMR/CENPF/PLK4	covid
DEURIG_T_CELL_PROLYMPHOCYTIC_LEUKEMIA_DN	DEURIG_T_CELL_PROLYMPHOCYTIC_LEUKEMIA_DN	60	-0.499346	-3.78059	1e-10	3.71351e-09	2.86486e-09	758	tags=83%, list=35%, signal=56%	RORA/CD244/ICOS/HOPX/CD2/STAT4/NR3C2/TBX21/DYRK2/TESPA1/GZMH/CD28/HEG1/GNLY/TBC1D4/GZMB/HABP4/TRAV8-3/ADGRG1/TRAV21/CD8A/TRBC2/TRAV9-2/TGFBR3/GZMA/TRAV13-1/PRF1/CD3D/KLRD1/AKR1C3/GZMK/TRAV13-2/SYTL2/TRBC1/TRAV36DV7/IL2RB/ABCB1/TRAV8-6/KLRF1/CRTAM/TCAF1/IFNG/KLRB1/XCL1/CD160/KLRC1/NAP1L2/TRDC/NAP1L3/CACNA2D2	control
FISCHER_DREAM_TARGETS	FISCHER_DREAM_TARGETS	116	0.533155	2.72896	1e-10	3.71351e-09	2.86486e-09	639	tags=66%, list=30%, signal=49%	SHCBP1/BIRC5/PLK1/CDT1/KIF2C/CDC6/HJURP/ORC1/CDK1/CDC20/GINS2/MCM10/RAD51AP1/CDC45/AURKB/NEK2/TRIP13/SAPCD2/KIF20A/TTK/GGH/FAM111B/CDCA2/CDCA5/E2F8/RAD51/BUB1/CCNF/FOXM1/DEPDC1B/RRM2/BUB1B/CENPA/ESCO2/CHEK1/CDCA3/CDC25A/EXO1/PBK/ORC6/CDCA8/RECQL4/DTL/E2F1/PKMYT1/MYBL2/GTSE1/OIP5/POLQ/SPC24/NUF2/DEPDC1/SPAG5/GINS4/CCNE1/UHRF1/TK1/CCNB2/CEP55/ANLN/UBE2C/CENPM/ZWINT/SPATS2/CLSPN/HMMR/HMGB3/CENPF/TPX…	covid
FLORIO_NEOCORTEX_BASAL_RADIAL_GLIA_DN	FLORIO_NEOCORTEX_BASAL_RADIAL_GLIA_DN	71	0.58044	2.75653	1e-10	3.71351e-09	2.86486e-09	777	tags=85%, list=36%, signal=56%	FN1/SHCBP1/BIRC5/PLK1/KIF2C/HJURP/CDK1/CDC20/RAD51AP1/CDC45/AURKB/NEK2/KIF20A/TTK/CDCA2/CDCA5/E2F8/BUB1/FOXM1/DEPDC1B/RRM2/BUB1B/CENPA/ESCO2/CDCA3/EXO1/PBK/CDCA8/DTL/NSUN7/MYBL2/GTSE1/POLQ/NUF2/DEPDC1/SPAG5/FSTL1/TK1/CCNB2/ANLN/UBE2C/EMP1/CENPM/PHGDH/ZWINT/HMMR/CENPF/TPX2/PLK4/SERPINE1/NCAPH/MKI67/DLGAP5/TROAP/HMGB2/MELK/TOP2A/UBE2T/SPARC/CCNB1	covid
GOBERT_OLIGODENDROCYTE_DIFFERENTIATION_UP	GOBERT_OLIGODENDROCYTE_DIFFERENTIATION_UP	112	0.516719	2.62228	1e-10	3.71351e-09	2.86486e-09	564	tags=60%, list=26%, signal=47%	FN1/SHCBP1/BIRC5/PLK1/CDT1/KIF2C/CDC6/HJURP/ORC1/CDK1/CDC20/GINS2/MCM10/RAD51AP1/CDC45/AURKB/NEK2/TRIP13/KIF20A/TTK/CDCA2/CDCA5/RAD51/BUB1/CCNF/FOXM1/DEPDC1B/RRM2/BUB1B/SLC1A3/CENPA/ESCO2/CHEK1/CDCA3/EXO1/PBK/CDCA8/RECQL4/DTL/E2F1/SERPINE2/PKMYT1/MYBL2/SLC25A10/GTSE1/OIP5/SPC24/NUF2/DEPDC1/SPAG5/CCNE1/UHRF1/FSTL1/TK1/CCNB2/CEP55/UBE2C/EMP1/CENPM/CLSPN/HMMR/ASPH/HMGB3/CENPF/TPX2/PLK4/ITGB3	covid
KOBAYASHI_EGFR_SIGNALING_24HR_DN	KOBAYASHI_EGFR_SIGNALING_24HR_DN	76	0.545932	2.62458	1e-10	3.71351e-09	2.86486e-09	639	tags=68%, list=30%, signal=50%	SHCBP1/BIRC5/PLK1/CDT1/KIF2C/CDC6/HJURP/ORC1/CDK1/CDC20/GINS2/MCM10/RAD51AP1/CDC45/AURKB/NEK2/TRIP13/TTK/E2F8/RAD51/BUB1/CCNF/RRM2/BUB1B/CENPA/TCN1/CDCA3/CDC25A/EXO1/SLCO4A1/PBK/ORC6/CDCA8/DTL/E2F1/PKMYT1/MYBL2/GTSE1/DEPDC1/SPAG5/TK1/CEP55/UBE2C/CENPM/ZWINT/HMMR/TPX2/PLK4/ELL2/NCAPH/MKI67/DLGAP5	covid
MARSON_BOUND_BY_E2F4_UNSTIMULATED	MARSON_BOUND_BY_E2F4_UNSTIMULATED	84	0.561446	2.74858	1e-10	3.71351e-09	2.86486e-09	562	tags=67%, list=26%, signal=51%	SHCBP1/BIRC5/PLK1/CDT1/KIF2C/CDC6/HJURP/ORC1/CDK1/CDC20/MCM10/RAD51AP1/CDC45/AURKB/NEK2/KIF20A/TTK/CDCA2/CDCA5/RAD51/BUB1/CCNF/DEPDC1B/RRM2/BUB1B/CENPA/ESCO2/CHEK1/CDCA3/CDC25A/EXO1/PBK/ORC6/CDCA8/RECQL4/DTL/E2F1/MYBL2/SLC25A10/GTSE1/POLQ/SPC24/NUF2/DEPDC1/SPAG5/UHRF1/CCNB2/CEP55/ANLN/UBE2C/CENPM/CLSPN/HMMR/HMGB3/TPX2/PLK4	covid
REACTOME_ANTIGEN_ACTIVATES_B_CELL_RECEPTOR_BCR_LEADING_TO_GENERATION_OF_SECOND_MESSENGERS	REACTOME_ANTIGEN_ACTIVATES_B_CELL_RECEPTOR_BCR_LEADING_TO_GENERATION_OF_SECOND_MESSENGERS	46	0.788574	3.44518	1e-10	3.71351e-09	2.86486e-09	360	tags=91%, list=17%, signal=78%	IGLV1-40/IGLV1-44/IGHV2-70/IGLV3-19/IGKV1D-33/IGHV4-34/IGLV3-25/IGKV2-28/IGHV3-30/IGLV3-21/IGLV2-23/IGLV3-27/IGHV4-39/IGKV1-33/IGKV3D-20/IGKV1-17/IGKV5-2/IGLV3-1/IGKV2D-40/IGHV4-59/IGHV1-69/IGLC2/IGKV2-30/IGLV1-47/IGLC3/IGHM/IGHV3-7/IGLV6-57/IGLV1-51/IGKV3-11/IGKV1-12/IGKV4-1/IGKV1-5/IGKV3-20/IGHV3-33/IGHV3-48/IGKV2D-30/IGLV2-11/IGKV3-15/IGLV2-14/IGKV1D-39/IGKV1-16	covid
REACTOME_ANTI_INFLAMMATORY_RESPONSE_FAVOURING_LEISHMANIA_PARASITE_INFECTION	REACTOME_ANTI_INFLAMMATORY_RESPONSE_FAVOURING_LEISHMANIA_PARASITE_INFECTION	65	0.707629	3.2961	1e-10	3.71351e-09	2.86486e-09	360	tags=71%, list=17%, signal=61%	IGHG4/IGLV1-40/IGLV1-44/IGHG1/IGHV2-70/IGLV3-19/IGKV1D-33/IGHG2/IGHV4-34/IGLV3-25/IGKV2-28/IGHV3-30/IGLV3-21/IGLV2-23/IGLV3-27/IGHV4-39/IGKV1-33/IGKV3D-20/IGKV1-17/IGKV5-2/IGLV3-1/IGKV2D-40/IGHV4-59/IGHV1-69/IGLC2/IGKV2-30/IGLV1-47/GNG8/IGLC3/IGHV3-7/IGLV6-57/IGLV1-51/IGKV3-11/IGKV1-12/IGKV4-1/IGKV1-5/IGKV3-20/IGHV3-33/IGHV3-48/IGKV2D-30/IGLV2-11/GPR84/IGKV3-15/IGLV2-14/IGKV1D-39/IGKV1-16	covid
REACTOME_BINDING_AND_UPTAKE_OF_LIGANDS_BY_SCAVENGER_RECEPTORS	REACTOME_BINDING_AND_UPTAKE_OF_LIGANDS_BY_SCAVENGER_RECEPTORS	51	0.778493	3.48308	1e-10	3.71351e-09	2.86486e-09	360	tags=88%, list=17%, signal=75%	IGLV1-40/IGLV1-44/IGHV2-70/IGLV3-19/IGKV1D-33/IGHV4-34/IGLV3-25/IGKV2-28/IGHV3-30/IGLV3-21/IGLV2-23/IGLV3-27/IGHV4-39/IGKV1-33/IGKV3D-20/IGKV1-17/HP/IGKV5-2/IGLV3-1/IGKV2D-40/IGHV4-59/IGHV1-69/IGLC2/IGHA2/IGKV2-30/IGLV1-47/IGLC3/IGHV3-7/IGLV6-57/IGHA1/IGLV1-51/IGKV3-11/IGKV1-12/IGKV4-1/IGKV1-5/JCHAIN/IGKV3-20/IGHV3-33/IGHV3-48/IGKV2D-30/IGLV2-11/IGKV3-15/IGLV2-14/IGKV1D-39/IGKV1-16	covid
REACTOME_CD22_MEDIATED_BCR_REGULATION	REACTOME_CD22_MEDIATED_BCR_REGULATION	46	0.788574	3.44518	1e-10	3.71351e-09	2.86486e-09	360	tags=91%, list=17%, signal=78%	IGLV1-40/IGLV1-44/IGHV2-70/IGLV3-19/IGKV1D-33/IGHV4-34/IGLV3-25/IGKV2-28/IGHV3-30/IGLV3-21/IGLV2-23/IGLV3-27/IGHV4-39/IGKV1-33/IGKV3D-20/IGKV1-17/IGKV5-2/IGLV3-1/IGKV2D-40/IGHV4-59/IGHV1-69/IGLC2/IGKV2-30/IGLV1-47/IGLC3/IGHM/IGHV3-7/IGLV6-57/IGLV1-51/IGKV3-11/IGKV1-12/IGKV4-1/IGKV1-5/IGKV3-20/IGHV3-33/IGHV3-48/IGKV2D-30/IGLV2-11/IGKV3-15/IGLV2-14/IGKV1D-39/IGKV1-16	covid
REACTOME_CELL_CYCLE	REACTOME_CELL_CYCLE	74	0.56318	2.68952	1e-10	3.71351e-09	2.86486e-09	562	tags=65%, list=26%, signal=50%	BIRC5/PLK1/CDT1/KIF2C/CDC6/HJURP/ORC1/CDK1/CDC20/GINS2/MCM10/CDC45/AURKB/NEK2/KIF20A/CDCA5/RAD51/BUB1/FOXM1/RRM2/BUB1B/CENPA/ESCO2/CHEK1/CDC25A/EXO1/ORC6/CDCA8/E2F1/PKMYT1/MYBL2/GTSE1/OIP5/SPC24/NUF2/GINS4/CCNE1/TK1/CCNB2/UBE2C/CENPM/ZWINT/CLSPN/HMMR/CDKN2B/CENPF/TPX2/PLK4	covid
REACTOME_CELL_CYCLE_MITOTIC	REACTOME_CELL_CYCLE_MITOTIC	63	0.573431	2.65679	1e-10	3.71351e-09	2.86486e-09	562	tags=67%, list=26%, signal=51%	BIRC5/PLK1/CDT1/KIF2C/CDC6/ORC1/CDK1/CDC20/GINS2/MCM10/CDC45/AURKB/NEK2/KIF20A/CDCA5/BUB1/FOXM1/RRM2/BUB1B/CENPA/ESCO2/CDC25A/ORC6/CDCA8/E2F1/PKMYT1/MYBL2/GTSE1/SPC24/NUF2/GINS4/CCNE1/TK1/CCNB2/UBE2C/CENPM/ZWINT/HMMR/CDKN2B/CENPF/TPX2/PLK4	covid
REACTOME_CELL_SURFACE_INTERACTIONS_AT_THE_VASCULAR_WALL	REACTOME_CELL_SURFACE_INTERACTIONS_AT_THE_VASCULAR_WALL	75	0.695334	3.33769	1e-10	3.71351e-09	2.86486e-09	400	tags=72%, list=19%, signal=61%	CD177/IGLV1-40/IGLV1-44/CEACAM6/FN1/IGHV2-70/CEACAM8/IGLV3-19/IGKV1D-33/IGHV4-34/OLR1/IGLV3-25/IGKV2-28/IGHV3-30/IGLV3-21/IGLV2-23/IGLV3-27/IGHV4-39/IGKV1-33/IGKV3D-20/IGKV1-17/IGKV5-2/IGLV3-1/IGKV2D-40/IGHV4-59/SDC1/IGHV1-69/IGLC2/IGHA2/IGKV2-30/IGLV1-47/IGLC3/IGHM/IGHV3-7/IGLV6-57/IGHA1/IGLV1-51/IGKV3-11/IGKV1-12/IGKV4-1/IGKV1-5/JCHAIN/IGKV3-20/IGHV3-33/IGHV3-48/IGKV2D-30/IGLV2-11/IGKV3-15/IGLV…	covid
REACTOME_COMPLEMENT_CASCADE	REACTOME_COMPLEMENT_CASCADE	57	0.744535	3.39524	1e-10	3.71351e-09	2.86486e-09	360	tags=81%, list=17%, signal=69%	IGHG4/IGLV1-40/IGLV1-44/C4BPA/IGHG1/IGHV2-70/IGLV3-19/IGKV1D-33/IGHG2/IGHV4-34/IGLV3-25/IGKV2-28/IGHV3-30/IGLV3-21/IGLV2-23/IGLV3-27/IGHV4-39/IGKV1-33/IGKV3D-20/IGKV1-17/IGKV5-2/IGLV3-1/IGKV2D-40/IGHV4-59/IGHV1-69/IGLC2/IGKV2-30/IGLV1-47/IGLC3/IGHV3-7/IGLV6-57/IGLV1-51/IGKV3-11/IGKV1-12/IGKV4-1/IGKV1-5/IGKV3-20/IGHV3-33/IGHV3-48/IGKV2D-30/IGLV2-11/IGKV3-15/IGLV2-14/C1QC/IGKV1D-39/IGKV1-16	covid
REACTOME_CREATION_OF_C4_AND_C2_ACTIVATORS	REACTOME_CREATION_OF_C4_AND_C2_ACTIVATORS	49	0.794978	3.52271	1e-10	3.71351e-09	2.86486e-09	360	tags=92%, list=17%, signal=78%	IGHG4/IGLV1-40/IGLV1-44/IGHG1/IGHV2-70/IGLV3-19/IGKV1D-33/IGHG2/IGHV4-34/IGLV3-25/IGKV2-28/IGHV3-30/IGLV3-21/IGLV2-23/IGLV3-27/IGHV4-39/IGKV1-33/IGKV3D-20/IGKV1-17/IGKV5-2/IGLV3-1/IGKV2D-40/IGHV4-59/IGHV1-69/IGLC2/IGKV2-30/IGLV1-47/IGLC3/IGHV3-7/IGLV6-57/IGLV1-51/IGKV3-11/IGKV1-12/IGKV4-1/IGKV1-5/IGKV3-20/IGHV3-33/IGHV3-48/IGKV2D-30/IGLV2-11/IGKV3-15/IGLV2-14/C1QC/IGKV1D-39/IGKV1-16	covid
REACTOME_FCERI_MEDIATED_CA_2_MOBILIZATION	REACTOME_FCERI_MEDIATED_CA_2_MOBILIZATION	49	0.757568	3.35694	1e-10	3.71351e-09	2.86486e-09	360	tags=84%, list=17%, signal=71%	IGLV1-40/IGLV1-44/IGHV2-70/IGLV3-19/IGKV1D-33/IGHV4-34/IGLV3-25/IGKV2-28/IGHV3-30/IGLV3-21/IGLV2-23/IGLV3-27/IGHV4-39/IGKV1-33/IGKV3D-20/IGKV1-17/IGKV5-2/IGLV3-1/IGKV2D-40/IGHV4-59/IGHV1-69/IGLC2/IGKV2-30/IGLV1-47/IGLC3/IGHV3-7/IGLV6-57/IGLV1-51/IGKV3-11/IGKV1-12/IGKV4-1/IGKV1-5/IGKV3-20/IGHV3-33/IGHV3-48/IGKV2D-30/IGLV2-11/IGKV3-15/IGLV2-14/IGKV1D-39/IGKV1-16	covid
REACTOME_FCERI_MEDIATED_MAPK_ACTIVATION	REACTOME_FCERI_MEDIATED_MAPK_ACTIVATION	47	0.76977	3.38887	1e-10	3.71351e-09	2.86486e-09	360	tags=87%, list=17%, signal=74%	IGLV1-40/IGLV1-44/IGHV2-70/IGLV3-19/IGKV1D-33/IGHV4-34/IGLV3-25/IGKV2-28/IGHV3-30/IGLV3-21/IGLV2-23/IGLV3-27/IGHV4-39/IGKV1-33/IGKV3D-20/IGKV1-17/IGKV5-2/IGLV3-1/IGKV2D-40/IGHV4-59/IGHV1-69/IGLC2/IGKV2-30/IGLV1-47/IGLC3/IGHV3-7/IGLV6-57/IGLV1-51/IGKV3-11/IGKV1-12/IGKV4-1/IGKV1-5/IGKV3-20/IGHV3-33/IGHV3-48/IGKV2D-30/IGLV2-11/IGKV3-15/IGLV2-14/IGKV1D-39/IGKV1-16	covid
REACTOME_FCERI_MEDIATED_NF_KB_ACTIVATION	REACTOME_FCERI_MEDIATED_NF_KB_ACTIVATION	49	0.758103	3.35931	1e-10	3.71351e-09	2.86486e-09	360	tags=84%, list=17%, signal=71%	IGLV1-40/IGLV1-44/IGHV2-70/IGLV3-19/IGKV1D-33/IGHV4-34/IGLV3-25/IGKV2-28/IGHV3-30/IGLV3-21/IGLV2-23/IGLV3-27/IGHV4-39/IGKV1-33/IGKV3D-20/IGKV1-17/IGKV5-2/IGLV3-1/IGKV2D-40/IGHV4-59/IGHV1-69/IGLC2/IGKV2-30/IGLV1-47/IGLC3/IGHV3-7/IGLV6-57/IGLV1-51/IGKV3-11/IGKV1-12/IGKV4-1/IGKV1-5/IGKV3-20/IGHV3-33/IGHV3-48/IGKV2D-30/IGLV2-11/IGKV3-15/IGLV2-14/IGKV1D-39/IGKV1-16	covid
REACTOME_FCGAMMA_RECEPTOR_FCGR_DEPENDENT_PHAGOCYTOSIS	REACTOME_FCGAMMA_RECEPTOR_FCGR_DEPENDENT_PHAGOCYTOSIS	56	0.751377	3.41043	1e-10	3.71351e-09	2.86486e-09	360	tags=80%, list=17%, signal=69%	IGHG4/IGLV1-40/IGLV1-44/IGHG1/IGHV2-70/IGLV3-19/IGKV1D-33/IGHG2/IGHV4-34/IGLV3-25/IGKV2-28/IGHV3-30/IGLV3-21/IGLV2-23/IGLV3-27/IGHV4-39/IGKV1-33/IGKV3D-20/IGKV1-17/IGKV5-2/IGLV3-1/IGKV2D-40/IGHV4-59/IGHV1-69/IGLC2/IGKV2-30/IGLV1-47/IGLC3/IGHV3-7/IGLV6-57/IGLV1-51/IGKV3-11/IGKV1-12/IGKV4-1/IGKV1-5/IGKV3-20/IGHV3-33/IGHV3-48/IGKV2D-30/WASF1/IGLV2-11/IGKV3-15/IGLV2-14/IGKV1D-39/IGKV1-16	covid
REACTOME_FCGR3A_MEDIATED_IL10_SYNTHESIS	REACTOME_FCGR3A_MEDIATED_IL10_SYNTHESIS	53	0.760635	3.42482	1e-10	3.71351e-09	2.86486e-09	360	tags=83%, list=17%, signal=71%	IGHG4/IGLV1-40/IGLV1-44/IGHG1/IGHV2-70/IGLV3-19/IGKV1D-33/IGHG2/IGHV4-34/IGLV3-25/IGKV2-28/IGHV3-30/IGLV3-21/IGLV2-23/IGLV3-27/IGHV4-39/IGKV1-33/IGKV3D-20/IGKV1-17/IGKV5-2/IGLV3-1/IGKV2D-40/IGHV4-59/IGHV1-69/IGLC2/IGKV2-30/IGLV1-47/IGLC3/IGHV3-7/IGLV6-57/IGLV1-51/IGKV3-11/IGKV1-12/IGKV4-1/IGKV1-5/IGKV3-20/IGHV3-33/IGHV3-48/IGKV2D-30/IGLV2-11/IGKV3-15/IGLV2-14/IGKV1D-39/IGKV1-16	covid
REACTOME_FCGR_ACTIVATION	REACTOME_FCGR_ACTIVATION	50	0.779852	3.47448	1e-10	3.71351e-09	2.86486e-09	360	tags=88%, list=17%, signal=75%	IGHG4/IGLV1-40/IGLV1-44/IGHG1/IGHV2-70/IGLV3-19/IGKV1D-33/IGHG2/IGHV4-34/IGLV3-25/IGKV2-28/IGHV3-30/IGLV3-21/IGLV2-23/IGLV3-27/IGHV4-39/IGKV1-33/IGKV3D-20/IGKV1-17/IGKV5-2/IGLV3-1/IGKV2D-40/IGHV4-59/IGHV1-69/IGLC2/IGKV2-30/IGLV1-47/IGLC3/IGHV3-7/IGLV6-57/IGLV1-51/IGKV3-11/IGKV1-12/IGKV4-1/IGKV1-5/IGKV3-20/IGHV3-33/IGHV3-48/IGKV2D-30/IGLV2-11/IGKV3-15/IGLV2-14/IGKV1D-39/IGKV1-16	covid
REACTOME_FC_EPSILON_RECEPTOR_FCERI_SIGNALING	REACTOME_FC_EPSILON_RECEPTOR_FCERI_SIGNALING	53	0.734844	3.30869	1e-10	3.71351e-09	2.86486e-09	360	tags=77%, list=17%, signal=66%	IGLV1-40/IGLV1-44/IGHV2-70/IGLV3-19/IGKV1D-33/IGHV4-34/IGLV3-25/IGKV2-28/IGHV3-30/IGLV3-21/IGLV2-23/IGLV3-27/IGHV4-39/IGKV1-33/IGKV3D-20/IGKV1-17/IGKV5-2/IGLV3-1/IGKV2D-40/IGHV4-59/IGHV1-69/IGLC2/IGKV2-30/IGLV1-47/IGLC3/IGHV3-7/IGLV6-57/IGLV1-51/IGKV3-11/IGKV1-12/IGKV4-1/IGKV1-5/IGKV3-20/IGHV3-33/IGHV3-48/IGKV2D-30/IGLV2-11/IGKV3-15/IGLV2-14/IGKV1D-39/IGKV1-16	covid
REACTOME_HEMOSTASIS	REACTOME_HEMOSTASIS	136	0.50894	2.64279	1e-10	3.71351e-09	2.86486e-09	400	tags=46%, list=19%, signal=40%	CD177/IGLV1-40/IGLV1-44/CEACAM6/FN1/IGHV2-70/CEACAM8/IGLV3-19/IGKV1D-33/IGHV4-34/OLR1/IGLV3-25/IGKV2-28/IGHV3-30/IGLV3-21/IGLV2-23/IGLV3-27/KIF2C/VWF/IGHV4-39/IGKV1-33/IGKV3D-20/IGKV1-17/IGKV5-2/IGLV3-1/IGKV2D-40/IGHV4-59/SDC1/IGHV1-69/IGLC2/IGHA2/IGKV2-30/IGLV1-47/GNG8/IGLC3/KIF20A/IGHM/IGHV3-7/IGLV6-57/IGHA1/ORM1/PLAU/IGLV1-51/IGKV3-11/IGKV1-12/IGKV4-1/IGKV1-5/JCHAIN/ITPK1/IGKV3-20/IGHV3-33/IGH…	covid
REACTOME_IMMUNOREGULATORY_INTERACTIONS_BETWEEN_A_LYMPHOID_AND_A_NON_LYMPHOID_CELL	REACTOME_IMMUNOREGULATORY_INTERACTIONS_BETWEEN_A_LYMPHOID_AND_A_NON_LYMPHOID_CELL	71	0.609917	2.89652	1e-10	3.71351e-09	2.86486e-09	360	tags=59%, list=17%, signal=51%	IGLV1-40/IGLV1-44/IGHV2-70/IGLV3-19/IGKV1D-33/IGHV4-34/IGLV3-25/IGKV2-28/IGHV3-30/IGLV3-21/IGLV2-23/IGLV3-27/IGHV4-39/IGKV1-33/IGKV3D-20/COL17A1/IGKV1-17/IGKV5-2/IGLV3-1/IGKV2D-40/IGHV4-59/IGHV1-69/IGLC2/IGKV2-30/IGLV1-47/IGLC3/IGHV3-7/IGLV6-57/IGLV1-51/IGKV3-11/IGKV1-12/IGKV4-1/IGKV1-5/IGKV3-20/IGHV3-33/IGHV3-48/IGKV2D-30/IGLV2-11/IGKV3-15/IGLV2-14/IGKV1D-39/IGKV1-16	covid
REACTOME_INFECTIOUS_DISEASE	REACTOME_INFECTIOUS_DISEASE	98	0.586403	2.92571	1e-10	3.71351e-09	2.86486e-09	360	tags=50%, list=17%, signal=44%	IGHG4/IGLV1-40/CTSG/IGLV1-44/IGHG1/IGHV2-70/IGLV3-19/IGKV1D-33/IGHG2/IGHV4-34/IGLV3-25/IGKV2-28/LTF/IGHV3-30/IGLV3-21/IGLV2-23/IGLV3-27/IGHV4-39/IGKV1-33/IGKV3D-20/IGKV1-17/IGKV5-2/IGLV3-1/IGKV2D-40/IGHV4-59/IGHV1-69/IGLC2/IGKV2-30/IGLV1-47/GNG8/IGLC3/IGHV3-7/IGLV6-57/IGLV1-51/IGKV3-11/IGKV1-12/IGKV4-1/IGKV1-5/IGKV3-20/IGHV3-33/IGHV3-48/IGKV2D-30/WASF1/IGLV2-11/GPR84/IGKV3-15/IGLV2-14/IGKV1D-39/I…	covid
REACTOME_INITIAL_TRIGGERING_OF_COMPLEMENT	REACTOME_INITIAL_TRIGGERING_OF_COMPLEMENT	50	0.787396	3.50809	1e-10	3.71351e-09	2.86486e-09	360	tags=90%, list=17%, signal=77%	IGHG4/IGLV1-40/IGLV1-44/IGHG1/IGHV2-70/IGLV3-19/IGKV1D-33/IGHG2/IGHV4-34/IGLV3-25/IGKV2-28/IGHV3-30/IGLV3-21/IGLV2-23/IGLV3-27/IGHV4-39/IGKV1-33/IGKV3D-20/IGKV1-17/IGKV5-2/IGLV3-1/IGKV2D-40/IGHV4-59/IGHV1-69/IGLC2/IGKV2-30/IGLV1-47/IGLC3/IGHV3-7/IGLV6-57/IGLV1-51/IGKV3-11/IGKV1-12/IGKV4-1/IGKV1-5/IGKV3-20/IGHV3-33/IGHV3-48/IGKV2D-30/IGLV2-11/IGKV3-15/IGLV2-14/C1QC/IGKV1D-39/IGKV1-16	covid
REACTOME_INNATE_IMMUNE_SYSTEM	REACTOME_INNATE_IMMUNE_SYSTEM	183	0.550209	2.91038	1e-10	3.71351e-09	2.86486e-09	360	tags=45%, list=17%, signal=41%	OLFM4/DEFA1/CD177/MMP8/DEFA1B/IGHG4/IGLV1-40/CTSG/ABCA13/IGLV1-44/C4BPA/IGHG1/CEACAM6/DEFA3/CHIT1/IGHV2-70/CEACAM8/IGLV3-19/DEFA4/IGKV1D-33/MPO/IGHG2/IGHV4-34/OLR1/IGLV3-25/IGKV2-28/LTF/IGHV3-30/LCN2/SLC2A5/CRISP3/ARG1/IGLV3-21/BPI/IGLV2-23/IGLV3-27/IGHV4-39/IGKV1-33/IGKV3D-20/RNASE3/IGKV1-17/HP/IGKV5-2/IGLV3-1/IGKV2D-40/IGHV4-59/IGHV1-69/IGLC2/IGKV2-30/IGLV1-47/MMP9/PGLYRP1/IGLC3/IGHV3-7/IGLV6-5…	covid
REACTOME_LEISHMANIA_INFECTION	REACTOME_LEISHMANIA_INFECTION	71	0.691304	3.28303	1e-10	3.71351e-09	2.86486e-09	360	tags=68%, list=17%, signal=58%	IGHG4/IGLV1-40/CTSG/IGLV1-44/IGHG1/IGHV2-70/IGLV3-19/IGKV1D-33/IGHG2/IGHV4-34/IGLV3-25/IGKV2-28/IGHV3-30/IGLV3-21/IGLV2-23/IGLV3-27/IGHV4-39/IGKV1-33/IGKV3D-20/IGKV1-17/IGKV5-2/IGLV3-1/IGKV2D-40/IGHV4-59/IGHV1-69/IGLC2/IGKV2-30/IGLV1-47/GNG8/IGLC3/IGHV3-7/IGLV6-57/IGLV1-51/IGKV3-11/IGKV1-12/IGKV4-1/IGKV1-5/IGKV3-20/IGHV3-33/IGHV3-48/IGKV2D-30/WASF1/IGLV2-11/GPR84/IGKV3-15/IGLV2-14/IGKV1D-39/IGKV1…	covid
REACTOME_PARASITE_INFECTION	REACTOME_PARASITE_INFECTION	52	0.774569	3.47751	1e-10	3.71351e-09	2.86486e-09	360	tags=87%, list=17%, signal=74%	IGHG4/IGLV1-40/IGLV1-44/IGHG1/IGHV2-70/IGLV3-19/IGKV1D-33/IGHG2/IGHV4-34/IGLV3-25/IGKV2-28/IGHV3-30/IGLV3-21/IGLV2-23/IGLV3-27/IGHV4-39/IGKV1-33/IGKV3D-20/IGKV1-17/IGKV5-2/IGLV3-1/IGKV2D-40/IGHV4-59/IGHV1-69/IGLC2/IGKV2-30/IGLV1-47/IGLC3/IGHV3-7/IGLV6-57/IGLV1-51/IGKV3-11/IGKV1-12/IGKV4-1/IGKV1-5/IGKV3-20/IGHV3-33/IGHV3-48/IGKV2D-30/WASF1/IGLV2-11/IGKV3-15/IGLV2-14/IGKV1D-39/IGKV1-16	covid
REACTOME_ROLE_OF_LAT2_NTAL_LAB_ON_CALCIUM_MOBILIZATION	REACTOME_ROLE_OF_LAT2_NTAL_LAB_ON_CALCIUM_MOBILIZATION	47	0.769947	3.38965	1e-10	3.71351e-09	2.86486e-09	360	tags=87%, list=17%, signal=74%	IGLV1-40/IGLV1-44/IGHV2-70/IGLV3-19/IGKV1D-33/IGHV4-34/IGLV3-25/IGKV2-28/IGHV3-30/IGLV3-21/IGLV2-23/IGLV3-27/IGHV4-39/IGKV1-33/IGKV3D-20/IGKV1-17/IGKV5-2/IGLV3-1/IGKV2D-40/IGHV4-59/IGHV1-69/IGLC2/IGKV2-30/IGLV1-47/IGLC3/IGHV3-7/IGLV6-57/IGLV1-51/IGKV3-11/IGKV1-12/IGKV4-1/IGKV1-5/IGKV3-20/IGHV3-33/IGHV3-48/IGKV2D-30/IGLV2-11/IGKV3-15/IGLV2-14/IGKV1D-39/IGKV1-16	covid
REACTOME_ROLE_OF_PHOSPHOLIPIDS_IN_PHAGOCYTOSIS	REACTOME_ROLE_OF_PHOSPHOLIPIDS_IN_PHAGOCYTOSIS	54	0.755991	3.41539	1e-10	3.71351e-09	2.86486e-09	360	tags=81%, list=17%, signal=70%	IGHG4/IGLV1-40/IGLV1-44/IGHG1/IGHV2-70/IGLV3-19/IGKV1D-33/IGHG2/IGHV4-34/IGLV3-25/IGKV2-28/IGHV3-30/IGLV3-21/IGLV2-23/IGLV3-27/IGHV4-39/IGKV1-33/IGKV3D-20/IGKV1-17/IGKV5-2/IGLV3-1/IGKV2D-40/IGHV4-59/IGHV1-69/IGLC2/IGKV2-30/IGLV1-47/IGLC3/IGHV3-7/IGLV6-57/IGLV1-51/IGKV3-11/IGKV1-12/IGKV4-1/IGKV1-5/IGKV3-20/IGHV3-33/IGHV3-48/IGKV2D-30/IGLV2-11/IGKV3-15/IGLV2-14/IGKV1D-39/IGKV1-16	covid
REACTOME_SCAVENGING_OF_HEME_FROM_PLASMA	REACTOME_SCAVENGING_OF_HEME_FROM_PLASMA	49	0.793341	3.51545	1e-10	3.71351e-09	2.86486e-09	360	tags=92%, list=17%, signal=78%	IGLV1-40/IGLV1-44/IGHV2-70/IGLV3-19/IGKV1D-33/IGHV4-34/IGLV3-25/IGKV2-28/IGHV3-30/IGLV3-21/IGLV2-23/IGLV3-27/IGHV4-39/IGKV1-33/IGKV3D-20/IGKV1-17/HP/IGKV5-2/IGLV3-1/IGKV2D-40/IGHV4-59/IGHV1-69/IGLC2/IGHA2/IGKV2-30/IGLV1-47/IGLC3/IGHV3-7/IGLV6-57/IGHA1/IGLV1-51/IGKV3-11/IGKV1-12/IGKV4-1/IGKV1-5/JCHAIN/IGKV3-20/IGHV3-33/IGHV3-48/IGKV2D-30/IGLV2-11/IGKV3-15/IGLV2-14/IGKV1D-39/IGKV1-16	covid
REACTOME_SIGNALING_BY_THE_B_CELL_RECEPTOR_BCR	REACTOME_SIGNALING_BY_THE_B_CELL_RECEPTOR_BCR	49	0.770658	3.41494	1e-10	3.71351e-09	2.86486e-09	360	tags=86%, list=17%, signal=73%	IGLV1-40/IGLV1-44/IGHV2-70/IGLV3-19/IGKV1D-33/IGHV4-34/IGLV3-25/IGKV2-28/IGHV3-30/IGLV3-21/IGLV2-23/IGLV3-27/IGHV4-39/IGKV1-33/IGKV3D-20/IGKV1-17/IGKV5-2/IGLV3-1/IGKV2D-40/IGHV4-59/IGHV1-69/IGLC2/IGKV2-30/IGLV1-47/IGLC3/IGHM/IGHV3-7/IGLV6-57/IGLV1-51/IGKV3-11/IGKV1-12/IGKV4-1/IGKV1-5/IGKV3-20/IGHV3-33/IGHV3-48/IGKV2D-30/IGLV2-11/IGKV3-15/IGLV2-14/IGKV1D-39/IGKV1-16	covid
REACTOME_VESICLE_MEDIATED_TRANSPORT	REACTOME_VESICLE_MEDIATED_TRANSPORT	98	0.566163	2.82472	1e-10	3.71351e-09	2.86486e-09	518	tags=59%, list=24%, signal=47%	IGLV1-40/IGLV1-44/IGHV2-70/IGLV3-19/IGKV1D-33/IGHV4-34/IGLV3-25/IGKV2-28/IGHV3-30/IGLV3-21/IGLV2-23/IGLV3-27/KIF2C/IGHV4-39/IGKV1-33/IGKV3D-20/IGKV1-17/HP/IGKV5-2/IGLV3-1/IGKV2D-40/IGHV4-59/IGHV1-69/IGLC2/IGHA2/IGKV2-30/IGLV1-47/DENND5B/IGLC3/KIF20A/IGHV3-7/IGLV6-57/IGHA1/IGLV1-51/IGKV3-11/IGKV1-12/IGKV4-1/IGKV1-5/JCHAIN/IGKV3-20/IGHV3-33/IGHV3-48/IGKV2D-30/IGLV2-11/TXNDC5/IGKV3-15/IGLV2-14/IGKV1…	covid
ROSTY_CERVICAL_CANCER_PROLIFERATION_CLUSTER	ROSTY_CERVICAL_CANCER_PROLIFERATION_CLUSTER	67	0.557116	2.62094	1e-10	3.71351e-09	2.86486e-09	796	tags=82%, list=37%, signal=53%	SHCBP1/BIRC5/PLK1/KIF2C/CDC6/HJURP/CDK1/CDC20/MCM10/RAD51AP1/AURKB/NEK2/TRIP13/KIF20A/TTK/GGH/E2F8/BUB1/CCNF/FOXM1/RRM2/BUB1B/CENPA/CHEK1/CDCA3/PBK/CDCA8/DTL/E2F1/MYBL2/GTSE1/OIP5/POLQ/SPAG5/GINS4/TK1/CCNB2/CEP55/UBE2C/CENPM/ZWINT/HMMR/CENPF/TPX2/NCAPH/MKI67/DLGAP5/HMGB2/MELK/TOP2A/TYMS/NCAPG/CCNB1/CCNA2/CA2	covid
SHEDDEN_LUNG_CANCER_POOR_SURVIVAL_A6	SHEDDEN_LUNG_CANCER_POOR_SURVIVAL_A6	86	0.548606	2.69502	1e-10	3.71351e-09	2.86486e-09	789	tags=80%, list=37%, signal=53%	SHCBP1/BIRC5/CDT1/KIF2C/CDC6/HJURP/ORC1/CDK1/CDC20/GINS2/MCM10/RAD51AP1/CDC45/AURKB/NEK2/TRIP13/KIF20A/TTK/GGH/E2F8/BUB1/FOXM1/RRM2/BUB1B/CENPA/PLOD2/CHEK1/CDCA3/CDC25A/EXO1/WASF1/PBK/CDCA8/RECQL4/DTL/MYBL2/SLC25A10/GTSE1/OIP5/DEPDC1/SPAG5/GINS4/CCNE1/TK1/CCNB2/CEP55/UBE2C/CENPM/ZWINT/HMMR/CENPF/SLC2A1/SCD/TPX2/PLK4/NCAPH/MKI67/DLGAP5/IL18RAP/SLC7A5/TROAP/PYGL/HMGB2/MELK/TOP2A/TYMS/NCAPG/CCNB1/CC…	covid
DUTERTRE_ESTRADIOL_RESPONSE_24HR_UP	DUTERTRE_ESTRADIOL_RESPONSE_24HR_UP	80	0.53076	2.56941	2.35787e-10	8.52558e-09	6.57723e-09	765	tags=76%, list=35%, signal=51%	SHCBP1/BIRC5/PLK1/CDT1/KIF2C/CDC6/CDK1/GINS2/MCM10/CDC45/AURKB/TRIP13/TTK/GGH/FAM111B/CDCA2/CDCA5/E2F8/RAD51/BUB1/FOXM1/DEPDC1B/RRM2/BUB1B/ESCO2/CHEK1/EXO1/PBK/RECQL4/DTL/E2F1/PKMYT1/MYBL2/GTSE1/POLQ/SPC24/SPAG5/UHRF1/TK1/CCNB2/CEP55/ANLN/UBE2C/CENPM/ZWINT/CLSPN/SLC2A1/TPX2/PLK4/NCAPH/FKBP5/MKI67/DLGAP5/SIAH2/SLC7A5/TROAP/MELK/TOP2A/UBE2T/TYMS/NCAPG	covid
FISCHER_G2_M_CELL_CYCLE	FISCHER_G2_M_CELL_CYCLE	60	0.579091	2.6637	2.45975e-10	8.6659e-09	6.68548e-09	562	tags=70%, list=26%, signal=53%	SHCBP1/BIRC5/PLK1/KIF2C/HJURP/CDK1/CDC20/AURKB/NEK2/TRIP13/SAPCD2/SMTN/KIF20A/TTK/CDCA2/PLAU/BUB1/CCNF/FOXM1/DEPDC1B/BUB1B/CENPA/CDCA3/PBK/CDCA8/ANXA3/GTSE1/OIP5/POLQ/NUF2/DEPDC1/SPAG5/CCNB2/CEP55/ANLN/UBE2C/HMMR/HMGB3/LAMC1/CENPF/TPX2/PLK4	covid
REACTOME_ADAPTIVE_IMMUNE_SYSTEM	REACTOME_ADAPTIVE_IMMUNE_SYSTEM	118	0.474438	2.4243	2.87178e-10	9.86455e-09	7.6102e-09	360	tags=41%, list=17%, signal=36%	IGLV1-40/IGLV1-44/IGHV2-70/IGLV3-19/IGKV1D-33/IGHV4-34/IGLV3-25/IGKV2-28/IGHV3-30/IGLV3-21/RAP1GAP/IGLV2-23/IGLV3-27/KIF2C/IGHV4-39/IGKV1-33/IGKV3D-20/COL17A1/IGKV1-17/CDC20/IGKV5-2/IGLV3-1/IGKV2D-40/IGHV4-59/IGHV1-69/IGLC2/IGKV2-30/IGLV1-47/IGLC3/KIF20A/IGHM/IGHV3-7/IGLV6-57/IGLV1-51/IGKV3-11/CCNF/IGKV1-12/IGKV4-1/IGKV1-5/IGKV3-20/IGHV3-33/IGHV3-48/IGKV2D-30/IGLV2-11/IGKV3-15/IGLV2-14/IGKV1D-39/…	covid
REACTOME_CELL_CYCLE_CHECKPOINTS	REACTOME_CELL_CYCLE_CHECKPOINTS	36	0.660727	2.71596	3.29203e-10	1.10323e-08	8.51111e-09	548	tags=81%, list=25%, signal=61%	BIRC5/PLK1/KIF2C/CDC6/ORC1/CDK1/CDC20/MCM10/CDC45/AURKB/BUB1/BUB1B/CENPA/CHEK1/CDC25A/EXO1/ORC6/CDCA8/PKMYT1/GTSE1/SPC24/NUF2/CCNE1/CCNB2/UBE2C/CENPM/ZWINT/CLSPN/CENPF	covid
SMID_BREAST_CANCER_BASAL_UP	SMID_BREAST_CANCER_BASAL_UP	107	0.49284	2.49066	3.67506e-10	1.20227e-08	9.27514e-09	508	tags=54%, list=24%, signal=44%	IGHG1/IGHV4-34/IGKV1D-17/SHCBP1/BIRC5/LCN2/CDT1/GLDC/IL1R2/SPP1/ORC1/CDK1/CDC20/MCM10/RAD51AP1/CDC45/IGHV1-69/IGLC2/PCOLCE2/NEK2/TMCC2/TRIP13/TTK/IGHV3-7/GGH/IGLV3-10/GALNT14/BUB1/FOXM1/IGHV4-61/VNN1/CENPA/PLOD2/SCRG1/CHEK1/IGHV3-33/CDCA3/CDC25A/UCHL1/EXO1/PTX3/IGKV1D-13/PBK/CDCA8/IGLV2-14/IGKV1D-39/ANXA3/MYBL2/IGHV3-23/GTSE1/COCH/RAB6B/SLPI/CCNE1/CCNB2/CEP55/PHGDH/CALD1	covid
BENPORATH_CYCLING_GENES	BENPORATH_CYCLING_GENES	99	0.490857	2.45895	1.19696e-09	3.82472e-08	2.95066e-08	574	tags=58%, list=27%, signal=44%	OLR1/SHCBP1/BIRC5/PLK1/KIF2C/CDC6/HJURP/ORC1/CDC20/GINS2/RAD51AP1/CDC45/SDC1/AURKB/NEK2/TRIP13/SMTN/TTK/E2F8/RAD51/CD24/BUB1/CCNF/FOXM1/DEPDC1B/RRM2/BUB1B/CENPA/CDCA3/CDC25A/EXO1/PBK/CDCA8/RECQL4/DTL/E2F1/PKMYT1/GTSE1/POLQ/NUF2/SPAG5/CCNE1/UHRF1/CCNB2/CEP55/ANLN/UBE2C/CENPM/ZWINT/CLSPN/HMMR/HMGB3/CENPF/MITF/TPX2/ITGB3/GADD45A	covid
VECCHI_GASTRIC_CANCER_EARLY_UP	VECCHI_GASTRIC_CANCER_EARLY_UP	74	0.525772	2.51088	1.72716e-09	5.39344e-08	4.16088e-08	559	tags=62%, list=26%, signal=48%	BIRC5/LCN2/SPP1/CDC6/CDK1/CDC20/GINS2/MCM10/RAD51AP1/NEK2/TRIP13/KIF20A/TTK/GGH/CDCA2/CDCA5/TACSTD2/E2F8/BUB1/FOXM1/DEPDC1B/RRM2/BUB1B/CENPA/ESCO2/CHEK1/PBK/DTL/MYBL2/GTSE1/NUF2/DEPDC1/GINS4/CCNE1/UHRF1/TK1/CCNB2/CEP55/ANLN/UBE2C/CENPM/ZWINT/HMMR/HMGB3/CENPF/TPX2	covid
KINSEY_TARGETS_OF_EWSR1_FLII_FUSION_UP	KINSEY_TARGETS_OF_EWSR1_FLII_FUSION_UP	119	0.462949	2.36924	1.80987e-09	5.52614e-08	4.26325e-08	777	tags=67%, list=36%, signal=46%	BIRC5/PLK1/RAP1GAP/CDT1/GRB10/KIF2C/CDC6/HJURP/ORC1/CDK1/CDC20/DAAM2/GINS2/MCM10/RAD51AP1/CDC45/AURKB/NEK2/TRIP13/TTK/CDCA2/CDCA5/E2F8/RAD51/BUB1/CCNF/FOXM1/DEPDC1B/RRM2/ITPK1/BUB1B/SLC1A3/CENPA/CHEK1/CDCA3/CDC25A/EXO1/SLCO4A1/ORC6/CDCA8/DTL/E2F1/PKMYT1/MYBL2/GTSE1/LOXHD1/OIP5/POLQ/NUF2/DEPDC1/MAB21L3/GINS4/UHRF1/TK1/CCNB2/CEP55/ANLN/CENPM/ZWINT/HMMR/HMGB3/CENPF/TPX2/PLK4/SLC24A3/NCAPH/DYRK3/MKI6…	covid
SOTIRIOU_BREAST_CANCER_GRADE_1_VS_3_UP	SOTIRIOU_BREAST_CANCER_GRADE_1_VS_3_UP	62	0.551665	2.55794	2.30856e-09	6.89557e-08	5.31972e-08	789	tags=81%, list=37%, signal=53%	BIRC5/PLK1/KIF2C/HJURP/CDK1/CDC20/MCM10/CDC45/AURKB/NEK2/TRIP13/KIF20A/TTK/E2F8/RAD51/BUB1/FOXM1/RRM2/BUB1B/CENPA/CHEK1/CDCA3/CDC25A/EXO1/CDCA8/E2F1/PKMYT1/MYBL2/GTSE1/OIP5/POLQ/SPAG5/CCNB2/CEP55/UBE2C/ZWINT/HMMR/HMGB3/CENPF/TPX2/NCAPH/MKI67/DLGAP5/SLC7A5/TROAP/MELK/TOP2A/NCAPG/CCNB1/CCNA2	covid
MATTIOLI_MGUS_VS_PCL	MATTIOLI_MGUS_VS_PCL	30	0.667773	2.63989	4.05997e-09	1.18689e-07	9.15652e-08	400	tags=67%, list=19%, signal=55%	DEFA1/IGHG1/IGLV3-19/IGHV4-34/IGLV3-25/IGKV1D-17/IGHV3-20/RNASE3/IGHV1-69/IGLC2/IGHV3-7/IGLV3-10/IGKV4-1/IGHV4-61/IGHV3-33/IGKV1D-13/IGLV2-14/IGKV1D-39/IGLV4-60/IGHV3-23	covid
BASAKI_YBX1_TARGETS_UP	BASAKI_YBX1_TARGETS_UP	67	0.519992	2.44629	9.83009e-09	2.81386e-07	2.17081e-07	502	tags=58%, list=23%, signal=46%	SHCBP1/BIRC5/PLK1/KIF2C/CDC6/HJURP/CDK1/CDC20/GINS2/MCM10/AURKB/NEK2/TRIP13/KIF20A/RAD51/BUB1/DEPDC1B/BUB1B/CENPA/CHEK1/CDCA3/PBK/ORC6/CDCA8/ANXA3/DTL/GTSE1/OIP5/SPC24/NUF2/DEPDC1/UHRF1/TK1/CCNB2/CEP55/ANLN/UBE2C/CENPM/ZWINT	covid
MEBARKI_HCC_PROGENITOR_FZD8CRD_UP	MEBARKI_HCC_PROGENITOR_FZD8CRD_UP	105	0.466208	2.34701	1.20534e-08	3.37988e-07	2.60748e-07	802	tags=70%, list=37%, signal=46%	SHCBP1/BIRC5/PLK1/KIF2C/FHDC1/CDC6/HJURP/ORC1/CDK1/CDC20/GINS2/MCM10/CDC45/AURKB/NEK2/TRIP13/SMTN/KIF20A/TTK/FAM111B/CDCA5/E2F8/RAD51/BUB1/CCNF/FOXM1/DEPDC1B/RRM2/BUB1B/CENPA/ESCO2/CHEK1/CDCA3/CDC25A/EXO1/PBK/ORC6/CDCA8/ANXA3/E2F1/PKMYT1/MYBL2/GTSE1/OIP5/POLQ/SPC24/NUF2/UHRF1/TK1/CEP55/ANLN/CENPM/ZWINT/HMMR/TPX2/PLK4/KIF24/MKI67/DLGAP5/SPTB/PANX2/SLC7A5/TROAP/HMGB2/MELK/TOP2A/UBE2T/CENPW/TYMS/NCA…	covid
GAVIN_FOXP3_TARGETS_CLUSTER_P6	GAVIN_FOXP3_TARGETS_CLUSTER_P6	36	0.627472	2.57926	1.68449e-08	4.62899e-07	3.57113e-07	559	tags=78%, list=26%, signal=59%	BIRC5/PLK1/KIF2C/CDK1/CDC20/GINS2/MCM10/AURKB/NEK2/KIF20A/CDCA5/RAD51/BUB1/RRM2/BUB1B/CDCA3/PBK/CDCA8/SPC24/NUF2/SPAG5/TK1/CCNB2/CEP55/CLSPN/HMMR/CENPF/TPX2	covid
WHITFIELD_CELL_CYCLE_G2_M	WHITFIELD_CELL_CYCLE_G2_M	40	0.607242	2.56009	2.11469e-08	5.69724e-07	4.39525e-07	639	tags=78%, list=30%, signal=56%	OLR1/SHCBP1/BIRC5/PLK1/KIF2C/NEK2/TRIP13/SAPCD2/SMTN/TTK/BUB1/FOXM1/DEPDC1B/BUB1B/CENPA/CDCA3/PBK/GTSE1/NUF2/DEPDC1/SPAG5/CCNB2/CEP55/ANLN/HMMR/HMGB3/CENPF/TPX2/GADD45A/MKI67/DLGAP5	covid
NUYTTEN_EZH2_TARGETS_DN	NUYTTEN_EZH2_TARGETS_DN	117	0.448252	2.29069	2.95679e-08	7.81276e-07	6.02731e-07	789	tags=65%, list=37%, signal=44%	SHCBP1/BIRC5/PLK1/CDT1/KIF2C/HJURP/CDK1/CDC20/GINS2/MCM10/RAD51AP1/CDC45/AURKB/NEK2/TGFB1I1/KIF20A/TTK/VSIG10/CDCA5/E2F8/RAD51/BUB1/FOXM1/DEPDC1B/RRM2/CENPA/PPARG/ESCO2/CDCA3/CDC25A/EXO1/PBK/CDCA8/RECQL4/DTL/NSUN7/GTSE1/OIP5/COCH/SPC24/NUF2/DEPDC1/SPAG5/GINS4/CCNE1/UHRF1/CCNB2/CEP55/UBE2C/CENPM/PHGDH/ZWINT/CLSPN/RAB13/HMMR/HMGB3/CMTM4/CENPF/TPX2/NCAPH/EPAS1/FKBP5/DLGAP5/HMBS/GYG1/TROAP/MANSC1/NT5…	covid
SMID_BREAST_CANCER_RELAPSE_IN_BONE_DN	SMID_BREAST_CANCER_RELAPSE_IN_BONE_DN	43	0.592822	2.5423	3.84948e-08	9.97961e-07	7.69897e-07	452	tags=63%, list=21%, signal=51%	IGHG1/IGLV3-19/IGHV4-34/IGLV3-25/IGKV1D-17/GLDC/POU2AF1/IL1R2/IGHV1-69/IGLC2/IGHV3-7/IGLV3-10/GALNT14/IGKV4-1/IGHV4-61/PLOD2/IGKV3-20/SCRG1/IGHV3-33/UCHL1/PTX3/IGKV1D-13/IGLV2-14/IGKV1D-39/IGHV3-23/COCH/SLPI	covid
SHEDDEN_LUNG_CANCER_GOOD_SURVIVAL_A12	SHEDDEN_LUNG_CANCER_GOOD_SURVIVAL_A12	48	0.557372	2.45533	4.6181e-08	1.17505e-06	9.06515e-07	428	tags=56%, list=20%, signal=46%	IGHG1/IGLV3-19/IGHV4-34/IGKV1D-17/IGHV3-20/SLC2A5/POU2AF1/IGHV1-69/IGLC2/DENND5B/PGLYRP1/IGHM/IGHV3-7/IGHA1/IGKV4-1/IGKC/JCHAIN/IGHV4-61/IGKV3-20/IGHV3-33/IGKV1D-13/TXNDC5/IGKV1D-39/TNFRSF17/SEC14L4/IGHV3-23/SPC24	covid
SALVADOR_MARTIN_PEDIATRIC_TBD_ANTI_TNF_THERAPY_NONRESPONDER_POST_TREATMENT_DN	SALVADOR_MARTIN_PEDIATRIC_TBD_ANTI_TNF_THERAPY_NONRESPONDER_POST_TREATMENT_DN	14	0.796812	2.55199	8.17525e-08	2.04233e-06	1.57559e-06	346	tags=93%, list=16%, signal=78%	IGLV1-44/IGHG1/IGHG2/IGHV4-59/IGHV3-7/IGHA1/IGKV3-11/IGKV1-12/IGKV1-5/IGKC/IGKV3-20/IGHV3-48/IGKV3-15	covid
BLUM_RESPONSE_TO_SALIRASIB_DN	BLUM_RESPONSE_TO_SALIRASIB_DN	74	0.488683	2.33375	9.70283e-08	2.38066e-06	1.83661e-06	562	tags=57%, list=26%, signal=43%	PLK1/KIF2C/CDC6/ORC1/CDK1/CDC20/GINS2/RAD51AP1/CDC45/SDC1/AURKB/NEK2/TRIP13/KIF20A/TTK/RAD51/BUB1/CCNF/RRM2/BUB1B/CENPA/PLOD2/CHEK1/CDC25A/EXO1/PBK/ORC6/RECQL4/E2F1/MYBL2/SLC25A10/COCH/SPAG5/TK1/CCNB2/UBE2C/ZWINT/HMMR/HMGB3/CENPF/TPX2/PLK4	covid
WHITEFORD_PEDIATRIC_CANCER_MARKERS	WHITEFORD_PEDIATRIC_CANCER_MARKERS	45	0.565752	2.46612	9.88335e-08	2.38241e-06	1.83796e-06	870	tags=91%, list=40%, signal=55%	BIRC5/CDK1/GINS2/CDC45/NEK2/TTK/GGH/CDCA2/CDCA5/BUB1/RRM2/CENPA/CDC25A/PBK/CDCA8/RECQL4/E2F1/MYBL2/POLQ/NUF2/UHRF1/TK1/CCNB2/UBE2C/ZWINT/HMGB3/CENPF/TPX2/PLK4/NCAPH/MKI67/DLGAP5/MELK/TOP2A/UBE2T/TYMS/CCNB1/CCNA2/KIF11/PRC1/PTTG1	covid
GRAHAM_CML_DIVIDING_VS_NORMAL_QUIESCENT_UP	GRAHAM_CML_DIVIDING_VS_NORMAL_QUIESCENT_UP	73	0.494996	2.36005	1.01327e-07	2.40041e-06	1.85184e-06	789	tags=71%, list=37%, signal=47%	MPO/BIRC5/KIF2C/TFR2/CDC6/CDK1/CDC20/GINS2/MCM10/RAD51AP1/CDC45/AURKB/NEK2/TRIP13/KIF20A/TTK/GGH/E2F8/RAD51/BUB1/MS4A3/RRM2/BUB1B/CENPA/CHEK1/PBK/OIP5/SPAG5/ITGA2B/KLF1/CCNE1/TK1/CCNB2/CEP55/UBE2C/CENPM/ZWINT/HMMR/CENPF/TPX2/DLGAP5/RNASE2/SLC7A5/NT5DC2/PROS1/MELK/TOP2A/RHAG/TYMS/NCAPG/CCNB1/CCNA2	covid
LEE_DIFFERENTIATING_T_LYMPHOCYTE	LEE_DIFFERENTIATING_T_LYMPHOCYTE	29	-0.566344	-3.11198	1.11947e-07	2.60703e-06	2.01125e-06	779	tags=93%, list=36%, signal=60%	IL7R/RASGRP1/TRAT1/ICOS/NLRC3/CD2/GPR174/ITK/CD96/CD3G/PRKCH/LCK/TRGC2/TRG-AS1/LEF1/EVL/TCF7/GATA3/TRBC2/SH2D1A/BCL11B/UBASH3A/CD3D/CD247/TRBC1/CCDC152/LEF1-AS1	control
REACTOME_NEUTROPHIL_DEGRANULATION	REACTOME_NEUTROPHIL_DEGRANULATION	96	0.460677	2.29557	1.19443e-07	2.73524e-06	2.11015e-06	343	tags=35%, list=16%, signal=31%	OLFM4/DEFA1/CD177/MMP8/DEFA1B/CTSG/ABCA13/CEACAM6/CHIT1/CEACAM8/DEFA4/MPO/OLR1/LTF/LCN2/SLC2A5/CRISP3/ARG1/BPI/RNASE3/HP/MMP9/PGLYRP1/GGH/ORM1/PLAU/CAMP/MS4A3/VNN1/TCN1/PTX3/AZU1/TXNDC5/GPR84	covid
REACTOME_ANTIMICROBIAL_PEPTIDES	REACTOME_ANTIMICROBIAL_PEPTIDES	18	0.73094	2.52325	2.37588e-07	5.35157e-06	4.12858e-06	233	tags=61%, list=11%, signal=55%	DEFA1/DEFA1B/CTSG/DEFA3/DEFA4/LTF/LCN2/BPI/RNASE3/PGLYRP1/CAMP	covid
CHIANG_LIVER_CANCER_SUBCLASS_PROLIFERATION_UP	CHIANG_LIVER_CANCER_SUBCLASS_PROLIFERATION_UP	60	0.517009	2.37814	3.35747e-07	7.4406e-06	5.7402e-06	870	tags=82%, list=40%, signal=50%	SHCBP1/BIRC5/KIF2C/CDC6/HJURP/CDK1/CDC20/RAD51AP1/MMP9/AURKB/NEK2/TRIP13/KIF20A/TTK/CDCA5/E2F8/CD24/FOXM1/DEPDC1B/BUB1B/WASF1/PBK/ORC6/DTL/OIP5/NUF2/DEPDC1/CCNE1/CCNB2/CEP55/ANLN/UBE2C/ZWINT/CENPF/TPX2/MKI67/DLGAP5/NT5DC2/HMGB2/TOP2A/CCNB1/S100P/CCNA2/B4GALT5/UGCG/KIF11/PRC1/CKAP4/PTTG1	covid
LINDGREN_BLADDER_CANCER_CLUSTER_3_UP	LINDGREN_BLADDER_CANCER_CLUSTER_3_UP	55	0.517559	2.34409	6.26183e-07	1.36568e-05	1.05358e-05	777	tags=76%, list=36%, signal=50%	BIRC5/PLK1/CDT1/KIF2C/CDC6/ORC1/CDK1/GINS2/CDC45/PYCR1/NEK2/TRIP13/GGH/E2F8/RAD51/BUB1/RRM2/CENPA/CDC25A/EXO1/CDCA8/E2F1/MYBL2/DEPDC1/RGS16/CCNE1/TK1/CCNB2/CEP55/UBE2C/ZWINT/CENPF/PLK4/DLGAP5/STBD1/HMGB2/MELK/TOP2A/NQO2/TYMS/ACSL1/CCNB1	covid
DODD_NASOPHARYNGEAL_CARCINOMA_DN	DODD_NASOPHARYNGEAL_CARCINOMA_DN	118	0.417312	2.13239	6.81673e-07	1.46347e-05	1.12902e-05	870	tags=68%, list=40%, signal=43%	FN1/BIRC5/ADAMTS2/GRB10/KIF2C/CDC6/HJURP/CDK1/GINS2/MCM10/RAD51AP1/CDC45/PCOLCE2/NEK2/KIF20A/TTK/CDCA2/CDCA5/RAD51/PLAU/BUB1/CCNF/FOXM1/DEPDC1B/RRM2/BUB1B/SLC1A3/CENPA/ESCO2/CHEK1/CDC25A/EXO1/PBK/ORC6/DTL/E2F1/OIP5/POLQ/NUF2/DEPDC1/SPAG5/UHRF1/TK1/CCNB2/CEP55/ANLN/UBE2C/PHGDH/ZWINT/SPATS2/CALD1/HMMR/LAMC1/CENPF/TPX2/PLK4/PCSK6/SERPINE1/NCAPH/FKBP5/MKI67/DLGAP5/SLC7A5/HMGB2/MELK/TOP2A/UBE2T/TYMS/N…	covid
RUIZ_TNC_TARGETS_DN	RUIZ_TNC_TARGETS_DN	51	0.530354	2.37287	7.2632e-07	1.53533e-05	1.18446e-05	502	tags=55%, list=23%, signal=43%	OLR1/SHCBP1/BIRC5/KIF2C/CDC6/HJURP/ORC1/CDK1/GINS2/MCM10/RAD51AP1/CDC45/AURKB/TRIP13/E2F8/PLAU/FOXM1/RRM2/CDC25A/EXO1/PBK/DTL/E2F1/SERPINE2/OIP5/CCNE1/UBE2C/ZWINT	covid
HORIUCHI_WTAP_TARGETS_DN	HORIUCHI_WTAP_TARGETS_DN	69	0.48488	2.29514	8.25567e-07	1.71868e-05	1.32591e-05	789	tags=71%, list=37%, signal=47%	BIRC5/PLK1/KIF2C/HJURP/CDK1/CDC20/RAD51AP1/AURKB/NEK2/TRIP13/KIF20A/TTK/CDCA2/BUB1/FOXM1/RRM2/BUB1B/CENPA/CDCA3/PBK/CDCA8/MYBL2/GTSE1/OIP5/SPC24/NUF2/DEPDC1/SPAG5/UHRF1/TK1/CCNB2/CEP55/ANLN/UBE2C/CENPM/HMMR/TPX2/MKI67/DLGAP5/SULT1B1/TROAP/HMGB2/MELK/TOP2A/CENPW/TYMS/NCAPG/CCNB1/CCNA2	covid
WONG_EMBRYONIC_STEM_CELL_CORE	WONG_EMBRYONIC_STEM_CELL_CORE	43	0.556896	2.38823	8.45434e-07	1.73377e-05	1.33755e-05	735	tags=77%, list=34%, signal=52%	BIRC5/PLK1/GLDC/CDC6/ORC1/CDK1/CDC20/AURKB/NEK2/TRIP13/KIF20A/TTK/CDCA5/BUB1/CCNF/RRM2/BUB1B/CHEK1/CDCA3/EXO1/CDCA8/DTL/MYBL2/GTSE1/SPAG5/CCNB2/SLC2A1/PLK4/NCAPH/DLGAP5/NT5DC2/HMGB2/TOP2A	covid
KONG_E2F3_TARGETS	KONG_E2F3_TARGETS	43	0.556657	2.3872	8.64326e-07	1.74645e-05	1.34733e-05	862	tags=88%, list=40%, signal=54%	SHCBP1/PLK1/KIF2C/CDC6/HJURP/CDC20/RAD51AP1/KIF20A/CDCA5/RAD51/BUB1/CCNF/BUB1B/CDCA3/PBK/NUF2/DEPDC1/CCNE1/TK1/UBE2C/HMMR/CENPF/TPX2/NCAPH/MKI67/DLGAP5/HMGB2/MELK/TOP2A/UBE2T/TYMS/NCAPG/CCNB1/CCNA2/KIF11/MYB/PRC1/GP1BA	covid
GAL_LEUKEMIC_STEM_CELL_DN	GAL_LEUKEMIC_STEM_CELL_DN	67	0.477347	2.24567	9.4312e-07	1.87804e-05	1.44885e-05	825	tags=73%, list=38%, signal=47%	CTSG/SHCBP1/BIRC5/PLK1/CDC6/ORC1/CDK1/CDC20/GINS2/CDC45/IGLC2/MMP9/KIF20A/E2F8/RAD51/BUB1/IGFBP2/MS4A3/IGKC/RRM2/BUB1B/CENPA/AZU1/CDCA8/E2F1/IGLL1/GTSE1/COCH/S100A12/ITGA2B/CCNB2/CENPM/ZWINT/HMMR/CLEC5A/VSIG4/CEBPE/S100A8/RNASE2/MELK/TOP2A/TYMS/NCAPG/CCNB1/S100P/CCNA2/SLC22A4/C3AR1/SLC11A1	covid
HOFFMANN_LARGE_TO_SMALL_PRE_BII_LYMPHOCYTE_UP	HOFFMANN_LARGE_TO_SMALL_PRE_BII_LYMPHOCYTE_UP	45	0.538822	2.34874	1.18397e-06	2.32397e-05	1.79287e-05	789	tags=80%, list=37%, signal=52%	KIF2C/HJURP/CDK1/CDC20/MCM10/CDC45/AURKB/NEK2/TRIP13/KIF20A/TTK/CDCA5/E2F8/RAD51/CAMP/BUB1/RRM2/CENPA/CDCA3/CCNE1/TK1/CCNB2/ANLN/UBE2C/HMGB3/PLK4/NCAPH/MKI67/DLGAP5/NT5DC2/HMGB2/MELK/TOP2A/UBE2T/CCNB1/CCNA2	covid
REACTOME_MITOTIC_SPINDLE_CHECKPOINT	REACTOME_MITOTIC_SPINDLE_CHECKPOINT	16	0.72778	2.41798	1.44049e-06	2.78765e-05	2.15059e-05	548	tags=94%, list=25%, signal=70%	BIRC5/PLK1/KIF2C/CDC20/AURKB/BUB1/BUB1B/CENPA/CDCA8/SPC24/NUF2/UBE2C/CENPM/ZWINT/CENPF	covid
REACTOME_MITOTIC_METAPHASE_AND_ANAPHASE	REACTOME_MITOTIC_METAPHASE_AND_ANAPHASE	24	0.636459	2.38262	1.46288e-06	2.79166e-05	2.15368e-05	548	tags=75%, list=25%, signal=57%	BIRC5/PLK1/KIF2C/CDK1/CDC20/AURKB/CDCA5/BUB1/BUB1B/CENPA/CDCA8/SPC24/NUF2/CCNB2/UBE2C/CENPM/ZWINT/CENPF	covid
BENPORATH_ES_1	BENPORATH_ES_1	45	0.535158	2.33277	1.57551e-06	2.96542e-05	2.28773e-05	639	tags=67%, list=30%, signal=48%	BIRC5/CDT1/GLDC/KIF2C/CDC6/ORC1/CDK1/CDC20/GINS2/MCM10/RAD51AP1/LRRN1/AURKB/CDCA5/CD24/BUB1/RRM2/BUB1B/CHEK1/CDC25A/FZD5/OIP5/COCH/GINS4/ALPL/HMMR/HMGB3/NCAPH/FKBP5/DLGAP5	covid
WANG_RESPONSE_TO_GSK3_INHIBITOR_SB216763_DN	WANG_RESPONSE_TO_GSK3_INHIBITOR_SB216763_DN	66	0.483514	2.26168	1.73353e-06	3.21874e-05	2.48316e-05	562	tags=56%, list=26%, signal=43%	SHCBP1/SLC2A5/BEX1/CDC6/GINS2/MCM10/RAD51AP1/CDC45/TRIP13/E2F8/RAD51/BUB1/RRM2/BUB1B/ESCO2/CDC25A/EXO1/SLCO4A1/PBK/ORC6/B4GALT2/DTL/PKMYT1/MYBL2/SPC24/NUF2/GINS4/CCNE1/UHRF1/TK1/CENPM/ZWINT/CLSPN/HMGB3/SLC2A1/SCD/PLK4	covid
TAKEDA_TARGETS_OF_NUP98_HOXA9_FUSION_16D_DN	TAKEDA_TARGETS_OF_NUP98_HOXA9_FUSION_16D_DN	43	0.547386	2.34745	1.92704e-06	3.49224e-05	2.69416e-05	371	tags=49%, list=17%, signal=41%	MMP8/ABCA13/CEACAM6/CEACAM8/DEFA4/LTF/CRISP3/ARG1/BPI/IL1R2/HP/ERG/TMIGD3/MMP9/PGLYRP1/ITGA9/TACSTD2/TCN1/PTX3/BHLHE41/ANXA3	covid
CAIRO_HEPATOBLASTOMA_CLASSES_UP	CAIRO_HEPATOBLASTOMA_CLASSES_UP	71	0.465557	2.21095	1.93166e-06	3.49224e-05	2.69416e-05	559	tags=55%, list=26%, signal=42%	BIRC5/PLK1/CDT1/GLDC/KIF2C/CDC6/HJURP/CDK1/CDC20/GINS2/MCM10/RAD51AP1/AURKB/NEK2/TRIP13/KIF20A/TTK/BUB1/CCNF/RRM2/BUB1B/CENPA/CHEK1/CDC25A/SLCO4A1/PBK/CDCA8/DTL/GTSE1/OIP5/SPAG5/GINS4/CCNE1/CCNB2/UBE2C/HMMR/HMGB3/CENPF/TPX2	covid
ZHOU_CELL_CYCLE_GENES_IN_IR_RESPONSE_24HR	ZHOU_CELL_CYCLE_GENES_IN_IR_RESPONSE_24HR	39	0.553572	2.32849	2.40992e-06	4.30031e-05	3.31756e-05	870	tags=90%, list=40%, signal=54%	BIRC5/CDK1/CDC20/NEK2/TRIP13/KIF20A/TTK/E2F8/BUB1/CENPA/EXO1/CDCA8/E2F1/MYBL2/NUF2/DEPDC1/SPAG5/UHRF1/CCNB2/CEP55/ANLN/UBE2C/HMMR/HMGB3/CENPF/DLGAP5/HMGB2/MELK/TOP2A/UBE2T/CCNB1/CCNA2/KIF11/PRC1/PTTG1	covid
REACTOME_RESOLUTION_OF_SISTER_CHROMATID_COHESION	REACTOME_RESOLUTION_OF_SISTER_CHROMATID_COHESION	21	0.668823	2.38412	2.6204e-06	4.61552e-05	3.56074e-05	548	tags=81%, list=25%, signal=61%	BIRC5/PLK1/KIF2C/CDK1/CDC20/AURKB/CDCA5/BUB1/BUB1B/CENPA/CDCA8/SPC24/NUF2/CCNB2/CENPM/ZWINT/CENPF	covid
PUJANA_CHEK2_PCC_NETWORK	PUJANA_CHEK2_PCC_NETWORK	66	0.47889	2.24005	2.65376e-06	4.61552e-05	3.56074e-05	789	tags=68%, list=37%, signal=45%	PLK1/CDT1/POU2AF1/KIF2C/CDC6/CDK1/CDC20/RAD51AP1/CDC45/AURKB/TRIP13/TTK/BUB1/CCNF/FOXM1/RRM2/BUB1B/CENPA/CHEK1/EXO1/TNFRSF17/RECQL4/MYBL2/GTSE1/OIP5/SPAG5/CCNB2/UBE2C/ZWINT/HMMR/HMGB3/BIK/CENPF/TPX2/PLK4/MKI67/DLGAP5/SLC7A5/TROAP/HMGB2/MELK/TOP2A/TYMS/CCNB1/CCNA2	covid
CROONQUIST_IL6_DEPRIVATION_DN	CROONQUIST_IL6_DEPRIVATION_DN	44	0.540425	2.33547	2.81443e-06	4.83379e-05	3.72912e-05	789	tags=80%, list=37%, signal=51%	PLK1/KIF2C/SPP1/CDC6/CDK1/CDC20/CDC45/AURKB/TRIP13/GGH/BUB1/CCNF/FOXM1/RRM2/BUB1B/CENPA/CHEK1/CDC25A/MYBL2/OIP5/SPAG5/TK1/CCNB2/UBE2C/ZWINT/HMMR/TPX2/PLK4/NCAPH/MKI67/HMGB2/TOP2A/TYMS/CCNB1/CCNA2	covid
HAHTOLA_SEZARY_SYNDROM_DN	HAHTOLA_SEZARY_SYNDROM_DN	23	-0.558594	-2.77463	3.10803e-06	5.27214e-05	4.0673e-05	757	tags=91%, list=35%, signal=60%	TXK/DUSP2/HOPX/GNLY/GZMB/ADGRG1/KLRD1/GZMK/MYBL1/MATK/SPON2/IL2RB/NELL2/KLRF1/NCAM1/KLRB1/XCL1/CD160/KLRC1/TRDC/PRSS23	control
LINDGREN_BLADDER_CANCER_CLUSTER_1_DN	LINDGREN_BLADDER_CANCER_CLUSTER_1_DN	65	0.474738	2.2113	3.59249e-06	5.97671e-05	4.61085e-05	601	tags=58%, list=28%, signal=43%	BIRC5/PLK1/CDT1/KIF2C/CDC6/ORC1/CDK1/DAAM2/GINS2/CDC45/PYCR1/NEK2/TRIP13/CDCA2/RAD51/BUB1/RRM2/SLC1A3/CENPA/CDC25A/EXO1/CDCA8/E2F1/MYBL2/GTSE1/DEPDC1/RGS16/CCNE1/TK1/CCNB2/UBE2C/ZWINT/HSD3B7/CENPF/PLK4/MYL9/PCSK6/MAP1A	covid
WEI_MYCN_TARGETS_WITH_E_BOX	WEI_MYCN_TARGETS_WITH_E_BOX	57	0.4956	2.26004	3.62038e-06	5.97671e-05	4.61085e-05	523	tags=53%, list=24%, signal=41%	CEACAM6/BIRC5/GRB10/CDC6/CDK1/MCM10/SDC1/AURKB/TRIP13/CDCA5/BUB1/DEPDC1B/RRM2/BMX/BUB1B/CENPA/CHEK1/CDC25A/SLCO4A1/ORC6/B4GALT2/SERPINE2/SLC25A10/DEPDC1/CCNE1/UHRF1/ANLN/EMP1/EPDR1/HMMR	covid
AFFAR_YY1_TARGETS_DN	AFFAR_YY1_TARGETS_DN	59	0.484296	2.22432	3.66059e-06	5.97671e-05	4.61085e-05	562	tags=56%, list=26%, signal=43%	SHCBP1/BIRC5/PLK1/CDT1/KIF2C/SPP1/CDC6/RAD51AP1/PCOLCE2/AURKB/TRIP13/ALOX15B/KIF20A/TTK/IGHM/BUB1/FOXM1/BUB1B/CENPA/CDCA3/EXO1/GPR84/CEACAM4/SPAG5/UHRF1/TK1/CCNB2/IL1R1/HMMR/HMGB3/CENPF/SCD/PLK4	covid
MARKEY_RB1_ACUTE_LOF_UP	MARKEY_RB1_ACUTE_LOF_UP	44	0.537958	2.3248	3.69738e-06	5.97671e-05	4.61085e-05	527	tags=61%, list=24%, signal=47%	BIRC5/PLK1/CDT1/KIF2C/CDC6/HJURP/CDK1/RAD51AP1/CDC45/NEK2/TRIP13/KIF20A/E2F8/RAD51/BUB1/CCNF/RRM2/CENPA/CDCA3/ORC6/DTL/E2F1/TK1/CCNB2/ANLN/IL1R1/HMGB3	covid
REACTOME_GENERATION_OF_SECOND_MESSENGER_MOLECULES	REACTOME_GENERATION_OF_SECOND_MESSENGER_MOLECULES	15	-0.66215	-2.84517	4.45351e-06	7.11526e-05	5.48921e-05	739	tags=100%, list=34%, signal=66%	CD3E/ITK/CD3G/LCK/TRAV19/ZAP70/EVL/TRAV8-4/CD4/CD3D/CD247/HLA-DQA1/TRAV29DV5/HLA-DRB5	control
PID_CD8_TCR_DOWNSTREAM_PATHWAY	PID_CD8_TCR_DOWNSTREAM_PATHWAY	14	-0.67305	-2.76617	4.56895e-06	7.21579e-05	5.56677e-05	715	tags=100%, list=33%, signal=67%	CD3G/STAT4/GZMB/CD8A/EOMES/PRF1/CD8B/CD3D/CD247/IL2RB/FASLG/IFNG/TNFRSF18	control
ODONNELL_TFRC_TARGETS_DN	ODONNELL_TFRC_TARGETS_DN	40	0.54339	2.29089	4.68613e-06	7.31676e-05	5.64466e-05	639	tags=70%, list=30%, signal=50%	SHCBP1/BIRC5/PLK1/CDC6/CDK1/CDC20/AURKB/KIF20A/TTK/BUB1/FOXM1/DEPDC1B/RRM2/BUB1B/CENPA/MYBL2/GTSE1/DEPDC1/CEP55/ANLN/HMMR/CENPF/SCD/PLK4/NCAPH/FKBP5/MKI67/DLGAP5	covid
ZHENG_GLIOBLASTOMA_PLASTICITY_UP	ZHENG_GLIOBLASTOMA_PLASTICITY_UP	54	0.493896	2.23131	5.06857e-06	7.82496e-05	6.03672e-05	562	tags=57%, list=26%, signal=44%	SHCBP1/BIRC5/PLK1/CDT1/SPP1/CDC20/RAD51AP1/CDC45/AURKB/RAD51/CD24/BUB1/CCNF/RRM2/ATP9A/CDCA3/CA3/EXO1/CDCA8/SCN1B/NUF2/SPAG5/OMG/UHRF1/TK1/CCNB2/ANLN/CLSPN/ASPH/TPX2/PLK4	covid
KANG_DOXORUBICIN_RESISTANCE_UP	KANG_DOXORUBICIN_RESISTANCE_UP	32	0.577965	2.31752	5.48918e-06	8.38015e-05	6.46503e-05	765	tags=84%, list=35%, signal=55%	BIRC5/PLK1/CDC6/HJURP/CDK1/CDC20/RAD51AP1/BUB1/FOXM1/RRM2/BUB1B/CENPA/PBK/CDCA8/OIP5/POLQ/TK1/CENPM/ZWINT/HMMR/TPX2/PLK4/MKI67/HMGB2/TOP2A/TYMS/NCAPG	covid
VILLANUEVA_LIVER_CANCER_KRT19_UP	VILLANUEVA_LIVER_CANCER_KRT19_UP	31	0.574923	2.28618	5.72958e-06	8.65103e-05	6.67401e-05	765	tags=84%, list=35%, signal=55%	KIF2C/HJURP/CDC20/MCM10/KIF20A/TTK/BUB1/DEPDC1B/CDCA3/CDC25A/CDCA8/CEP55/ANLN/CENPM/ZWINT/RAB13/TDRD9/TPX2/PLK4/NCAPH/MKI67/DLGAP5/TROAP/MELK/TOP2A/NCAPG	covid
GRAHAM_NORMAL_QUIESCENT_VS_NORMAL_DIVIDING_DN	GRAHAM_NORMAL_QUIESCENT_VS_NORMAL_DIVIDING_DN	41	0.527232	2.24322	5.94384e-06	8.85908e-05	6.83451e-05	502	tags=59%, list=23%, signal=46%	BIRC5/KIF2C/CDC6/CDK1/CDC20/GINS2/MCM10/RAD51AP1/CDC45/TRIP13/GGH/BUB1/RRM2/BUB1B/CHEK1/CDC25A/DTL/OIP5/CCNE1/TK1/CCNB2/CEP55/CENPM/ZWINT	covid
REACTOME_SEPARATION_OF_SISTER_CHROMATIDS	REACTOME_SEPARATION_OF_SISTER_CHROMATIDS	20	0.665871	2.35925	6.04736e-06	8.85908e-05	6.83451e-05	548	tags=80%, list=25%, signal=60%	BIRC5/PLK1/KIF2C/CDC20/AURKB/CDCA5/BUB1/BUB1B/CENPA/CDCA8/SPC24/NUF2/UBE2C/CENPM/ZWINT/CENPF	covid
POOLA_INVASIVE_BREAST_CANCER_UP	POOLA_INVASIVE_BREAST_CANCER_UP	88	0.432135	2.13002	6.0986e-06	8.85908e-05	6.83451e-05	482	tags=43%, list=22%, signal=35%	IGHG1/CEACAM6/FN1/CHIT1/IGLV3-19/IGHV4-34/IGHV3-20/BIRC5/KIF2C/CDK1/CDC20/GINS2/RAD51AP1/IGHV1-69/MMP9/NEK2/TRIP13/KIF20A/IGHM/IGHV3-7/IGLV3-10/RRM2/BUB1B/IGHV4-61/CENPA/IGHV3-33/IGKV1D-13/PBK/DTL/IGLV4-60/IGHV3-23/OIP5/RGS16/IL18R1/PRUNE2/TK1/CCNB2/CEP55	covid
OSMAN_BLADDER_CANCER_DN	OSMAN_BLADDER_CANCER_DN	28	-0.507064	-2.72856	6.12527e-06	8.85908e-05	6.83451e-05	803	tags=86%, list=37%, signal=54%	RPL34/RPL3/SKAP1/RPS6/FCMR/EEF1B2/RPL13/RPL10/RPS27/C12orf57/TRAF5/RPS3A/OCIAD2/NMT2/RASGRF2/ENGASE/SH2D1A/LBH/FAM102A/GZMK/LYRM9/NELL2/ZNF879/UST	control
LEE_EARLY_T_LYMPHOCYTE_UP	LEE_EARLY_T_LYMPHOCYTE_UP	50	0.506855	2.25819	7.34358e-06	0.000105105	8.10854e-05	870	tags=82%, list=40%, signal=50%	BIRC5/KIF2C/CDK1/MCM10/RAD51AP1/NEK2/MZB1/KIF20A/TTK/GGH/CDCA2/E2F8/BUB1/RRM2/BUB1B/CENPA/CDCA3/CDC25A/PBK/DTL/OIP5/NUF2/UHRF1/CCNB2/CEP55/UBE2C/HMMR/HMGB3/MKI67/DLGAP5/MELK/TOP2A/UBE2T/CENPW/TYMS/NCAPG/CCNB1/KIF11/MYB/PRC1/PTTG1	covid
BERENJENO_TRANSFORMED_BY_RHOA_UP	BERENJENO_TRANSFORMED_BY_RHOA_UP	81	0.441022	2.14119	7.65729e-06	0.000108465	8.36776e-05	936	tags=74%, list=43%, signal=44%	BIRC5/KIF2C/SPP1/CDC6/ORC1/CDK1/CDC20/MCM10/RAD51AP1/CDC45/AURKB/NEK2/TRIP13/KIF20A/TTK/CDCA5/E2F8/RAD51/BUB1/CCNF/FOXM1/CENPA/CHEK1/EXO1/ORC6/CDCA8/ANXA3/DTL/E2F1/MYBL2/GTSE1/UHRF1/TK1/ANLN/HMGB3/HTRA1/SLC2A1/PLK4/ELL2/GADD45A/SERPINE1/MKI67/DLGAP5/HMGB2/TOP2A/UBE2T/TYMS/CCNB1/IL1RL1/CCNA2/NEDD4L/KIF11/PRC1/PTTG1/CD151/ADM/PHC2/THBS1/MCM2/GMNN	covid
REACTOME_M_PHASE	REACTOME_M_PHASE	32	0.572079	2.29392	8.61673e-06	0.00012081	9.32014e-05	604	tags=69%, list=28%, signal=50%	BIRC5/PLK1/KIF2C/CDK1/CDC20/AURKB/NEK2/KIF20A/CDCA5/BUB1/BUB1B/CENPA/CDCA8/SPC24/NUF2/CCNB2/UBE2C/CENPM/ZWINT/CENPF/PLK4/NCAPH	covid
WINNEPENNINCKX_MELANOMA_METASTASIS_UP	WINNEPENNINCKX_MELANOMA_METASTASIS_UP	43	0.525063	2.25172	1.14839e-05	0.000159383	0.000122959	777	tags=77%, list=36%, signal=50%	SHCBP1/BIRC5/KIF2C/CDC6/CDK1/GINS2/CDC45/NEK2/CDCA5/BUB1/RRM2/CENPA/PLOD2/CHEK1/EXO1/CDCA8/NUF2/SPAG5/UHRF1/TK1/CCNB2/CEP55/ANLN/ZWINT/CENPF/NCAPH/DLGAP5/MELK/TOP2A/UBE2T/TYMS/NCAPG/CCNB1	covid
CASORELLI_ACUTE_PROMYELOCYTIC_LEUKEMIA_DN	CASORELLI_ACUTE_PROMYELOCYTIC_LEUKEMIA_DN	99	0.414199	2.07493	1.19975e-05	0.000164846	0.000127174	861	tags=68%, list=40%, signal=43%	MAOA/BIRC5/PLK1/BEX1/KIF2C/VWF/TFR2/CDC6/ORC1/CDK1/CDC20/GINS2/CDC45/AURKB/NEK2/TRIP13/KIF20A/FOXM1/RRM2/BUB1B/CENPA/PLOD2/CHEK1/CDC25A/RECQL4/FZD5/SERPINE2/GTSE1/POLQ/SPAG5/ITGA2B/GINS4/KLF1/TK1/CCNB2/CEP55/CENPM/ZWINT/HMMR/HMGB3/CENPF/SCD/MMRN1/PCYT1B/NCAPH/HPGD/MKI67/DLGAP5/RNASE2/PROS1/MELK/TOP2A/TYMS/NCAPG/CCNB1/MAPK14/GP1BB/CCNA2/PGD/PTGS1/LAPTM4B/CD59/KIF11/FADS2/PRC1/CKAP4/FHL2	covid
REACTOME_MITOTIC_PROMETAPHASE	REACTOME_MITOTIC_PROMETAPHASE	28	0.588338	2.27343	1.37705e-05	0.000187334	0.000144523	604	tags=71%, list=28%, signal=52%	BIRC5/PLK1/KIF2C/CDK1/CDC20/AURKB/NEK2/CDCA5/BUB1/BUB1B/CENPA/CDCA8/SPC24/NUF2/CCNB2/CENPM/ZWINT/CENPF/PLK4/NCAPH	covid
MCLACHLAN_DENTAL_CARIES_UP	MCLACHLAN_DENTAL_CARIES_UP	56	0.475556	2.1585	1.53833e-05	0.000207222	0.000159865	400	tags=43%, list=19%, signal=36%	IGHG1/IGKV1D-17/IGHV3-20/POU2AF1/SPP1/RNASE1/IGHV1-69/IGLC2/MMP9/MZB1/IGHM/IGHA1/ORM1/PLAU/IGKV4-1/IGKC/JCHAIN/IGHV4-61/IGKV3-20/IGKV1D-13/IGLV2-14/IGKV1D-39/SERPINE2/IGHV3-23	covid
SARRIO_EPITHELIAL_MESENCHYMAL_TRANSITION_UP	SARRIO_EPITHELIAL_MESENCHYMAL_TRANSITION_UP	46	0.5059	2.21021	1.62419e-05	0.000216663	0.000167149	861	tags=80%, list=40%, signal=49%	PLK1/CDC6/CDK1/CDC45/SAPCD2/SMTN/KIF20A/CDCA5/RAD51/BUB1/FOXM1/RRM2/BUB1B/CENPA/EXO1/ORC6/RECQL4/DTL/E2F1/SERPINE2/PKMYT1/UHRF1/CEP55/ANLN/ZWINT/HMMR/PLK4/MKI67/TOP2A/UBE2T/CENPW/TYMS/CCNB1/CCNA2/KIF11/PRC1/FHL2	covid
MUELLER_PLURINET	MUELLER_PLURINET	44	0.515426	2.22743	1.80715e-05	0.000238753	0.000184191	577	tags=61%, list=27%, signal=46%	BIRC5/CDT1/ORC1/CDK1/MCM10/CDC45/AURKB/TRIP13/RAD51/BUB1B/CHEK1/EXO1/ORC6/RECQL4/ANXA3/MYBL2/POLQ/SPAG5/CCNE1/TK1/CCNB2/PHGDH/HMMR/BIK/TPX2/GADD45A/PCYT1B	covid
CROONQUIST_NRAS_SIGNALING_DN	CROONQUIST_NRAS_SIGNALING_DN	32	0.558953	2.24128	2.08793e-05	0.00027322	0.000210781	789	tags=84%, list=37%, signal=54%	PLK1/KIF2C/CDC6/CDK1/CDC20/AURKB/TRIP13/FOXM1/BUB1B/CENPA/PLOD2/CHEK1/MYBL2/OIP5/SPAG5/TK1/CCNB2/UBE2C/ZWINT/TPX2/PLK4/NCAPH/MKI67/HMGB2/TOP2A/CCNB1/CCNA2	covid
REACTOME_COSTIMULATION_BY_THE_CD28_FAMILY	REACTOME_COSTIMULATION_BY_THE_CD28_FAMILY	14	-0.640355	-2.6318	2.26199e-05	0.000293205	0.000226199	785	tags=100%, list=36%, signal=64%	ICOS/CD3E/CD3G/LCK/TRAV19/CD28/TRAV8-4/CD4/CD3D/CD247/HLA-DQA1/TRAV29DV5/HLA-DRB5	control
DESERT_STEM_CELL_HEPATOCELLULAR_CARCINOMA_SUBCLASS_UP	DESERT_STEM_CELL_HEPATOCELLULAR_CARCINOMA_SUBCLASS_UP	48	0.489216	2.15509	2.50235e-05	0.00032133	0.000247897	870	tags=77%, list=40%, signal=47%	RAP1GAP/KIF2C/SPP1/HJURP/CDK1/RAD51AP1/MMP9/TRIP13/KIF20A/TTK/BUB1/BUB1B/CENPA/CDC25A/UCHL1/BAMBI/SERPINE2/COCH/SPAG5/CEP55/UBE2C/CENPM/SPATS2/LAMC1/TPX2/SMOX/DLGAP5/TROAP/NT5DC2/TOP2A/NCAPG/UGCG/LAPTM4B/KIF11/PRC1/CKAP4/PTTG1	covid
PID_CD8_TCR_PATHWAY	PID_CD8_TCR_PATHWAY	13	-0.636788	-2.5379	2.73294e-05	0.00034769	0.000268233	792	tags=100%, list=37%, signal=64%	RASGRP1/PLCG1/CD3E/CD3G/LCK/CD28/ZAP70/CD8A/PRF1/CD8B/CD3D/CD247	control
FUJII_YBX1_TARGETS_DN	FUJII_YBX1_TARGETS_DN	41	0.505113	2.14911	2.77285e-05	0.000349531	0.000269653	604	tags=61%, list=28%, signal=45%	SHCBP1/CDT1/CDC6/GINS2/MCM10/TRIP13/RAD51/CCNF/FOXM1/DEPDC1B/RRM2/BUB1B/CHEK1/CDC25A/EXO1/DTL/MYBL2/OIP5/DEPDC1/UHRF1/TK1/ZWINT/HMGB3/PLK4/NCAPH	covid
KEGG_NATURAL_KILLER_CELL_MEDIATED_CYTOTOXICITY	KEGG_NATURAL_KILLER_CELL_MEDIATED_CYTOTOXICITY	16	-0.611237	-2.65536	2.81972e-05	0.000352209	0.000271718	750	tags=94%, list=35%, signal=62%	CD244/PLCG1/LCK/ZAP70/KLRC3/GZMB/SH2D1A/PRF1/KLRD1/CD247/KLRK1/FASLG/SH2D1B/IFNG/KLRC1	control
REACTOME_TCR_SIGNALING	REACTOME_TCR_SIGNALING	19	-0.553483	-2.60756	3.04523e-05	0.00037695	0.000290805	792	tags=89%, list=37%, signal=57%	CARD11/TRAT1/PLCG1/CD3E/ITK/CD3G/LCK/TRAV19/ZAP70/EVL/TRAV8-4/CD4/CD3D/CD247/HLA-DQA1/TRAV29DV5/HLA-DRB5	control
PUJANA_BRCA1_PCC_NETWORK	PUJANA_BRCA1_PCC_NETWORK	116	0.385072	1.97099	3.78601e-05	0.000464462	0.000358318	562	tags=44%, list=26%, signal=34%	PLK1/BPI/CDT1/POU2AF1/KIF2C/CDC6/ORC1/CDK1/CDC20/RAD51AP1/CACNA1E/CDC45/PYCR1/AURKB/NEK2/TRIP13/TTK/IGHM/GGH/RAD51/BUB1/CCNF/FOXM1/RRM2/JCHAIN/ITPK1/BUB1B/CENPA/CHEK1/CDC25A/EXO1/TNFRSF17/RECQL4/E2F1/PKMYT1/MYBL2/IGLL1/GTSE1/OIP5/SPAG5/ITGA2B/CCNE1/TK1/CCNB2/UBE2C/ZWINT/HMMR/HMGB3/CENPF/TPX2/PLK4	covid
ZHAN_MULTIPLE_MYELOMA_PR_UP	ZHAN_MULTIPLE_MYELOMA_PR_UP	23	0.601947	2.22895	3.93261e-05	0.000476708	0.000367766	777	tags=91%, list=36%, signal=59%	BIRC5/CDK1/MCM10/NEK2/TRIP13/TTK/E2F8/FOXM1/DEPDC1B/RRM2/BUB1B/SPC24/NUF2/CCNB2/UBE2C/TPX2/DLGAP5/TOP2A/UBE2T/TYMS/CCNB1	covid
CUI_TCF21_TARGETS_2_UP	CUI_TCF21_TARGETS_2_UP	51	0.483931	2.16517	3.95522e-05	0.000476708	0.000367766	559	tags=57%, list=26%, signal=43%	FN1/MAOA/ADAMTS2/CDT1/BEX1/HJURP/CDK1/CDC45/PYCR1/CDCA5/RAD51/CLDN9/IGFBP2/CENPA/CDCA3/CDCA8/B4GALT2/DTL/SPC24/NUF2/UHRF1/TK1/CCNB2/CA4/UBE2C/PHGDH/HMMR/HMGB3/TPX2	covid
GOLDRATH_ANTIGEN_RESPONSE	GOLDRATH_ANTIGEN_RESPONSE	94	0.402159	1.99976	4.46454e-05	0.000533415	0.000411514	492	tags=41%, list=23%, signal=33%	IGHV1-69-2/IGHG1/BIRC5/PLK1/KIF2C/CDC6/CDK1/CDC20/MCM10/RAD51AP1/CDC45/PGLYRP1/AURKB/NEK2/TRIP13/KIF20A/TTK/GGH/CDCA5/E2F8/RAD51/CA1/CD24/BUB1/CCNF/RRM2/JCHAIN/CENPA/CHEK1/CDCA3/CDCA8/DTL/GTSE1/SLPI/IL18R1/TK1/CCNB2/ANLN/EMP1	covid
RASHI_RESPONSE_TO_IONIZING_RADIATION_6	RASHI_RESPONSE_TO_IONIZING_RADIATION_6	12	0.724828	2.21195	4.81023e-05	0.000569764	0.000439556	497	tags=92%, list=23%, signal=71%	IGHV1-69-2/IGHG1/IL1R2/RAD51AP1/RNASE1/IGHM/IGKV1-27/IGHV3-23/SLPI/IL18R1/IGKV1D-12	covid
MITSIADES_RESPONSE_TO_APLIDIN_DN	MITSIADES_RESPONSE_TO_APLIDIN_DN	36	0.524196	2.15474	5.41364e-05	0.000635756	0.000490467	789	tags=78%, list=37%, signal=50%	SHCBP1/BIRC5/CDT1/HJURP/NEK2/TRIP13/BUB1/FOXM1/RRM2/BUB1B/CENPA/CDCA8/MYBL2/CCNE1/KAZN/ZWINT/CENPF/SCD/TPX2/NCAPH/MKI67/DLGAP5/MELK/TOP2A/TYMS/NCAPG/CCNB1/CCNA2	covid
REACTOME_RHO_GTPASES_ACTIVATE_FORMINS	REACTOME_RHO_GTPASES_ACTIVATE_FORMINS	19	0.625783	2.19954	6.32282e-05	0.000736233	0.000567982	548	tags=74%, list=25%, signal=55%	BIRC5/PLK1/KIF2C/CDC20/AURKB/BUB1/BUB1B/CENPA/CDCA8/SPC24/NUF2/CENPM/ZWINT/CENPF	covid
REACTOME_EXTRACELLULAR_MATRIX_ORGANIZATION	REACTOME_EXTRACELLULAR_MATRIX_ORGANIZATION	42	0.495265	2.11426	6.44545e-05	0.000744206	0.000574133	175	tags=33%, list=8%, signal=31%	MMP8/CTSG/CEACAM6/FN1/CEACAM8/ADAMTS2/VWF/SPP1/ITGA7/COL17A1/SDC1/PCOLCE2/MMP9/ITGA9	covid
MORI_IMMATURE_B_LYMPHOCYTE_DN	MORI_IMMATURE_B_LYMPHOCYTE_DN	35	0.5273	2.14934	6.68846e-05	0.000765829	0.000590814	789	tags=77%, list=37%, signal=50%	HJURP/CDK1/CDC20/MCM10/CDC45/NEK2/TTK/CDCA5/E2F8/RAD51/RRM2/CENPA/CHEK1/CDCA3/DTL/IGLL1/CCNB2/UBE2C/HMGB3/NCAPH/MKI67/DLGAP5/HMGB2/MELK/TOP2A/CCNB1/CCNA2	covid
GARCIA_TARGETS_OF_FLI1_AND_DAX1_DN	GARCIA_TARGETS_OF_FLI1_AND_DAX1_DN	22	0.600672	2.18711	7.00051e-05	0.000794934	0.000613268	502	tags=68%, list=23%, signal=53%	CDC6/GINS2/MCM10/CDCA5/RRM2/ESCO2/CHEK1/CDC25A/DTL/MYBL2/SLC25A10/KIAA0319/CCNE1/CENPM/ZWINT	covid
REACTOME_G2_M_CHECKPOINTS	REACTOME_G2_M_CHECKPOINTS	17	0.648575	2.20746	7.39561e-05	0.000832915	0.000642569	514	tags=76%, list=24%, signal=59%	CDC6/ORC1/CDK1/MCM10/CDC45/CHEK1/CDC25A/EXO1/ORC6/PKMYT1/GTSE1/CCNB2/CLSPN	covid
REACTOME_S_PHASE	REACTOME_S_PHASE	18	0.641453	2.21433	8.10555e-05	0.00090545	0.000698527	491	tags=72%, list=23%, signal=56%	CDT1/CDC6/ORC1/GINS2/CDC45/CDCA5/ESCO2/CDC25A/ORC6/E2F1/GINS4/CCNE1/UBE2C	covid
FEVR_CTNNB1_TARGETS_DN	FEVR_CTNNB1_TARGETS_DN	54	0.456733	2.06341	8.27109e-05	0.00091649	0.000707045	527	tags=50%, list=24%, signal=39%	SHCBP1/BIRC5/CDT1/CDC6/CDK1/CDC20/RAD51AP1/AURKB/TRIP13/KIF20A/TTK/RAD51/BUB1/FOXM1/RRM2/BUB1B/PPARG/CHEK1/EXO1/ORC6/E2F1/SERPINE2/NUF2/SPAG5/CCNB2/PHGDH/HMGB3	covid
FOURNIER_ACINAR_DEVELOPMENT_LATE_2	FOURNIER_ACINAR_DEVELOPMENT_LATE_2	54	0.453629	2.04939	9.40755e-05	0.00103343	0.000797258	443	tags=43%, list=21%, signal=35%	FN1/BIRC5/PLK1/KIF2C/CDC6/HJURP/CDK1/GINS2/CDC45/TRIP13/SMTN/TTK/CCNF/FOXM1/RRM2/CENPA/CDCA3/CDC25A/TXNDC5/DTL/SERPINE2/POLQ/DEPDC1	covid
REACTOME_PD_1_SIGNALING	REACTOME_PD_1_SIGNALING	11	-0.672108	-2.50287	9.47684e-05	0.00103343	0.000797258	715	tags=100%, list=33%, signal=67%	CD3G/LCK/TRAV19/TRAV8-4/CD4/CD3D/CD247/HLA-DQA1/TRAV29DV5/HLA-DRB5	control
WP_CELL_CYCLE	WP_CELL_CYCLE	26	0.556462	2.12596	0.000121216	0.00131142	0.00101172	574	tags=65%, list=27%, signal=49%	PLK1/CDC6/ORC1/CDK1/CDC20/CDC45/TTK/BUB1/CHEK1/CDC25A/ORC6/E2F1/PKMYT1/CCNE1/CCNB2/CDKN2B/GADD45A	covid
REACTOME_G1_S_SPECIFIC_TRANSCRIPTION	REACTOME_G1_S_SPECIFIC_TRANSCRIPTION	12	0.701977	2.14221	0.000123248	0.00132299	0.00102065	476	tags=83%, list=22%, signal=65%	CDT1/CDC6/ORC1/CDK1/CDC45/RRM2/CDC25A/E2F1/CCNE1/TK1	covid
NAKAYAMA_SOFT_TISSUE_TUMORS_PCA2_UP	NAKAYAMA_SOFT_TISSUE_TUMORS_PCA2_UP	35	0.516669	2.106	0.000129309	0.00137729	0.00106254	789	tags=77%, list=37%, signal=50%	BIRC5/KIF2C/HJURP/CDK1/CDC20/NEK2/KIF20A/BUB1/RRM2/CENPA/PBK/CDCA8/GTSE1/CCNB2/CEP55/UBE2C/HMMR/CENPF/TPX2/NCAPH/MKI67/DLGAP5/SLC7A5/MELK/TOP2A/CCNB1/CCNA2	covid
BURTON_ADIPOGENESIS_3	BURTON_ADIPOGENESIS_3	38	0.506659	2.10879	0.000136799	0.00144586	0.00111543	856	tags=79%, list=40%, signal=48%	BIRC5/PLK1/KIF2C/CDC6/CDK1/CDC20/MCM10/RAD51AP1/CDC45/KIF20A/TTK/E2F8/RAD51/BUB1/CCNF/RRM2/CDCA8/DTL/TK1/CCNB2/NCAPH/MKI67/DLGAP5/HMGB2/TOP2A/TYMS/CCNB1/KLF5/KIF11/PRC1	covid
SHEPARD_CRASH_AND_BURN_MUTANT_DN	SHEPARD_CRASH_AND_BURN_MUTANT_DN	36	0.508051	2.08838	0.000139167	0.00145966	0.00112609	639	tags=64%, list=30%, signal=46%	SHCBP1/BIRC5/KIF2C/CDK1/CDC20/AURKB/SMTN/TTK/CDCA2/FOXM1/BUB1B/CDCA3/FZD5/GTSE1/OIP5/TK1/CCNB2/CEP55/ANLN/TPX2/PLK4/MKI67/DLGAP5	covid
ZHOU_CELL_CYCLE_GENES_IN_IR_RESPONSE_6HR	ZHOU_CELL_CYCLE_GENES_IN_IR_RESPONSE_6HR	27	0.566387	2.17577	0.000141818	0.0014762	0.00113884	527	tags=67%, list=24%, signal=51%	CDT1/GINS2/NEK2/TRIP13/KIF20A/TTK/CDCA5/E2F8/RAD51/CENPA/EXO1/CDCA8/DTL/E2F1/MYBL2/UHRF1/CEP55/HMGB3	covid
VILIMAS_NOTCH1_TARGETS_UP	VILIMAS_NOTCH1_TARGETS_UP	18	-0.536734	-2.50531	0.000144539	0.00149321	0.00115197	1009	tags=89%, list=47%, signal=48%	CD74/CARD11/TRAT1/CD2/CD3G/TRAF1/LCK/CCR7/CD28/ZAP70/GZMB/GATA3/CD7/GZMA/CD3D/TNFRSF18	control
CHEMNITZ_RESPONSE_TO_PROSTAGLANDIN_E2_UP	CHEMNITZ_RESPONSE_TO_PROSTAGLANDIN_E2_UP	34	0.516929	2.09143	0.00014977	0.0015249	0.00117642	870	tags=82%, list=40%, signal=50%	BIRC5/CDC6/HJURP/CDC45/TGFB1I1/KIF20A/TTK/BUB1/RRM2/BUB1B/GTSE1/SPAG5/UHRF1/TK1/CCNB2/UBE2C/CENPF/TPX2/NCAPH/MKI67/DLGAP5/TOP2A/DYSF/NCAPG/CCNB1/KIF3C/PRC1/PTTG1	covid
TANG_SENESCENCE_TP53_TARGETS_DN	TANG_SENESCENCE_TP53_TARGETS_DN	26	0.553907	2.1162	0.000149827	0.0015249	0.00117642	884	tags=92%, list=41%, signal=55%	BIRC5/CDK1/CDC20/AURKB/NEK2/KIF20A/TTK/BUB1/CENPA/CDC25A/PBK/SPAG5/TK1/CCNB2/UBE2C/TPX2/PLK4/TOP2A/CCNA2/KIF11/PRC1/PTTG1/NRGN/QPCT	covid
RHEIN_ALL_GLUCOCORTICOID_THERAPY_DN	RHEIN_ALL_GLUCOCORTICOID_THERAPY_DN	51	0.461551	2.06504	0.00015497	0.00155181	0.00119718	870	tags=73%, list=40%, signal=44%	SHCBP1/BIRC5/CDK1/ERG/GINS2/RAD51AP1/TTK/GGH/E2F8/RAD51/RRM2/BUB1B/ATP9A/CHEK1/CDC25A/WASF1/DTL/IGLL1/CCNB2/CEP55/EMP1/ZWINT/RAB13/HMMR/HMGB3/SERPINE1/MELK/TOP2A/TYMS/NCAPG/SPARC/PGD/LAPTM4B/KIF11/MYB/PRC1/PTTG1	covid
KEGG_CELL_CYCLE	KEGG_CELL_CYCLE	27	0.565072	2.17071	0.000155072	0.00155181	0.00119718	574	tags=67%, list=27%, signal=50%	PLK1/CDC6/ORC1/CDK1/CDC20/CDC45/TTK/BUB1/BUB1B/CHEK1/CDC25A/ORC6/E2F1/PKMYT1/CCNE1/CCNB2/CDKN2B/GADD45A	covid
JISON_SICKLE_CELL_DISEASE_DN	JISON_SICKLE_CELL_DISEASE_DN	17	-0.560867	-2.51148	0.000155859	0.00155181	0.00119718	799	tags=94%, list=37%, signal=60%	EEF1A1/GPR183/RPS6/EEF1B2/RPL13/DUSP2/TRAF5/CCR7/DYRK2/TBC1D4/HLCS/FAM102A/NELL2/MID2/KLRK1/B4GAT1	control
CAIRO_LIVER_DEVELOPMENT_DN	CAIRO_LIVER_DEVELOPMENT_DN	27	0.562977	2.16267	0.000173627	0.00171628	0.00132406	233	tags=41%, list=11%, signal=37%	OLFM4/FN1/MPO/LTF/LCN2/ARG1/GLDC/TFR2/HP/PGLYRP1/CAMP	covid
FINETTI_BREAST_CANCER_KINOME_RED	FINETTI_BREAST_CANCER_KINOME_RED	12	0.695426	2.12222	0.000176515	0.00173237	0.00133647	335	tags=75%, list=16%, signal=64%	PLK1/CDK1/AURKB/NEK2/TTK/BUB1/BUB1B/CHEK1/PBK	covid
SERVITJA_LIVER_HNF1A_TARGETS_UP	SERVITJA_LIVER_HNF1A_TARGETS_UP	29	0.533931	2.08403	0.000181094	0.0017647	0.00136142	591	tags=66%, list=27%, signal=48%	MAOA/KIF2C/CDC20/AURKB/NEK2/KIF20A/BUB1/PPARG/ESCO2/CDCA8/RGS16/SLPI/CCNB2/ANLN/UBE2C/HMMR/SCD/TPX2/SERPINE1	covid
LE_EGR2_TARGETS_UP	LE_EGR2_TARGETS_UP	27	0.559598	2.14969	0.000189531	0.00183392	0.00141481	856	tags=89%, list=40%, signal=54%	BIRC5/PLK1/KIF2C/CDK1/CDC20/KIF20A/RAD51/BUB1/RRM2/CDCA8/UHRF1/CCNB2/PLK4/NCAPH/MKI67/NT5DC2/HMGB2/TOP2A/UBE2T/CCNB1/CCNA2/KIF11/BASP1/PRC1	covid
PETROVA_ENDOTHELIUM_LYMPHATIC_VS_BLOOD_UP	PETROVA_ENDOTHELIUM_LYMPHATIC_VS_BLOOD_UP	39	0.489338	2.0583	0.000213106	0.00204761	0.00157967	789	tags=72%, list=37%, signal=46%	MAOA/PLK1/KIF2C/CDK1/AURKB/ITGA9/TTK/BUB1/IGFBP2/FOXM1/BUB1B/PPARG/MYBL2/SPAG5/RGS16/TBXA2R/TK1/CCNB2/UBE2C/CENPF/PCSK6/DYRK3/PYGL/CEACAM1/HMGB2/TOP2A/CCNB1/CCNA2	covid
KEGG_ANTIGEN_PROCESSING_AND_PRESENTATION	KEGG_ANTIGEN_PROCESSING_AND_PRESENTATION	10	-0.660581	-2.36935	0.000234932	0.0022297	0.00172014	608	tags=90%, list=28%, signal=65%	KLRC3/CD8A/CD4/CD8B/KLRD1/HLA-DQA1/KLRC4/KLRC1/HLA-DRB5	control
PID_TCR_PATHWAY	PID_TCR_PATHWAY	12	-0.636491	-2.46583	0.000235303	0.0022297	0.00172014	792	tags=100%, list=37%, signal=64%	RASGRP1/PLCG1/CD3E/ITK/CD3G/LCK/CD28/ZAP70/CD4/CD3D/CD247	control
WHITFIELD_CELL_CYCLE_LITERATURE	WHITFIELD_CELL_CYCLE_LITERATURE	27	0.550903	2.11628	0.000269054	0.00253206	0.00195341	548	tags=63%, list=25%, signal=48%	BIRC5/PLK1/CDC6/CDK1/CDC20/CDC45/KIF20A/BUB1/CCNF/RRM2/BUB1B/CENPA/CDC25A/E2F1/CCNE1/CCNB2/CENPF	covid
MANALO_HYPOXIA_DN	MANALO_HYPOXIA_DN	39	0.48427	2.03699	0.000272568	0.00254767	0.00196545	502	tags=51%, list=23%, signal=40%	SHCBP1/CDC6/HJURP/CDK1/GINS2/MCM10/RAD51AP1/TRIP13/RAD51/CCNF/RRM2/EXO1/SLCO4A1/PBK/ORC6/PKMYT1/SLC25A10/OIP5/CCNE1/ZWINT	covid
PATIL_LIVER_CANCER	PATIL_LIVER_CANCER	89	0.38514	1.8981	0.000279232	0.00257933	0.00198988	904	tags=66%, list=42%, signal=40%	LCN2/PLK1/VWF/SPP1/CDC6/HJURP/CDK1/CDC45/NEK2/TRIP13/CDCA5/CD24/BUB1/FOXM1/DEPDC1B/RRM2/PPARG/ESCO2/CHEK1/CDC25A/PBK/CDCA8/RECQL4/DTL/E2F1/PKMYT1/MYBL2/NUF2/TK1/CEP55/UBE2C/CENPM/ZWINT/SPATS2/OSBP2/HMMR/CENPF/SCD/TPX2/PLK4/DLGAP5/TROAP/CYSTM1/TOP2A/UBE2T/CENPW/TYMS/SPARC/S100P/CCNA2/NEDD4L/TP53I3/LAPTM4B/KIF11/FADS2/PTTG1/WNK1/BSG/SLC26A6	covid
SMID_BREAST_CANCER_ERBB2_UP	SMID_BREAST_CANCER_ERBB2_UP	27	0.550117	2.11327	0.000279709	0.00257933	0.00198988	682	tags=74%, list=32%, signal=51%	CEACAM6/IGKV1D-17/CRISP3/IGLC2/IGHV3-7/CAMP/IGKV4-1/ATP2C2/IGHV4-61/IGKV3-20/IGKV1D-13/IGKV1D-39/IGHV3-23/SLPI/ASPH/BIK/SCD/ELL2/S100A8/ORM2	covid
RHODES_UNDIFFERENTIATED_CANCER	RHODES_UNDIFFERENTIATED_CANCER	22	0.573395	2.08779	0.000288393	0.00264168	0.00203797	789	tags=86%, list=37%, signal=55%	BIRC5/KIF2C/CDC6/CDK1/CDC20/TRIP13/GGH/FOXM1/CENPA/MYBL2/UBE2C/NCAPH/DLGAP5/SLC7A5/HMGB2/MELK/TOP2A/CCNB1/CCNA2	covid
KIM_WT1_TARGETS_DN	KIM_WT1_TARGETS_DN	45	0.455005	1.98338	0.000300385	0.0027333	0.00210866	789	tags=67%, list=37%, signal=43%	SHCBP1/KIF2C/HJURP/CDK1/CDC20/RAD51AP1/AURKB/NEK2/KIF20A/TTK/BUB1/CCNF/BUB1B/CENPA/PLOD2/CDCA3/BHLHE41/CDCA8/GTSE1/OIP5/CEP55/CENPF/MGAM/DLGAP5/HMGB2/TOP2A/KLHL2/NCAPG/MAPK14/CCNA2	covid
BIOCARTA_NO2IL12_PATHWAY	BIOCARTA_NO2IL12_PATHWAY	10	-0.645688	-2.31593	0.000351485	0.00316106	0.00243866	771	tags=100%, list=36%, signal=65%	CD2/CD3E/CD3G/STAT4/CD4/CD3D/CD247/IL12RB2/IFNG	control
REACTOME_SIGNALING_BY_ROBO_RECEPTORS	REACTOME_SIGNALING_BY_ROBO_RECEPTORS	11	-0.631063	-2.35002	0.000353203	0.00316106	0.00243866	803	tags=100%, list=37%, signal=63%	RPL3/RPS6/RPL13/RPL10/RPS27/RPL9/RPS3A/EVL/NELL2/AKAP5	control
BOYLAN_MULTIPLE_MYELOMA_PCA1_UP	BOYLAN_MULTIPLE_MYELOMA_PCA1_UP	34	0.501272	2.02809	0.000354296	0.00316106	0.00243866	260	tags=38%, list=12%, signal=34%	CD177/CTSG/IGHG1/MPO/LTF/LCN2/CRISP3/HP/IGHA2/MMP9/PGLYRP1/CAMP/JCHAIN	covid
FARMER_BREAST_CANCER_CLUSTER_1	FARMER_BREAST_CANCER_CLUSTER_1	21	0.57858	2.06243	0.000358468	0.00317765	0.00245146	366	tags=52%, list=17%, signal=44%	IGHG1/POU2AF1/IGLC2/MZB1/IGHM/IGHA1/JCHAIN/IGKV3-20/IGKV1D-13/IGLV2-14/TNFRSF17	covid
BOYAULT_LIVER_CANCER_SUBCLASS_G3_UP	BOYAULT_LIVER_CANCER_SUBCLASS_G3_UP	18	0.608883	2.1019	0.000363479	0.00320141	0.00246979	804	tags=94%, list=37%, signal=60%	KIF2C/CDC6/HJURP/RAD51AP1/TRIP13/TTK/BUB1/PLOD2/CEP55/CENPM/HMMR/MELK/NCAPG/KIF1B/CCNA2/UGCG/PGD	covid
FISCHER_G1_S_CELL_CYCLE	FISCHER_G1_S_CELL_CYCLE	33	0.505214	2.03097	0.000369214	0.00323121	0.00249278	549	tags=61%, list=25%, signal=46%	CDT1/CDC6/GINS2/MCM10/FAM111B/E2F8/RAD51/RRM2/CHEK1/CDC25A/EXO1/RECQL4/DTL/E2F1/CCNE1/PLSCR4/CLSPN/ASPH/LIPH/MITF	covid
BENPORATH_PROLIFERATION	BENPORATH_PROLIFERATION	38	0.489053	2.03551	0.000379688	0.00330184	0.00254727	548	tags=58%, list=25%, signal=44%	BIRC5/CDT1/CDK1/RAD51AP1/NEK2/TTK/CDCA5/RAD51/BUB1/RRM2/CENPA/EXO1/PBK/DTL/PKMYT1/MYBL2/NUF2/SPAG5/CCNB2/ANLN/CENPM/CENPF	covid
MORI_PRE_BI_LYMPHOCYTE_UP	MORI_PRE_BI_LYMPHOCYTE_UP	29	0.516132	2.01456	0.000395399	0.00340853	0.00262958	735	tags=72%, list=34%, signal=48%	HJURP/CDK1/CDC20/TTK/CDCA5/E2F8/RAD51/RRM2/CDCA3/DTL/IGLL1/ANKRD33B/CCNB2/UBE2C/EMP1/PHGDH/HMGB3/NCAPH/MKI67/MELK/TOP2A	covid
ISHIDA_E2F_TARGETS	ISHIDA_E2F_TARGETS	27	0.542092	2.08244	0.000396918	0.00340853	0.00262958	870	tags=89%, list=40%, signal=54%	CDT1/KIF2C/CDK1/CDC20/AURKB/TRIP13/E2F8/RAD51/BUB1/RRM2/CCNE1/TK1/CCNB2/ANLN/HMGB3/NCAPH/MKI67/HMGB2/TOP2A/UBE2T/CCNB1/CCNA2/PRC1/PTTG1	covid
SMID_BREAST_CANCER_LUMINAL_B_DN	SMID_BREAST_CANCER_LUMINAL_B_DN	103	0.36462	1.83139	0.000415961	0.00354988	0.00273863	400	tags=34%, list=19%, signal=29%	IGHG1/IGLV3-19/IGHV4-34/IGLV3-25/IGKV1D-17/LTF/LCN2/POU2AF1/IL1R2/ITGA7/IGHV1-69/IGLC2/PCOLCE2/MZB1/IGHM/IGHV3-7/IGLV3-10/IGHA1/IGKV4-1/IGKC/JCHAIN/IGHV4-61/VNN1/IGKV3-20/SCRG1/IGHV3-33/PTX3/IGKV1D-13/IGLV2-14/IGKV1D-39/TNFRSF17/ANXA3/GRB14/SERPINE2/IGHV3-23	covid
TAKEDA_TARGETS_OF_NUP98_HOXA9_FUSION_10D_DN	TAKEDA_TARGETS_OF_NUP98_HOXA9_FUSION_10D_DN	48	0.440727	1.94149	0.000438405	0.00371833	0.00286858	567	tags=48%, list=26%, signal=36%	DEFA1/MMP8/CEACAM6/CHIT1/CEACAM8/DEFA4/MAOA/BPI/IL1R2/RNASE1/MMP9/DACH1/MEIKIN/TACSTD2/TCN1/C1QC/ANXA3/TMTC1/SLPI/EMP1/IL1R1/CLEC5A/CEBPE	covid
CHICAS_RB1_TARGETS_GROWING	CHICAS_RB1_TARGETS_GROWING	47	0.4389	1.93223	0.000450874	0.00378391	0.00291917	559	tags=51%, list=26%, signal=39%	ADAMTS2/CDC20/GINS2/RAD51AP1/NEK2/KIF20A/TTK/BUB1/FOXM1/BUB1B/CENPA/PTX3/CDCA8/ANXA3/GTSE1/DEPDC1/CORIN/UHRF1/CCNB2/PHGDH/HMMR/CENPF/SCD/TPX2	covid
CROONQUIST_NRAS_VS_STROMAL_STIMULATION_DN	CROONQUIST_NRAS_VS_STROMAL_STIMULATION_DN	31	0.502784	1.99932	0.000451645	0.00378391	0.00291917	870	tags=81%, list=40%, signal=49%	KIF2C/CDC6/CDK1/CDC20/RAD51AP1/CDC45/AURKB/CCNF/FOXM1/CENPA/RECQL4/TK1/CCNB2/UBE2C/TPX2/MKI67/DLGAP5/BCL6/TROAP/SPARC/TSC22D3/CCNB1/CCNA2/BASP1/PTTG1	covid
BURTON_ADIPOGENESIS_PEAK_AT_24HR	BURTON_ADIPOGENESIS_PEAK_AT_24HR	18	0.60131	2.07576	0.000483635	0.00402736	0.00310699	870	tags=100%, list=40%, signal=60%	LCN2/CDK1/CDC20/AURKB/KIF20A/BUB1/SLPI/TK1/ANLN/UBE2C/HMMR/S100A8/MELK/TOP2A/CCNB1/CCNA2/PRC1/PTTG1	covid
JAEGER_METASTASIS_UP	JAEGER_METASTASIS_UP	14	0.642348	2.05728	0.0004903	0.00405826	0.00313083	548	tags=79%, list=25%, signal=59%	FN1/KIF2C/SPP1/CDC6/IGHM/RRM2/PLOD2/UCHL1/DTL/GINS4/CENPF	covid
REACTOME_EUKARYOTIC_TRANSLATION_ELONGATION	REACTOME_EUKARYOTIC_TRANSLATION_ELONGATION	10	-0.630769	-2.26242	0.000508787	0.00418607	0.00322943	803	tags=100%, list=37%, signal=63%	RPL3/EEF1A1/RPS6/EEF1B2/RPL13/RPL10/RPS27/RPL9/RPS3A	control
REACTOME_MITOTIC_G2_G2_M_PHASES	REACTOME_MITOTIC_G2_G2_M_PHASES	21	0.565398	2.01544	0.0005504	0.00450149	0.00347276	562	tags=67%, list=26%, signal=50%	PLK1/CDK1/NEK2/FOXM1/CDC25A/E2F1/PKMYT1/MYBL2/GTSE1/CCNB2/HMMR/CENPF/TPX2/PLK4	covid
CHEOK_RESPONSE_TO_HD_MTX_UP	CHEOK_RESPONSE_TO_HD_MTX_UP	13	0.658195	2.05115	0.000553869	0.00450306	0.00347397	340	tags=54%, list=16%, signal=46%	OLFM4/DEFA1/CTSG/DEFA4/MPO/IGHA1/AZU1	covid
ODONNELL_TARGETS_OF_MYC_AND_TFRC_DN	ODONNELL_TARGETS_OF_MYC_AND_TFRC_DN	17	0.608954	2.0726	0.000566202	0.00457625	0.00353044	789	tags=94%, list=37%, signal=60%	BIRC5/CDC6/CDK1/CDC20/AURKB/FOXM1/DEPDC1B/BUB1B/MYBL2/DEPDC1/CENPF/SCD/PLK4/TOP2A/CCNB1/CCNA2	covid
VANTVEER_BREAST_CANCER_ESR1_DN	VANTVEER_BREAST_CANCER_ESR1_DN	30	0.503476	1.99038	0.000599864	0.00480659	0.00370814	499	tags=53%, list=23%, signal=42%	SLC2A5/KIF2C/HJURP/CDC20/TMCC2/TTK/BUB1/CENPA/CDCA8/MYBL2/STEAP3/RAB6B/CCNB2/CEP55/ANLN/PHGDH	covid
KEGG_T_CELL_RECEPTOR_SIGNALING_PATHWAY	KEGG_T_CELL_RECEPTOR_SIGNALING_PATHWAY	19	-0.480634	-2.26435	0.000603541	0.00480659	0.00370814	792	tags=84%, list=37%, signal=54%	CARD11/RASGRP1/PLCG1/ICOS/CD3E/ITK/CD3G/LCK/CD28/ZAP70/CD8A/CD4/CD8B/CD3D/CD247/IFNG	control
KAMIKUBO_MYELOID_CEBPA_NETWORK	KAMIKUBO_MYELOID_CEBPA_NETWORK	12	0.669994	2.04461	0.000605196	0.00480659	0.00370814	233	tags=50%, list=11%, signal=45%	CD177/MMP8/LTF/LCN2/HP/CAMP	covid
WILCOX_RESPONSE_TO_PROGESTERONE_UP	WILCOX_RESPONSE_TO_PROGESTERONE_UP	29	0.507134	1.97944	0.000615766	0.00486243	0.00375122	856	tags=83%, list=40%, signal=51%	SHCBP1/CDC6/HJURP/CDK1/CDC20/KIF20A/RRM2/PBK/TK1/CCNB2/CEP55/HMMR/CENPF/SCD/PCSK6/DLGAP5/HMGB2/TOP2A/TYMS/NCAPG/CCNB1/KLF5/FADS2/PRC1	covid
LIU_VAV3_PROSTATE_CARCINOGENESIS_UP	LIU_VAV3_PROSTATE_CARCINOGENESIS_UP	16	0.607629	2.01879	0.000647161	0.00508114	0.00391995	293	tags=50%, list=14%, signal=44%	FN1/LTF/ARG1/SPP1/IGHM/IGKC/PLOD2/PPARG	covid
JOHNSTONE_PARVB_TARGETS_3_DN	JOHNSTONE_PARVB_TARGETS_3_DN	74	0.390191	1.8634	0.000661285	0.00516253	0.00398274	878	tags=68%, list=41%, signal=41%	SHCBP1/BIRC5/KIF2C/CDC6/CDK1/CDC20/GINS2/RAD51AP1/NEK2/TTK/E2F8/BUB1/DEPDC1B/RRM2/CENPA/ESCO2/PBK/CDCA8/DTL/OIP5/COCH/SPC24/NUF2/SPAG5/UHRF1/FSTL1/TK1/CENPM/ZWINT/ASPH/CENPF/PLK4/ELL2/NCAPH/FKBP5/DLGAP5/SLC7A5/ZC3HAV1L/PFKFB3/MELK/TOP2A/CENPW/TYMS/NCAPG/CCNA2/KIF11/ARHGEF12/PRC1/PTTG1/SOCS3	covid
KAUFFMANN_MELANOMA_RELAPSE_UP	KAUFFMANN_MELANOMA_RELAPSE_UP	15	0.611567	1.98244	0.000691953	0.00534125	0.00412062	427	tags=67%, list=20%, signal=54%	CDC6/GINS2/RAD51AP1/CDC45/RAD51/RRM2/CHEK1/EXO1/ORC6/POLQ	covid
REICHERT_MITOSIS_LIN9_TARGETS	REICHERT_MITOSIS_LIN9_TARGETS	15	0.611729	1.98296	0.000691953	0.00534125	0.00412062	777	tags=93%, list=36%, signal=60%	PLK1/KIF2C/KIF20A/CDCA2/CCNF/CENPA/CEP55/CALD1/HMMR/CENPF/MKI67/HMGB2/TOP2A/CCNB1	covid
WP_TCELL_ANTIGEN_RECEPTOR_TCR_SIGNALING_PATHWAY	WP_TCELL_ANTIGEN_RECEPTOR_TCR_SIGNALING_PATHWAY	19	-0.470283	-2.21559	0.000806497	0.00619065	0.0047759	792	tags=84%, list=37%, signal=54%	CARD11/SKAP1/CCR5/PLCG1/ICOS/CD3E/ITK/CD3G/LCK/CD28/ZAP70/GATA3/CD8A/CD4/CD3D/CD247	control
REACTOME_DNA_REPLICATION	REACTOME_DNA_REPLICATION	17	0.596563	2.03043	0.00085207	0.00650414	0.00501775	491	tags=65%, list=23%, signal=50%	CDT1/CDC6/ORC1/GINS2/MCM10/CDC45/ORC6/E2F1/GINS4/CCNE1/UBE2C	covid
WEST_ADRENOCORTICAL_TUMOR_UP	WEST_ADRENOCORTICAL_TUMOR_UP	46	0.440758	1.92561	0.000874033	0.00663492	0.00511864	803	tags=67%, list=37%, signal=43%	KIF2C/CDK1/NEK2/KIF20A/GGH/BUB1/FOXM1/RRM2/BUB1B/SLC1A3/CDCA3/CDC25A/PBK/ORC6/DTL/CCNE1/CENPM/ZWINT/CENPF/SCD/TPX2/GADD45A/PCSK6/SLC7A5/HMGB2/MELK/TOP2A/SPARC/KIF1B/CCNB1/KIF3C	covid
ANDERSEN_CHOLANGIOCARCINOMA_CLASS2	ANDERSEN_CHOLANGIOCARCINOMA_CLASS2	34	0.479237	1.93894	0.000883419	0.00666933	0.00514519	918	tags=85%, list=43%, signal=50%	OLFM4/CEACAM6/BCL2L15/OLR1/C1orf116/CDC20/SAPCD2/TTK/BUB1/CDCA3/BHLHE41/ANXA3/CCNB2/CEP55/ANLN/UBE2C/BIK/LIPH/TPX2/DLGAP5/TOP2A/S100P/KLF5/KIF11/MYB/QPCT/CD55/PLBD1/GPR160	covid
NAKAMURA_CANCER_MICROENVIRONMENT_DN	NAKAMURA_CANCER_MICROENVIRONMENT_DN	10	0.691238	2.01242	0.000921012	0.00687756	0.00530583	480	tags=80%, list=22%, signal=62%	KIF2C/CDC6/CDC20/TRIP13/CDCA2/BUB1/SPAG5/CCNB2	covid
REACTOME_DNA_REPLICATION_PRE_INITIATION	REACTOME_DNA_REPLICATION_PRE_INITIATION	10	0.691217	2.01236	0.000921012	0.00687756	0.00530583	382	tags=70%, list=18%, signal=58%	CDT1/CDC6/ORC1/MCM10/CDC45/ORC6/E2F1	covid
FURUKAWA_DUSP6_TARGETS_PCI35_DN	FURUKAWA_DUSP6_TARGETS_PCI35_DN	23	0.53949	1.99768	0.000944341	0.00701364	0.00541082	856	tags=87%, list=40%, signal=53%	SHCBP1/KIF2C/HJURP/AURKB/CENPA/PBK/ORC6/DTL/CCNB2/CEP55/CENPF/TPX2/DLGAP5/DYSF/NCAPG/CCNB1/CCNA2/NEDD4L/KIF11/PRC1	covid
MCBRYAN_PUBERTAL_BREAST_3_4WK_UP	MCBRYAN_PUBERTAL_BREAST_3_4WK_UP	34	0.478743	1.93694	0.000958375	0.00707961	0.00546171	1059	tags=94%, list=49%, signal=49%	FN1/LTF/LCN2/SLC2A5/SPP1/CDK1/RAD51AP1/SDC1/IGHA2/TACSTD2/IGFBP2/JCHAIN/EPDR1/CDKN2B/SCD/GADD45A/SIAH2/RNASE2/PEAR1/GMPR/CEACAM1/CLU/FADS2/MYB/BASP1/CD55/ADM/ETS2/ABCC3/PADI2/HK1/GSN	covid
LEE_BMP2_TARGETS_DN	LEE_BMP2_TARGETS_DN	61	0.419946	1.93658	0.000984575	0.00723426	0.00558102	827	tags=66%, list=38%, signal=42%	ADAMTS2/CDT1/CDC6/DAAM2/MCM10/RAD51AP1/CDC45/TRIP13/TTK/E2F8/RAD51/BUB1/RRM2/CHEK1/CDC25A/EXO1/PTX3/ORC6/DTL/BAMBI/TMTC1/CCNE1/UHRF1/PHGDH/ZWINT/IL1R1/CLSPN/PLK4/SERPINE1/FKBP5/S100A8/IRAK3/MELK/NQO2/SLC2A3/CENPW/SRPK1/B4GALT5/PGD/KLF5	covid
TARTE_PLASMA_CELL_VS_PLASMABLAST_DN	TARTE_PLASMA_CELL_VS_PLASMABLAST_DN	45	0.430908	1.87834	0.0010931	0.00798891	0.00616321	789	tags=62%, list=37%, signal=40%	GLDC/KIF2C/CDC6/ORC1/CDK1/CDC20/NEK2/TRIP13/TTK/GGH/CCNF/FOXM1/RRM2/CENPA/CCNE1/UBE2C/HMMR/PLK4/HPGD/MKI67/DLGAP5/SLC7A5/TROAP/HMGB2/TOP2A/TYMS/CCNB1/CCNA2	covid
WP_RETINOBLASTOMA_GENE_IN_CANCER	WP_RETINOBLASTOMA_GENE_IN_CANCER	22	0.546242	1.98893	0.00110861	0.00805939	0.00621758	789	tags=82%, list=37%, signal=52%	CDT1/ORC1/CDK1/CDC45/TTK/RRM2/CHEK1/CDC25A/E2F1/CCNE1/CCNB2/ANLN/PLK4/HMGB2/TOP2A/TYMS/CCNB1/CCNA2	covid
REACTOME_METABOLISM_OF_RNA	REACTOME_METABOLISM_OF_RNA	13	-0.530637	-2.11484	0.0011309	0.00817819	0.00630923	803	tags=92%, list=37%, signal=58%	RPL34/RPL3/RPS6/RPL13/RPL10/RPS27/TSEN54/RPL9/RPS3A/TRMT61A/TSEN2/ADAT2	control
REACTOME_INTERLEUKIN_4_AND_INTERLEUKIN_13_SIGNALING	REACTOME_INTERLEUKIN_4_AND_INTERLEUKIN_13_SIGNALING	22	0.54525	1.98531	0.00116499	0.00838062	0.0064654	167	tags=32%, list=8%, signal=30%	IGHG4/IGHG1/FN1/MAOA/BIRC5/LCN2/MMP9	covid
YANG_BCL3_TARGETS_UP	YANG_BCL3_TARGETS_UP	56	0.407426	1.84927	0.00117158	0.00838413	0.00646811	789	tags=62%, list=37%, signal=41%	OLR1/KIF2C/CDK1/CDC20/HP/RAD51AP1/SDC1/AURKB/SAPCD2/KIF20A/CDCA2/TACSTD2/BUB1/FOXM1/RRM2/CDCA3/PBK/TNFRSF17/E2F1/CCNB2/CA4/UBE2C/SCD/PLK4/MYL9/SERPINE1/ANK1/MKI67/DLGAP5/HMGB2/TOP2A/UBE2T/SLC2A3/CCNB1/CCNA2	covid
MEISSNER_BRAIN_HCP_WITH_H3K4ME3_AND_H3K27ME3	MEISSNER_BRAIN_HCP_WITH_H3K4ME3_AND_H3K27ME3	103	0.347841	1.74712	0.00119219	0.00848738	0.00654776	543	tags=41%, list=25%, signal=32%	FN1/ADAMTS2/GLDC/FHDC1/KCNH2/ITGA7/HJURP/CDK1/SDC1/ITGA9/SAPCD2/TTK/VSIG10/GALNT14/TACSTD2/E2F8/KLHL14/KCNH3/CD24/BUB1/IGFBP2/DEPDC1B/RRM2/SLC1A3/PLOD2/CRACR2B/FZD5/DTL/SERPINE2/MYBL2/COCH/CORIN/ANKRD33B/UHRF1/CA4/ANLN/UBE2C/ALPL/CLSPN/BIK/CDKN2B/HTRA1	covid
TOYOTA_TARGETS_OF_MIR34B_AND_MIR34C	TOYOTA_TARGETS_OF_MIR34B_AND_MIR34C	55	0.409267	1.85363	0.00123349	0.00873617	0.00673969	562	tags=45%, list=26%, signal=34%	SHCBP1/PLK1/RAP1GAP/KIF2C/DENND5B/AURKB/NEK2/TRIP13/CDCA2/RAD51/CCNF/FOXM1/RRM2/BUB1B/CENPA/CDC25A/DTL/PKMYT1/MYBL2/GTSE1/SPC24/PHGDH/CLSPN/CENPF/PLK4	covid
REACTOME_MITOTIC_G1_PHASE_AND_G1_S_TRANSITION	REACTOME_MITOTIC_G1_PHASE_AND_G1_S_TRANSITION	24	0.514156	1.92477	0.00126976	0.00894692	0.00690228	540	tags=58%, list=25%, signal=44%	CDT1/CDC6/ORC1/CDK1/MCM10/CDC45/RRM2/CDC25A/ORC6/E2F1/MYBL2/CCNE1/TK1/CDKN2B	covid
VALK_AML_WITH_CEBPA	VALK_AML_WITH_CEBPA	14	0.611927	1.95985	0.00129275	0.00906243	0.00699139	233	tags=50%, list=11%, signal=45%	MMP8/CEACAM8/LTF/LCN2/PGLYRP1/IGHM/CAMP	covid
BIDUS_METASTASIS_UP	BIDUS_METASTASIS_UP	32	0.483041	1.93689	0.00133368	0.0092575	0.00714188	789	tags=72%, list=37%, signal=46%	BIRC5/CDC6/CDK1/MCM10/BUB1/RRM2/CENPA/PLOD2/CHEK1/PBK/DEPDC1/CCNB2/UBE2C/HMGB3/CENPF/TPX2/PLK4/NCAPH/DLGAP5/TYMS/KIF1B/CCNB1/CCNA2	covid
SHEPARD_BMYB_TARGETS	SHEPARD_BMYB_TARGETS	21	0.542026	1.93213	0.00133405	0.0092575	0.00714188	856	tags=86%, list=40%, signal=52%	BIRC5/CDK1/CDC20/AURKB/TTK/CDCA2/FOXM1/CDCA3/GTSE1/TK1/ANLN/TPX2/MKI67/DLGAP5/MELK/CCNB1/KIF11/PRC1	covid
LY_AGING_OLD_DN	LY_AGING_OLD_DN	17	0.58218	1.98148	0.00141373	0.0097611	0.0075304	842	tags=94%, list=39%, signal=58%	PLK1/KIF2C/CDC20/CCNF/FOXM1/CENPA/PKMYT1/MYBL2/UBE2C/CENPF/HMGB2/TYMS/CCNB1/CCNA2/UGCG/KIF11	covid
MOLENAAR_TARGETS_OF_CCND1_AND_CDK4_DN	MOLENAAR_TARGETS_OF_CCND1_AND_CDK4_DN	18	0.576889	1.99146	0.00154112	0.0105875	0.00816792	604	tags=72%, list=28%, signal=52%	KIF2C/CDC6/HJURP/CDC45/TRIP13/KIF20A/CDCA2/CDCA8/DTL/CEP55/CENPF/TPX2/NCAPH	covid
NAKAYAMA_SOFT_TISSUE_TUMORS_PCA2_DN	NAKAYAMA_SOFT_TISSUE_TUMORS_PCA2_DN	11	0.654382	1.94481	0.00160523	0.010973	0.00846537	657	tags=91%, list=30%, signal=64%	IGHG1/MAOA/IGLC2/IGHA1/IGKC/PPARG/PTX3/CA4/SLC24A3/SELENBP1	covid
REACTOME_ACTIVATION_OF_ATR_IN_RESPONSE_TO_REPLICATION_STRESS	REACTOME_ACTIVATION_OF_ATR_IN_RESPONSE_TO_REPLICATION_STRESS	10	0.678568	1.97554	0.00164964	0.0112208	0.00865653	336	tags=70%, list=16%, signal=59%	CDC6/ORC1/MCM10/CDC45/CHEK1/CDC25A/ORC6	covid
PID_FOXM1_PATHWAY	PID_FOXM1_PATHWAY	13	0.624961	1.94758	0.00177282	0.0119993	0.00925708	548	tags=77%, list=25%, signal=58%	BIRC5/PLK1/CDK1/AURKB/NEK2/FOXM1/CENPA/CCNE1/CCNB2/CENPF	covid
WP_TCELL_ANTIGEN_RECEPTOR_TCR_PATHWAY_DURING_STAPHYLOCOCCUS_AUREUS_INFECTION	WP_TCELL_ANTIGEN_RECEPTOR_TCR_PATHWAY_DURING_STAPHYLOCOCCUS_AUREUS_INFECTION	12	-0.563172	-2.18179	0.00178414	0.0120167	0.00927052	792	tags=92%, list=37%, signal=58%	CARD11/PLCG1/ICOS/ITK/LCK/CD28/ZAP70/CD8A/CD4/CD3D/IFNG	control
REN_BOUND_BY_E2F	REN_BOUND_BY_E2F	14	0.603365	1.93243	0.0018383	0.0123211	0.00950535	527	tags=71%, list=24%, signal=54%	CDC6/ORC1/CDK1/TTK/RAD51/CENPA/CHEK1/CDC25A/TK1/HMGB3	covid
SENGUPTA_NASOPHARYNGEAL_CARCINOMA_UP	SENGUPTA_NASOPHARYNGEAL_CARCINOMA_UP	48	0.413934	1.82346	0.00187218	0.0124543	0.00960814	859	tags=71%, list=40%, signal=44%	FN1/ADAMTS2/CDK1/RAD51AP1/TTK/PLAU/CCNF/DEPDC1B/RRM2/BUB1B/ESCO2/CHEK1/PBK/DTL/NUF2/UHRF1/CEP55/ANLN/ZWINT/CALD1/LAMC1/CENPF/FKBP5/DLGAP5/HMGB2/MELK/TOP2A/TYMS/NCAPG/SPARC/CCNA2/KIF11/PRC1/CKAP4	covid
PID_AURORA_B_PATHWAY	PID_AURORA_B_PATHWAY	10	0.67525	1.96588	0.00187631	0.0124543	0.00960814	350	tags=70%, list=16%, signal=59%	BIRC5/KIF2C/AURKB/KIF20A/BUB1/CENPA/CDCA8	covid
ONDER_CDH1_TARGETS_1_DN	ONDER_CDH1_TARGETS_1_DN	16	0.583314	1.93801	0.00191147	0.0126187	0.00973495	141	tags=38%, list=7%, signal=35%	CEACAM6/LCN2/C1orf116/IL1R2/CDC6/MCM10	covid
GREENBAUM_E2A_TARGETS_UP	GREENBAUM_E2A_TARGETS_UP	15	0.579474	1.8784	0.00191944	0.0126187	0.00973495	842	tags=93%, list=39%, signal=57%	KIF2C/TTK/BUB1/CCNB2/ANLN/PLK4/MKI67/SLC7A5/TOP2A/CCNB1/CCNA2/CA2/PTGS1/KIF11	covid
PID_E2F_PATHWAY	PID_E2F_PATHWAY	17	0.575457	1.95859	0.00194243	0.012709	0.00980463	476	tags=65%, list=22%, signal=51%	CDC6/ORC1/CDK1/PLAU/RRM2/CDC25A/WASF1/E2F1/MYBL2/CCNE1/TK1	covid
MISSIAGLIA_REGULATED_BY_METHYLATION_DN	MISSIAGLIA_REGULATED_BY_METHYLATION_DN	27	0.507122	1.9481	0.00199078	0.0129322	0.0099768	958	tags=89%, list=44%, signal=50%	CDT1/CDC6/CDK1/CDC45/NEK2/FOXM1/BUB1B/CHEK1/TK1/UBE2C/CENPM/ZWINT/HMGB3/CENPF/NCAPH/MKI67/DLGAP5/HMGB2/TYMS/CCNA2/PRC1/NRGN/GMNN/CDKN3	covid
WU_APOPTOSIS_BY_CDKN1A_VIA_TP53	WU_APOPTOSIS_BY_CDKN1A_VIA_TP53	21	0.533523	1.90182	0.00199536	0.0129322	0.0099768	777	tags=81%, list=36%, signal=52%	CDK1/AURKB/TTK/BUB1/EXO1/PBK/CEP55/ANLN/UBE2C/TPX2/MKI67/DLGAP5/HMGB2/UBE2T/TYMS/NCAPG/CCNB1	covid
CHYLA_CBFA2T3_TARGETS_DN	CHYLA_CBFA2T3_TARGETS_DN	29	0.479175	1.87031	0.00204152	0.0131692	0.0101597	640	tags=62%, list=30%, signal=44%	CD177/MMP8/BCL2L15/LTF/LCN2/FHDC1/TFR2/MMP9/BCAM/CAMP/RECQL4/YPEL4/EPDR1/ELL2/RHD/S100A8/ANK1/EPB42	covid
MORI_LARGE_PRE_BII_LYMPHOCYTE_UP	MORI_LARGE_PRE_BII_LYMPHOCYTE_UP	27	0.505266	1.94097	0.00209839	0.0134728	0.0103939	789	tags=74%, list=37%, signal=48%	HJURP/CDK1/CDC20/TTK/CDCA5/E2F8/RRM2/CENPA/CDCA3/DTL/MYBL2/IGLL1/CCNB2/HMGB3/NCAPH/MKI67/MELK/TOP2A/CCNB1/CCNA2	covid
SCIBETTA_KDM5B_TARGETS_DN	SCIBETTA_KDM5B_TARGETS_DN	15	0.577207	1.87106	0.00214931	0.0137356	0.0105966	777	tags=87%, list=36%, signal=56%	KIF2C/CDK1/TTK/IGFBP2/BUB1B/CDCA3/PBK/OIP5/HMMR/NCAPH/DLGAP5/TOP2A/CCNB1	covid
SU_TESTIS	SU_TESTIS	16	0.578753	1.92285	0.00225078	0.0143175	0.0110455	777	tags=88%, list=36%, signal=56%	KIF2C/CDK1/NEK2/TTK/CAMP/BUB1/BUB1B/OIP5/CLTCL1/CCNB2/HMMR/NCAPH/ABCB6/CCNB1	covid
SHEPARD_BMYB_MORPHOLINO_DN	SHEPARD_BMYB_MORPHOLINO_DN	41	0.428797	1.82441	0.00227816	0.0144249	0.0111284	639	tags=54%, list=30%, signal=38%	BIRC5/SLC2A5/CDC6/CDK1/CDC20/GINS2/AURKB/TTK/CDCA2/CA1/IGFBP2/FOXM1/CDCA3/GTSE1/UHRF1/TK1/ANLN/CENPM/EPDR1/TPX2/MKI67/DLGAP5	covid
NADERI_BREAST_CANCER_PROGNOSIS_UP	NADERI_BREAST_CANCER_PROGNOSIS_UP	15	0.574599	1.8626	0.00237941	0.0149968	0.0115696	482	tags=67%, list=22%, signal=52%	KIF20A/CDCA5/BUB1/ATP2C2/EXO1/CDCA8/MYBL2/SPAG5/UHRF1/CEP55	covid
WP_DNA_IRDAMAGE_AND_CELLULAR_RESPONSE_VIA_ATR	WP_DNA_IRDAMAGE_AND_CELLULAR_RESPONSE_VIA_ATR	12	0.633452	1.9331	0.00242067	0.0151375	0.0116781	514	tags=75%, list=24%, signal=57%	PLK1/CDK1/CDC45/RAD51/FOXM1/CHEK1/EXO1/E2F1/CLSPN	covid
WHITFIELD_CELL_CYCLE_S	WHITFIELD_CELL_CYCLE_S	23	0.516457	1.91239	0.00242376	0.0151375	0.0116781	549	tags=61%, list=25%, signal=46%	RAD51AP1/CDC45/CDCA5/E2F8/RAD51/RRM2/ESCO2/EXO1/PKMYT1/CENPM/ZWINT/CALD1/LIPH/MITF	covid
GEORGES_TARGETS_OF_MIR192_AND_MIR215	GEORGES_TARGETS_OF_MIR192_AND_MIR215	87	0.356014	1.74746	0.00269931	0.0167821	0.0129469	639	tags=47%, list=30%, signal=35%	RAP1GAP/FHDC1/HJURP/ORC1/CDC20/MCM10/PCOLCE2/TRIP13/KIF20A/TTK/FAM111B/E2F8/RAD51/PLAU/BUB1B/CENPA/PPARG/ESCO2/CDC25A/DTL/COCH/POLQ/NUF2/DEPDC1/CCNE1/CEP55/ANLN/IL1R1/EPDR1/CLSPN/HMMR/ASPH/MSRB3/CENPF/SCD/PLK4/ELL2/NCAPH/KIF24/MKI67/DLGAP5	covid
PUJANA_BRCA2_PCC_NETWORK	PUJANA_BRCA2_PCC_NETWORK	68	0.375857	1.77615	0.00275048	0.0170232	0.0131329	870	tags=62%, list=40%, signal=38%	CDT1/KIF2C/CDC6/CDK1/CDC20/RAD51AP1/CDC45/AURKB/TTK/BUB1/CCNF/FOXM1/RRM2/BUB1B/CENPA/CHEK1/E2F1/MYBL2/GTSE1/SPAG5/CCNB2/UBE2C/ZWINT/HMMR/CENPF/TPX2/PLK4/NCAPH/MKI67/DLGAP5/TROAP/HMGB2/MELK/TOP2A/TYMS/CCNB1/SRPK1/CCNA2/KIF11/MYB/SYCP2/PTTG1	covid
REACTOME_TRANSLATION	REACTOME_TRANSLATION	12	-0.545276	-2.11246	0.00298407	0.0183861	0.0141843	803	tags=92%, list=37%, signal=58%	RPL34/RPL3/EEF1A1/RPS6/EEF1B2/RPL13/RPL10/RPS27/RPL9/RPS3A/N6AMT1	control
YU_BAP1_TARGETS	YU_BAP1_TARGETS	10	0.663169	1.93071	0.00301186	0.0184746	0.0142526	308	tags=60%, list=14%, signal=52%	BIRC5/CDC6/CDK1/CDC45/CHEK1/CDC25A	covid
SMID_BREAST_CANCER_LUMINAL_A_DN	SMID_BREAST_CANCER_LUMINAL_A_DN	10	0.662005	1.92731	0.00306248	0.0187016	0.0144277	735	tags=100%, list=34%, signal=66%	CDC20/CDC45/CDCA3/CDCA8/MYBL2/CCNE1/TPX2/NCAPH/SLC7A5/TOP2A	covid
VANTVEER_BREAST_CANCER_METASTASIS_DN	VANTVEER_BREAST_CANCER_METASTASIS_DN	25	0.496056	1.87601	0.00314549	0.0191235	0.0147532	527	tags=56%, list=24%, signal=43%	BIRC5/HJURP/MMP9/TRIP13/GGH/BUB1/CENPA/ORC6/DTL/DEPDC1/RAB6B/TK1/CCNB2/HMGB3	covid
WP_TCELL_RECEPTOR_AND_COSTIMULATORY_SIGNALING	WP_TCELL_RECEPTOR_AND_COSTIMULATORY_SIGNALING	10	-0.56142	-2.01368	0.00323935	0.0196073	0.0151265	754	tags=90%, list=35%, signal=59%	RASGRP1/PLCG1/ITK/LCK/DYRK2/CD28/ZAP70/CD8A/CD8B	control
RODRIGUES_THYROID_CARCINOMA_POORLY_DIFFERENTIATED_UP	RODRIGUES_THYROID_CARCINOMA_POORLY_DIFFERENTIATED_UP	60	0.38606	1.7758	0.00335956	0.0201872	0.0155738	1029	tags=77%, list=48%, signal=41%	SHCBP1/KIF2C/CDC6/CDK1/GINS2/RAD51AP1/DENND5B/TTK/BUB1B/CHEK1/PBK/ORC6/DTL/GTSE1/STEAP3/CCNE1/ANLN/UBE2C/PHGDH/ZWINT/HMGB3/CDKN2B/CENPF/SLC2A1/SCD/MKI67/DLGAP5/ZC3HAV1L/HMGB2/CENPW/TYMS/NCAPG/KIF1B/CCNB1/CCNA2/LAPTM4B/UPP1/PRC1/ERLIN1/MCM2/PNP/PHTF1/AGFG1/CCNE2/ADAM9/DHFR	covid
VANASSE_BCL2_TARGETS_DN	VANASSE_BCL2_TARGETS_DN	12	0.622498	1.89967	0.00336454	0.0201872	0.0155738	193	tags=42%, list=9%, signal=38%	CTSG/FN1/MPO/PGLYRP1/KIF20A	covid
WANG_CISPLATIN_RESPONSE_AND_XPC_UP	WANG_CISPLATIN_RESPONSE_AND_XPC_UP	30	0.460569	1.82076	0.00379562	0.0226747	0.0174929	242	tags=33%, list=11%, signal=30%	CEACAM6/BIRC5/GLDC/CDK1/IGLL5/PYCR1/TRIP13/TTK/RAD51/IGFBP2	covid
GEORGES_CELL_CYCLE_MIR192_TARGETS	GEORGES_CELL_CYCLE_MIR192_TARGETS	11	0.628639	1.86831	0.00385582	0.0229346	0.0176934	632	tags=82%, list=29%, signal=58%	RAP1GAP/MCM10/RAD51/PLAU/DTL/POLQ/EMP1/NCAPH/MKI67	covid
COLINA_TARGETS_OF_4EBP1_AND_4EBP2	COLINA_TARGETS_OF_4EBP1_AND_4EBP2	43	0.421033	1.80559	0.00408424	0.0241885	0.0186607	818	tags=67%, list=38%, signal=43%	C4BPA/BIRC5/LCN2/PLK1/CDT1/KIF2C/CDC20/AURKB/NEK2/KIF20A/TTK/RAD51/IGFBP2/FOXM1/PLOD2/PBK/NUF2/ANLN/HMMR/TPX2/DLGAP5/TGM2/MELK/TOP2A/UBE2T/NQO2/CCNB1/CCNA2/CD59	covid
PID_PLK1_PATHWAY	PID_PLK1_PATHWAY	13	0.588349	1.83348	0.00469351	0.0276776	0.0213524	559	tags=69%, list=26%, signal=52%	PLK1/CDK1/CDC20/KIF20A/BUB1/BUB1B/SPC24/CLSPN/TPX2	covid
LY_AGING_MIDDLE_DN	LY_AGING_MIDDLE_DN	12	0.612692	1.86974	0.00481683	0.0282834	0.0218198	842	tags=100%, list=39%, signal=61%	PLK1/KIF2C/CDC20/CCNF/FOXM1/CENPA/MYBL2/UBE2C/CENPF/CCNB1/CCNA2/KIF11	covid
DARWICHE_PAPILLOMA_RISK_HIGH_DN	DARWICHE_PAPILLOMA_RISK_HIGH_DN	11	0.620028	1.84272	0.00500992	0.029275	0.0225848	445	tags=64%, list=21%, signal=51%	IGHG1/SPP1/CA3/SCN1B/SPC24/NUF2/SPAG5	covid
IVANOVA_HEMATOPOIESIS_LATE_PROGENITOR	IVANOVA_HEMATOPOIESIS_LATE_PROGENITOR	48	0.393109	1.73172	0.00502832	0.029275	0.0225848	1068	tags=79%, list=50%, signal=41%	CTSG/BCL2L15/BIRC5/CDC6/HP/TACSTD2/CA1/RRM2/ESCO2/PBK/ANXA3/IGLL1/NUF2/SLPI/KLF1/TK1/MAP1A/MGAM/HMBS/TROAP/KIF1B/CCNB1/IL1RL1/SLC22A4/BSG/MIR223/GPR160/MCM2/PLIN5/CSGALNACT2/SAP30/BLVRB/UBAP1/ELOVL7/F13A1/PSTPIP2/DRAM1/RAB31	covid
LI_AMPLIFIED_IN_LUNG_CANCER	LI_AMPLIFIED_IN_LUNG_CANCER	27	0.484861	1.86259	0.00508604	0.0294861	0.0227477	309	tags=37%, list=14%, signal=32%	CEACAM6/CHIT1/LTF/LCN2/SPP1/PLAU/CLDN9/IGFBP2/IGKC/UCHL1	covid
ZHANG_BREAST_CANCER_PROGENITORS_UP	ZHANG_BREAST_CANCER_PROGENITORS_UP	39	0.418228	1.75919	0.00512562	0.0295908	0.0228284	789	tags=64%, list=37%, signal=41%	SHCBP1/KIF2C/CDC6/TRIP13/RAD51/CD24/BUB1/RRM2/BUB1B/ESCO2/CHEK1/CDC25A/PBK/CDCA8/DEPDC1/UHRF1/CEP55/ANLN/CENPF/ZC3HAV1L/HMGB2/MELK/TOP2A/NCAPG/CCNA2	covid
SANSOM_APC_MYC_TARGETS	SANSOM_APC_MYC_TARGETS	16	0.546076	1.81429	0.00525437	0.0302071	0.0233039	499	tags=56%, list=23%, signal=44%	SDC1/SAPCD2/FOXM1/SLC1A3/CENPA/ACHE/OPLAH/FZD5/PHGDH	covid
YAMAZAKI_TCEB3_TARGETS_DN	YAMAZAKI_TCEB3_TARGETS_DN	25	0.481863	1.82234	0.00552628	0.031638	0.0244077	467	tags=48%, list=22%, signal=38%	GRB10/SPP1/NEK2/KIF20A/IGFBP2/BUB1B/ESCO2/UCHL1/FZD5/MYBL2/CCNE1/UHRF1	covid
PID_IL12_2PATHWAY	PID_IL12_2PATHWAY	24	-0.349276	-1.75111	0.0056152	0.0320137	0.0246976	771	tags=75%, list=36%, signal=49%	CCR5/CD3E/CD3G/STAT4/LCK/TBX21/GZMB/CD8A/EOMES/CD4/GZMA/CD8B/CD3D/CD247/IL2RB/FASLG/IL12RB2/IFNG	control
GRAHAM_CML_QUIESCENT_VS_NORMAL_QUIESCENT_UP	GRAHAM_CML_QUIESCENT_VS_NORMAL_QUIESCENT_UP	31	0.449939	1.78919	0.00573234	0.0324125	0.0250053	972	tags=81%, list=45%, signal=45%	TFR2/CDK1/CDC20/CA1/RRM2/CHEK1/SERPINE2/ITGA2B/KLF1/TK1/CCNB2/CEP55/ZWINT/SPTA1/CENPF/DLGAP5/MELK/TOP2A/RHAG/CA2/KIF11/PRC1/CDKN3/PRDX2/BLVRB	covid
REACTOME_RHO_GTPASE_EFFECTORS	REACTOME_RHO_GTPASE_EFFECTORS	31	0.449968	1.7893	0.00573234	0.0324125	0.0250053	628	tags=55%, list=29%, signal=39%	BIRC5/PLK1/KIF2C/CDC20/AURKB/BUB1/BUB1B/CENPA/WASF1/CDCA8/SPC24/NUF2/CENPM/ZWINT/CENPF/MYL9/S100A8	covid
REACTOME_CELLULAR_RESPONSE_TO_STARVATION	REACTOME_CELLULAR_RESPONSE_TO_STARVATION	10	-0.531491	-1.90634	0.00597342	0.0336372	0.0259501	803	tags=90%, list=37%, signal=57%	RPL34/RPL3/RPS6/RPL13/RPL10/RPS27/RPL9/RPS3A/C12orf66	control
KRIEG_HYPOXIA_NOT_VIA_KDM3A	KRIEG_HYPOXIA_NOT_VIA_KDM3A	82	0.342027	1.66482	0.00601165	0.0337143	0.0260096	1191	tags=84%, list=55%, signal=39%	BIRC5/CDT1/HJURP/ORC1/SDC1/TRIP13/SMTN/CDCA5/RAD51/BUB1/FOXM1/PLOD2/SLCO4A1/ANXA3/DTL/SERPINE2/PKMYT1/MYBL2/OIP5/UHRF1/TK1/CEP55/HSD3B7/CENPF/MITF/SLC2A1/SCD/ELL2/GADD45A/EPAS1/SMOX/PANX2/SIAH2/SLC7A5/ABCB6/STBD1/NT5DC2/PFKFB3/MELK/TYMS/MXRA7/IRS2/MGLL/CITED4/KIF11/FADS2/PRC1/TGFA/PHC2/SLC26A6/ITGB5/SAP30/UBE2J1/CTNNAL1/DHFR/HK1/DRAM1/NFIL3/GSN/LDHA/DUSP1/ATG9A/NFKBIA/PPP1R3B/TUBB4B/TPM1/ERGIC1/M…	covid
MARTORIATI_MDM4_TARGETS_FETAL_LIVER_DN	MARTORIATI_MDM4_TARGETS_FETAL_LIVER_DN	22	0.497961	1.81313	0.00607677	0.033941	0.0261845	859	tags=82%, list=40%, signal=50%	GRB10/BUB1/FOXM1/FZD5/DTL/SPAG5/ELL2/RHAG/KIF1B/CA2/UGCG/CITED4/KIF11/FADS2/MYB/BASP1/PRC1/CKAP4	covid
LEE_EARLY_T_LYMPHOCYTE_DN	LEE_EARLY_T_LYMPHOCYTE_DN	16	-0.442991	-1.92446	0.00622145	0.0346084	0.0266993	812	tags=81%, list=38%, signal=51%	DENND2D/GPR183/GIMAP1/GIMAP7/SAMD3/CCR7/TRABD2A/TBC1D4/SEMA4C/MAN1C1/NELL2/TNFRSF25/LRRN3	control
ALCALAY_AML_BY_NPM1_LOCALIZATION_DN	ALCALAY_AML_BY_NPM1_LOCALIZATION_DN	56	0.376788	1.7102	0.00632352	0.0350344	0.027028	1035	tags=75%, list=48%, signal=40%	SHCBP1/BIRC5/KIF2C/IL1R2/CDC6/CDC20/MCM10/ITGA9/CCNF/FOXM1/RRM2/CHEK1/EXO1/WASF1/TK1/CCNB2/UBE2C/CENPM/HMMR/TPX2/NCAPH/EGFL7/RHD/ANK1/MKI67/DLGAP5/ITM2C/TYMS/SPARC/CCNB1/CCNA2/PTTG1/REPS2/MCM2/CDKN3/BLVRB/INSL3/STOM/DHFR/SLC1A4/CORO2A/HGF	covid
EPPERT_PROGENITOR	EPPERT_PROGENITOR	20	0.517904	1.83499	0.00678597	0.0374455	0.0288881	630	tags=65%, list=29%, signal=46%	GINS2/TRIP13/CHEK1/WASF1/DTL/BAMBI/STEAP3/CCNB2/ZWINT/SPTA1/SCD/PLK4/ANK1	covid
PUJANA_BREAST_CANCER_LIT_INT_NETWORK	PUJANA_BREAST_CANCER_LIT_INT_NETWORK	14	0.566758	1.81519	0.00685109	0.0376536	0.0290486	514	tags=64%, list=24%, signal=49%	PLK1/CDK1/RAD51/BUB1B/CHEK1/CDC25A/E2F1/CCNE1/CLSPN	covid
VALK_AML_CLUSTER_7	VALK_AML_CLUSTER_7	11	0.609671	1.81193	0.00732796	0.0399669	0.0308333	759	tags=91%, list=35%, signal=59%	RAP1GAP/KCNH2/RHCE/SLC6A9/OSBP2/SLC2A1/ANK1/SELENBP1/SPTB/RHAG	covid
VERNELL_RETINOBLASTOMA_PATHWAY_UP	VERNELL_RETINOBLASTOMA_PATHWAY_UP	14	0.563273	1.80403	0.00733018	0.0399669	0.0308333	733	tags=79%, list=34%, signal=52%	RAD51AP1/CDCA5/RRM2/ESCO2/CDC25A/PTX3/RECQL4/CCNE1/CLSPN/HMGB2/MELK	covid
PUJANA_BREAST_CANCER_WITH_BRCA1_MUTATED_UP	PUJANA_BREAST_CANCER_WITH_BRCA1_MUTATED_UP	12	0.599153	1.82843	0.00754068	0.0408662	0.031527	523	tags=67%, list=24%, signal=51%	CDK1/CDC20/RAD51AP1/AURKB/FOXM1/CENPA/MYBL2/HMMR	covid
IVANOVA_HEMATOPOIESIS_MATURE_CELL	IVANOVA_HEMATOPOIESIS_MATURE_CELL	38	0.421211	1.75314	0.00756324	0.0408662	0.031527	1005	tags=79%, list=47%, signal=43%	MMP8/ABCA13/PGLYRP1/TMCC2/UPB1/CDCA3/SPTA1/GADD45A/RHD/SMOX/LYVE1/SPTB/RNASE2/ANKRD9/ABCB6/IFIT1B/RHAG/ACSL1/LRG1/CCNA2/SLC11A1/PRC1/PLBD1/PPBP/SLC1A5/THBS1/ITGAM/CDKN3/CPEB4/AGFG1	covid
SMIRNOV_RESPONSE_TO_IR_6HR_DN	SMIRNOV_RESPONSE_TO_IR_6HR_DN	24	0.467872	1.75151	0.00758433	0.0408662	0.031527	639	tags=58%, list=30%, signal=41%	PLK1/CDC20/NEK2/KIF20A/BUB1/CENPA/CDCA3/DEPDC1/UBE2C/HMMR/CENPF/SCD/TPX2/DLGAP5	covid
BUYTAERT_PHOTODYNAMIC_THERAPY_STRESS_DN	BUYTAERT_PHOTODYNAMIC_THERAPY_STRESS_DN	63	0.367145	1.70103	0.00761614	0.0408773	0.0315356	790	tags=57%, list=37%, signal=37%	FN1/BIRC5/HJURP/ORC1/CDK1/GINS2/MCM10/AURKB/NEK2/SMTN/KIF20A/GALNT14/TACSTD2/PLAU/BUB1/CCNF/RRM2/CDCA3/EXO1/E2F1/GINS4/CCNE1/CALD1/ITGB3/MYL9/PCSK6/SERPINE1/MKI67/HMBS/TGM2/MANSC1/TOP2A/SPARC/MAPK14/CCNA2/NEDD4L	covid
REACTOME_APC_C_MEDIATED_DEGRADATION_OF_CELL_CYCLE_PROTEINS	REACTOME_APC_C_MEDIATED_DEGRADATION_OF_CELL_CYCLE_PROTEINS	10	0.633466	1.84423	0.007783	0.0416103	0.0321011	268	tags=60%, list=12%, signal=53%	PLK1/CDK1/CDC20/AURKB/NEK2/BUB1B	covid
FARMER_BREAST_CANCER_CLUSTER_2	FARMER_BREAST_CANCER_CLUSTER_2	16	0.53205	1.76769	0.00790434	0.0419327	0.0323498	870	tags=88%, list=40%, signal=53%	NEK2/KIF20A/BUB1/BUB1B/CENPA/CCNB2/CEP55/TPX2/MELK/NCAPG/CCNA2/KIF11/PRC1/PTTG1	covid
KEGG_ECM_RECEPTOR_INTERACTION	KEGG_ECM_RECEPTOR_INTERACTION	16	0.531853	1.76703	0.00790434	0.0419327	0.0323498	564	tags=62%, list=26%, signal=46%	FN1/VWF/SPP1/ITGA7/SDC1/ITGA9/ITGA2B/HMMR/LAMC1/ITGB3	covid
JINESH_BLEBBISHIELD_TRANSFORMED_STEM_CELL_SPHERES_DN	JINESH_BLEBBISHIELD_TRANSFORMED_STEM_CELL_SPHERES_DN	28	-0.338344	-1.82066	0.00835293	0.044142	0.0340543	294	tags=43%, list=14%, signal=37%	ID3/ZNF880/TBC1D32/ZNF549/ACOT2/NUBPL/TRGV5/SNORD3B-1/TMEM191A/ZNF483/ARPIN/ZNF69	control
SONG_TARGETS_OF_IE86_CMV_PROTEIN	SONG_TARGETS_OF_IE86_CMV_PROTEIN	16	0.528193	1.75487	0.00890951	0.0469029	0.0361842	951	tags=94%, list=44%, signal=53%	CDT1/CDK1/FOXM1/E2F1/MYBL2/CCNE1/TK1/ZWINT/TPX2/HMGB2/TYMS/KIF11/PTTG1/MCM2/PNP	covid
TAKEDA_TARGETS_OF_NUP98_HOXA9_FUSION_8D_DN	TAKEDA_TARGETS_OF_NUP98_HOXA9_FUSION_8D_DN	50	0.386439	1.7217	0.0090378	0.0473967	0.0365652	1034	tags=78%, list=48%, signal=42%	DEFA1/CEACAM6/ZDHHC19/CEACAM8/DEFA4/BPI/IL1R2/RNASE1/MMP9/DACH1/C1QC/SLPI/S100A12/EMP1/CLEC5A/HTRA1/CEBPE/EPAS1/FOLR3/BCL6/PYGL/CLU/PADI4/F5/CR1/S100P/PNPLA1/SLC11A1/ADGRG3/HK3/CST7/PLBD1/PPBP/ITGAM/ELOVL7/CREB5/ADAM9/PADI2/CORO2A	covid
MOREAUX_MULTIPLE_MYELOMA_BY_TACI_UP	MOREAUX_MULTIPLE_MYELOMA_BY_TACI_UP	41	0.395558	1.68298	0.00920288	0.0480789	0.0370914	549	tags=44%, list=25%, signal=33%	OLAH/CEACAM6/ARG1/BEX1/GRB10/KCNH2/SAMD14/RNASE1/IGKC/ATP2C2/TNFRSF13B/LINC01136/SCRG1/S100A12/ITGA2B/ALPL/BIK/MITF	covid
WP_DNA_DAMAGE_RESPONSE	WP_DNA_DAMAGE_RESPONSE	10	0.624689	1.81868	0.00951254	0.0493216	0.0380502	574	tags=80%, list=27%, signal=59%	CDK1/RAD51/CHEK1/CDC25A/E2F1/CCNE1/CCNB2/GADD45A	covid
WP_MIRNA_REGULATION_OF_DNA_DAMAGE_RESPONSE	WP_MIRNA_REGULATION_OF_DNA_DAMAGE_RESPONSE	10	0.624689	1.81868	0.00951254	0.0493216	0.0380502	574	tags=80%, list=27%, signal=59%	CDK1/RAD51/CHEK1/CDC25A/E2F1/CCNE1/CCNB2/GADD45A	covid

## Sheet: GSEA reults of GSE52418
ID	Description	setSize	enrichmentScore	NES	pvalue	p.adjust	qvalues	rank	leading_edge	core_enrichment	phenotype
REACTOME_ADAPTIVE_IMMUNE_SYSTEM	REACTOME_ADAPTIVE_IMMUNE_SYSTEM	80	0.57002	2.46378	1e-10	4.12e-09	3.13263e-09	166	tags=56%, list=20%, signal=50%	IGKV3D-20/IGLV3-27/IGLV1-51/IGLV3-25/IGHV4-34/IGKV1-17/IGLV6-57/IGHV2-70/IGLV3-19/IGKV2-30/IGHV4-59/IGLV3-1/IGLV2-23/IGHV1-2/CDC20/IGLV2-11/IGLV1-47/IGLC3/IGLC2/UBE2C/IGHV1-46/KIF4A/KIF20A/IGHV3-33/IGHV3-13/IGHV4-39/IGKV5-2/IGKV1-12/IGKV3-15/IGLV2-14/IGKV1-5/IGLV1-44/IGHV3-23/IGKV4-1/IGHV3-11/IGHV3-30/IGLV1-40/IGHV3-48/TREML1/IGKV1-16/IGLV3-21/IGHV2-5/KIF2C/IGHV1-69/IGKV3-11	covid
REACTOME_ANTIGEN_ACTIVATES_B_CELL_RECEPTOR_BCR_LEADING_TO_GENERATION_OF_SECOND_MESSENGERS	REACTOME_ANTIGEN_ACTIVATES_B_CELL_RECEPTOR_BCR_LEADING_TO_GENERATION_OF_SECOND_MESSENGERS	46	0.743996	2.98442	1e-10	4.12e-09	3.13263e-09	166	tags=85%, list=20%, signal=72%	IGKV3D-20/IGLV3-27/IGLV1-51/IGLV3-25/IGHV4-34/IGKV1-17/IGLV6-57/IGHV2-70/IGLV3-19/IGKV2-30/IGHV4-59/IGLV3-1/IGLV2-23/IGHV1-2/IGLV2-11/IGLV1-47/IGLC3/IGLC2/IGHV1-46/IGHV3-33/IGHV3-13/IGHV4-39/IGKV5-2/IGKV1-12/IGKV3-15/IGLV2-14/IGKV1-5/IGLV1-44/IGHV3-23/IGKV4-1/IGHV3-11/IGHV3-30/IGLV1-40/IGHV3-48/IGKV1-16/IGLV3-21/IGHV2-5/IGHV1-69/IGKV3-11	covid
REACTOME_ANTI_INFLAMMATORY_RESPONSE_FAVOURING_LEISHMANIA_PARASITE_INFECTION	REACTOME_ANTI_INFLAMMATORY_RESPONSE_FAVOURING_LEISHMANIA_PARASITE_INFECTION	60	0.63695	2.64793	1e-10	4.12e-09	3.13263e-09	248	tags=78%, list=29%, signal=60%	IGHG1/IGKV3D-20/IGLV3-27/IGLV1-51/IGLV3-25/IGHV4-34/IGKV1-17/IGLV6-57/IGHV2-70/IGLV3-19/IGKV2-30/IGHV4-59/IGLV3-1/IGLV2-23/IGHV1-2/IGLV2-11/IGLV1-47/IGLC3/IGLC2/IGHV1-46/IGHV3-33/IGHV3-13/IGHV4-39/IGKV5-2/IGKV1-12/IGKV3-15/IGLV2-14/IGKV1-5/IGLV1-44/IGHV3-23/IGKV4-1/IGHV3-11/IGHV3-30/IGLV1-40/IGHV3-48/IGKV1-16/IGLV3-21/IGHV2-5/IGHV1-69/IGKV3-11/IGHG4/IGHV3-7/IGHV3-53/IGKV3-20/IGLV2-8/IGLV7-43/ADM	covid
REACTOME_BINDING_AND_UPTAKE_OF_LIGANDS_BY_SCAVENGER_RECEPTORS	REACTOME_BINDING_AND_UPTAKE_OF_LIGANDS_BY_SCAVENGER_RECEPTORS	54	0.747009	3.06466	1e-10	4.12e-09	3.13263e-09	166	tags=83%, list=20%, signal=72%	HBA2/HBB/IGKV3D-20/IGLV3-27/HBA1/IGLV1-51/IGLV3-25/IGHV4-34/IGKV1-17/IGLV6-57/IGHV2-70/IGLV3-19/IGKV2-30/IGHV4-59/IGLV3-1/IGLV2-23/IGHV1-2/IGLV2-11/IGLV1-47/IGLC3/IGLC2/JCHAIN/IGHV1-46/IGHV3-33/IGHV3-13/IGHA2/IGHV4-39/IGKV5-2/IGKV1-12/IGKV3-15/IGHA1/IGLV2-14/IGKV1-5/IGLV1-44/IGHV3-23/IGKV4-1/IGHV3-11/IGHV3-30/IGLV1-40/IGHV3-48/IGKV1-16/IGLV3-21/IGHV2-5/IGHV1-69/IGKV3-11	covid
REACTOME_CD22_MEDIATED_BCR_REGULATION	REACTOME_CD22_MEDIATED_BCR_REGULATION	45	0.750404	3.00138	1e-10	4.12e-09	3.13263e-09	166	tags=87%, list=20%, signal=74%	IGKV3D-20/IGLV3-27/IGLV1-51/IGLV3-25/IGHV4-34/IGKV1-17/IGLV6-57/IGHV2-70/IGLV3-19/IGKV2-30/IGHV4-59/IGLV3-1/IGLV2-23/IGHV1-2/IGLV2-11/IGLV1-47/IGLC3/IGLC2/IGHV1-46/IGHV3-33/IGHV3-13/IGHV4-39/IGKV5-2/IGKV1-12/IGKV3-15/IGLV2-14/IGKV1-5/IGLV1-44/IGHV3-23/IGKV4-1/IGHV3-11/IGHV3-30/IGLV1-40/IGHV3-48/IGKV1-16/IGLV3-21/IGHV2-5/IGHV1-69/IGKV3-11	covid
REACTOME_CELL_SURFACE_INTERACTIONS_AT_THE_VASCULAR_WALL	REACTOME_CELL_SURFACE_INTERACTIONS_AT_THE_VASCULAR_WALL	64	0.660699	2.7743	1e-10	4.12e-09	3.13263e-09	166	tags=72%, list=20%, signal=63%	SDC1/IGKV3D-20/IGLV3-27/IGLV1-51/IGLV3-25/IGHV4-34/IGKV1-17/IGLV6-57/IGHV2-70/IGLV3-19/IGKV2-30/IGHV4-59/IGLV3-1/IGLV2-23/IGHV1-2/IGLV2-11/IGLV1-47/IGLC3/IGLC2/JCHAIN/IGHV1-46/IGHV3-33/IGHV3-13/IGHA2/IGHV4-39/IGKV5-2/IGKV1-12/IGKV3-15/CAV1/IGHA1/IGLV2-14/IGKV1-5/IGLV1-44/IGHV3-23/IGKV4-1/IGHV3-11/IGHV3-30/IGLV1-40/IGHV3-48/PF4V1/IGKV1-16/IGLV3-21/IGHV2-5/IGHV1-69/FN1/IGKV3-11	covid
REACTOME_COMPLEMENT_CASCADE	REACTOME_COMPLEMENT_CASCADE	53	0.717287	2.94063	1e-10	4.12e-09	3.13263e-09	260	tags=96%, list=31%, signal=71%	IGHG1/IGKV3D-20/IGLV3-27/IGLV1-51/IGLV3-25/IGHV4-34/IGKV1-17/IGLV6-57/IGHV2-70/IGLV3-19/IGKV2-30/IGHV4-59/IGLV3-1/IGLV2-23/IGHV1-2/IGLV2-11/IGLV1-47/IGLC3/IGLC2/C1QC/IGHV1-46/IGHV3-33/IGHV3-13/IGHV4-39/IGKV5-2/IGKV1-12/IGKV3-15/IGLV2-14/IGKV1-5/CLU/IGLV1-44/IGHV3-23/IGKV4-1/IGHV3-11/IGHV3-30/IGLV1-40/IGHV3-48/IGKV1-16/IGLV3-21/IGHV2-5/C1QB/IGHV1-69/IGKV3-11/IGHG4/IGHV3-7/IGHV3-53/IGKV3-20/IGLV2-8…	covid
REACTOME_CREATION_OF_C4_AND_C2_ACTIVATORS	REACTOME_CREATION_OF_C4_AND_C2_ACTIVATORS	50	0.733009	2.97067	1e-10	4.12e-09	3.13263e-09	166	tags=84%, list=20%, signal=72%	IGHG1/IGKV3D-20/IGLV3-27/IGLV1-51/IGLV3-25/IGHV4-34/IGKV1-17/IGLV6-57/IGHV2-70/IGLV3-19/IGKV2-30/IGHV4-59/IGLV3-1/IGLV2-23/IGHV1-2/IGLV2-11/IGLV1-47/IGLC3/IGLC2/C1QC/IGHV1-46/IGHV3-33/IGHV3-13/IGHV4-39/IGKV5-2/IGKV1-12/IGKV3-15/IGLV2-14/IGKV1-5/IGLV1-44/IGHV3-23/IGKV4-1/IGHV3-11/IGHV3-30/IGLV1-40/IGHV3-48/IGKV1-16/IGLV3-21/IGHV2-5/C1QB/IGHV1-69/IGKV3-11	covid
REACTOME_FCERI_MEDIATED_CA_2_MOBILIZATION	REACTOME_FCERI_MEDIATED_CA_2_MOBILIZATION	44	0.760055	3.0377	1e-10	4.12e-09	3.13263e-09	166	tags=89%, list=20%, signal=75%	IGKV3D-20/IGLV3-27/IGLV1-51/IGLV3-25/IGHV4-34/IGKV1-17/IGLV6-57/IGHV2-70/IGLV3-19/IGKV2-30/IGHV4-59/IGLV3-1/IGLV2-23/IGHV1-2/IGLV2-11/IGLV1-47/IGLC3/IGLC2/IGHV1-46/IGHV3-33/IGHV3-13/IGHV4-39/IGKV5-2/IGKV1-12/IGKV3-15/IGLV2-14/IGKV1-5/IGLV1-44/IGHV3-23/IGKV4-1/IGHV3-11/IGHV3-30/IGLV1-40/IGHV3-48/IGKV1-16/IGLV3-21/IGHV2-5/IGHV1-69/IGKV3-11	covid
REACTOME_FCERI_MEDIATED_MAPK_ACTIVATION	REACTOME_FCERI_MEDIATED_MAPK_ACTIVATION	44	0.760055	3.0377	1e-10	4.12e-09	3.13263e-09	166	tags=89%, list=20%, signal=75%	IGKV3D-20/IGLV3-27/IGLV1-51/IGLV3-25/IGHV4-34/IGKV1-17/IGLV6-57/IGHV2-70/IGLV3-19/IGKV2-30/IGHV4-59/IGLV3-1/IGLV2-23/IGHV1-2/IGLV2-11/IGLV1-47/IGLC3/IGLC2/IGHV1-46/IGHV3-33/IGHV3-13/IGHV4-39/IGKV5-2/IGKV1-12/IGKV3-15/IGLV2-14/IGKV1-5/IGLV1-44/IGHV3-23/IGKV4-1/IGHV3-11/IGHV3-30/IGLV1-40/IGHV3-48/IGKV1-16/IGLV3-21/IGHV2-5/IGHV1-69/IGKV3-11	covid
REACTOME_FCERI_MEDIATED_NF_KB_ACTIVATION	REACTOME_FCERI_MEDIATED_NF_KB_ACTIVATION	44	0.760055	3.0377	1e-10	4.12e-09	3.13263e-09	166	tags=89%, list=20%, signal=75%	IGKV3D-20/IGLV3-27/IGLV1-51/IGLV3-25/IGHV4-34/IGKV1-17/IGLV6-57/IGHV2-70/IGLV3-19/IGKV2-30/IGHV4-59/IGLV3-1/IGLV2-23/IGHV1-2/IGLV2-11/IGLV1-47/IGLC3/IGLC2/IGHV1-46/IGHV3-33/IGHV3-13/IGHV4-39/IGKV5-2/IGKV1-12/IGKV3-15/IGLV2-14/IGKV1-5/IGLV1-44/IGHV3-23/IGKV4-1/IGHV3-11/IGHV3-30/IGLV1-40/IGHV3-48/IGKV1-16/IGLV3-21/IGHV2-5/IGHV1-69/IGKV3-11	covid
REACTOME_FCGAMMA_RECEPTOR_FCGR_DEPENDENT_PHAGOCYTOSIS	REACTOME_FCGAMMA_RECEPTOR_FCGR_DEPENDENT_PHAGOCYTOSIS	50	0.713129	2.8901	1e-10	4.12e-09	3.13263e-09	231	tags=90%, list=27%, signal=70%	IGHG1/IGKV3D-20/IGLV3-27/IGLV1-51/IGLV3-25/IGHV4-34/IGKV1-17/IGLV6-57/IGHV2-70/IGLV3-19/IGKV2-30/IGHV4-59/IGLV3-1/IGLV2-23/IGHV1-2/IGLV2-11/IGLV1-47/IGLC3/IGLC2/IGHV1-46/IGHV3-33/IGHV3-13/IGHV4-39/IGKV5-2/IGKV1-12/IGKV3-15/IGLV2-14/IGKV1-5/IGLV1-44/IGHV3-23/IGKV4-1/IGHV3-11/IGHV3-30/IGLV1-40/IGHV3-48/IGKV1-16/IGLV3-21/IGHV2-5/IGHV1-69/IGKV3-11/IGHG4/IGHV3-7/IGHV3-53/IGKV3-20/IGLV2-8	covid
REACTOME_FCGR3A_MEDIATED_IL10_SYNTHESIS	REACTOME_FCGR3A_MEDIATED_IL10_SYNTHESIS	50	0.711726	2.88442	1e-10	4.12e-09	3.13263e-09	231	tags=90%, list=27%, signal=70%	IGHG1/IGKV3D-20/IGLV3-27/IGLV1-51/IGLV3-25/IGHV4-34/IGKV1-17/IGLV6-57/IGHV2-70/IGLV3-19/IGKV2-30/IGHV4-59/IGLV3-1/IGLV2-23/IGHV1-2/IGLV2-11/IGLV1-47/IGLC3/IGLC2/IGHV1-46/IGHV3-33/IGHV3-13/IGHV4-39/IGKV5-2/IGKV1-12/IGKV3-15/IGLV2-14/IGKV1-5/IGLV1-44/IGHV3-23/IGKV4-1/IGHV3-11/IGHV3-30/IGLV1-40/IGHV3-48/IGKV1-16/IGLV3-21/IGHV2-5/IGHV1-69/IGKV3-11/IGHG4/IGHV3-7/IGHV3-53/IGKV3-20/IGLV2-8	covid
REACTOME_FCGR_ACTIVATION	REACTOME_FCGR_ACTIVATION	48	0.729947	2.94329	1e-10	4.12e-09	3.13263e-09	231	tags=94%, list=27%, signal=72%	IGHG1/IGKV3D-20/IGLV3-27/IGLV1-51/IGLV3-25/IGHV4-34/IGKV1-17/IGLV6-57/IGHV2-70/IGLV3-19/IGKV2-30/IGHV4-59/IGLV3-1/IGLV2-23/IGHV1-2/IGLV2-11/IGLV1-47/IGLC3/IGLC2/IGHV1-46/IGHV3-33/IGHV3-13/IGHV4-39/IGKV5-2/IGKV1-12/IGKV3-15/IGLV2-14/IGKV1-5/IGLV1-44/IGHV3-23/IGKV4-1/IGHV3-11/IGHV3-30/IGLV1-40/IGHV3-48/IGKV1-16/IGLV3-21/IGHV2-5/IGHV1-69/IGKV3-11/IGHG4/IGHV3-7/IGHV3-53/IGKV3-20/IGLV2-8	covid
REACTOME_FC_EPSILON_RECEPTOR_FCERI_SIGNALING	REACTOME_FC_EPSILON_RECEPTOR_FCERI_SIGNALING	44	0.760055	3.0377	1e-10	4.12e-09	3.13263e-09	166	tags=89%, list=20%, signal=75%	IGKV3D-20/IGLV3-27/IGLV1-51/IGLV3-25/IGHV4-34/IGKV1-17/IGLV6-57/IGHV2-70/IGLV3-19/IGKV2-30/IGHV4-59/IGLV3-1/IGLV2-23/IGHV1-2/IGLV2-11/IGLV1-47/IGLC3/IGLC2/IGHV1-46/IGHV3-33/IGHV3-13/IGHV4-39/IGKV5-2/IGKV1-12/IGKV3-15/IGLV2-14/IGKV1-5/IGLV1-44/IGHV3-23/IGKV4-1/IGHV3-11/IGHV3-30/IGLV1-40/IGHV3-48/IGKV1-16/IGLV3-21/IGHV2-5/IGHV1-69/IGKV3-11	covid
REACTOME_HEMOSTASIS	REACTOME_HEMOSTASIS	116	0.529825	2.37643	1e-10	4.12e-09	3.13263e-09	252	tags=63%, list=30%, signal=51%	SDC1/HBB/IGKV3D-20/IGLV3-27/IGLV1-51/IGLV3-25/IGHV4-34/IGKV1-17/IGLV6-57/IGHV2-70/IGLV3-19/IGKV2-30/IGHV4-59/IGLV3-1/IGLV2-23/IGHV1-2/IGLV2-11/IGLV1-47/IGLC3/IGLC2/JCHAIN/IGHV1-46/KIF4A/KIF20A/IGHV3-33/IGHV3-13/IGHA2/IGHV4-39/IGKV5-2/IGKV1-12/IGKV3-15/CAV1/IGHA1/IGLV2-14/IGKV1-5/CLU/IGLV1-44/IGHV3-23/ITGA2B/IGKV4-1/IGHV3-11/IGHV3-30/IGLV1-40/IGHV3-48/PF4V1/KIF18B/IGKV1-16/IGLV3-21/IGHV2-5/KIF2C/I…	covid
REACTOME_IMMUNOREGULATORY_INTERACTIONS_BETWEEN_A_LYMPHOID_AND_A_NON_LYMPHOID_CELL	REACTOME_IMMUNOREGULATORY_INTERACTIONS_BETWEEN_A_LYMPHOID_AND_A_NON_LYMPHOID_CELL	54	0.679778	2.78884	1e-10	4.12e-09	3.13263e-09	166	tags=74%, list=20%, signal=64%	IGKV3D-20/IGLV3-27/IGLV1-51/IGLV3-25/IGHV4-34/IGKV1-17/IGLV6-57/IGHV2-70/IGLV3-19/IGKV2-30/IGHV4-59/IGLV3-1/IGLV2-23/IGHV1-2/IGLV2-11/IGLV1-47/IGLC3/IGLC2/IGHV1-46/IGHV3-33/IGHV3-13/IGHV4-39/IGKV5-2/IGKV1-12/IGKV3-15/IGLV2-14/IGKV1-5/IGLV1-44/IGHV3-23/IGKV4-1/IGHV3-11/IGHV3-30/IGLV1-40/IGHV3-48/TREML1/IGKV1-16/IGLV3-21/IGHV2-5/IGHV1-69/IGKV3-11	covid
REACTOME_INITIAL_TRIGGERING_OF_COMPLEMENT	REACTOME_INITIAL_TRIGGERING_OF_COMPLEMENT	50	0.733009	2.97067	1e-10	4.12e-09	3.13263e-09	166	tags=84%, list=20%, signal=72%	IGHG1/IGKV3D-20/IGLV3-27/IGLV1-51/IGLV3-25/IGHV4-34/IGKV1-17/IGLV6-57/IGHV2-70/IGLV3-19/IGKV2-30/IGHV4-59/IGLV3-1/IGLV2-23/IGHV1-2/IGLV2-11/IGLV1-47/IGLC3/IGLC2/C1QC/IGHV1-46/IGHV3-33/IGHV3-13/IGHV4-39/IGKV5-2/IGKV1-12/IGKV3-15/IGLV2-14/IGKV1-5/IGLV1-44/IGHV3-23/IGKV4-1/IGHV3-11/IGHV3-30/IGLV1-40/IGHV3-48/IGKV1-16/IGLV3-21/IGHV2-5/C1QB/IGHV1-69/IGKV3-11	covid
REACTOME_LEISHMANIA_INFECTION	REACTOME_LEISHMANIA_INFECTION	63	0.616708	2.58415	1e-10	4.12e-09	3.13263e-09	166	tags=63%, list=20%, signal=55%	IGHG1/IGKV3D-20/IGLV3-27/IGLV1-51/IGLV3-25/IGHV4-34/IGKV1-17/IGLV6-57/IGHV2-70/IGLV3-19/IGKV2-30/IGHV4-59/IGLV3-1/IGLV2-23/IGHV1-2/IGLV2-11/IGLV1-47/IGLC3/IGLC2/IGHV1-46/IGHV3-33/IGHV3-13/IGHV4-39/IGKV5-2/IGKV1-12/IGKV3-15/IGLV2-14/IGKV1-5/IGLV1-44/IGHV3-23/IGKV4-1/IGHV3-11/IGHV3-30/IGLV1-40/IGHV3-48/IGKV1-16/IGLV3-21/IGHV2-5/IGHV1-69/IGKV3-11	covid
REACTOME_PARASITE_INFECTION	REACTOME_PARASITE_INFECTION	49	0.722398	2.92673	1e-10	4.12e-09	3.13263e-09	231	tags=92%, list=27%, signal=71%	IGHG1/IGKV3D-20/IGLV3-27/IGLV1-51/IGLV3-25/IGHV4-34/IGKV1-17/IGLV6-57/IGHV2-70/IGLV3-19/IGKV2-30/IGHV4-59/IGLV3-1/IGLV2-23/IGHV1-2/IGLV2-11/IGLV1-47/IGLC3/IGLC2/IGHV1-46/IGHV3-33/IGHV3-13/IGHV4-39/IGKV5-2/IGKV1-12/IGKV3-15/IGLV2-14/IGKV1-5/IGLV1-44/IGHV3-23/IGKV4-1/IGHV3-11/IGHV3-30/IGLV1-40/IGHV3-48/IGKV1-16/IGLV3-21/IGHV2-5/IGHV1-69/IGKV3-11/IGHG4/IGHV3-7/IGHV3-53/IGKV3-20/IGLV2-8	covid
REACTOME_ROLE_OF_LAT2_NTAL_LAB_ON_CALCIUM_MOBILIZATION	REACTOME_ROLE_OF_LAT2_NTAL_LAB_ON_CALCIUM_MOBILIZATION	44	0.760055	3.0377	1e-10	4.12e-09	3.13263e-09	166	tags=89%, list=20%, signal=75%	IGKV3D-20/IGLV3-27/IGLV1-51/IGLV3-25/IGHV4-34/IGKV1-17/IGLV6-57/IGHV2-70/IGLV3-19/IGKV2-30/IGHV4-59/IGLV3-1/IGLV2-23/IGHV1-2/IGLV2-11/IGLV1-47/IGLC3/IGLC2/IGHV1-46/IGHV3-33/IGHV3-13/IGHV4-39/IGKV5-2/IGKV1-12/IGKV3-15/IGLV2-14/IGKV1-5/IGLV1-44/IGHV3-23/IGKV4-1/IGHV3-11/IGHV3-30/IGLV1-40/IGHV3-48/IGKV1-16/IGLV3-21/IGHV2-5/IGHV1-69/IGKV3-11	covid
REACTOME_ROLE_OF_PHOSPHOLIPIDS_IN_PHAGOCYTOSIS	REACTOME_ROLE_OF_PHOSPHOLIPIDS_IN_PHAGOCYTOSIS	48	0.729947	2.94329	1e-10	4.12e-09	3.13263e-09	231	tags=94%, list=27%, signal=72%	IGHG1/IGKV3D-20/IGLV3-27/IGLV1-51/IGLV3-25/IGHV4-34/IGKV1-17/IGLV6-57/IGHV2-70/IGLV3-19/IGKV2-30/IGHV4-59/IGLV3-1/IGLV2-23/IGHV1-2/IGLV2-11/IGLV1-47/IGLC3/IGLC2/IGHV1-46/IGHV3-33/IGHV3-13/IGHV4-39/IGKV5-2/IGKV1-12/IGKV3-15/IGLV2-14/IGKV1-5/IGLV1-44/IGHV3-23/IGKV4-1/IGHV3-11/IGHV3-30/IGLV1-40/IGHV3-48/IGKV1-16/IGLV3-21/IGHV2-5/IGHV1-69/IGKV3-11/IGHG4/IGHV3-7/IGHV3-53/IGKV3-20/IGLV2-8	covid
REACTOME_SCAVENGING_OF_HEME_FROM_PLASMA	REACTOME_SCAVENGING_OF_HEME_FROM_PLASMA	51	0.771229	3.13802	1e-10	4.12e-09	3.13263e-09	166	tags=88%, list=20%, signal=75%	HBA2/HBB/IGKV3D-20/IGLV3-27/HBA1/IGLV1-51/IGLV3-25/IGHV4-34/IGKV1-17/IGLV6-57/IGHV2-70/IGLV3-19/IGKV2-30/IGHV4-59/IGLV3-1/IGLV2-23/IGHV1-2/IGLV2-11/IGLV1-47/IGLC3/IGLC2/JCHAIN/IGHV1-46/IGHV3-33/IGHV3-13/IGHA2/IGHV4-39/IGKV5-2/IGKV1-12/IGKV3-15/IGHA1/IGLV2-14/IGKV1-5/IGLV1-44/IGHV3-23/IGKV4-1/IGHV3-11/IGHV3-30/IGLV1-40/IGHV3-48/IGKV1-16/IGLV3-21/IGHV2-5/IGHV1-69/IGKV3-11	covid
REACTOME_SIGNALING_BY_THE_B_CELL_RECEPTOR_BCR	REACTOME_SIGNALING_BY_THE_B_CELL_RECEPTOR_BCR	46	0.743996	2.98442	1e-10	4.12e-09	3.13263e-09	166	tags=85%, list=20%, signal=72%	IGKV3D-20/IGLV3-27/IGLV1-51/IGLV3-25/IGHV4-34/IGKV1-17/IGLV6-57/IGHV2-70/IGLV3-19/IGKV2-30/IGHV4-59/IGLV3-1/IGLV2-23/IGHV1-2/IGLV2-11/IGLV1-47/IGLC3/IGLC2/IGHV1-46/IGHV3-33/IGHV3-13/IGHV4-39/IGKV5-2/IGKV1-12/IGKV3-15/IGLV2-14/IGKV1-5/IGLV1-44/IGHV3-23/IGKV4-1/IGHV3-11/IGHV3-30/IGLV1-40/IGHV3-48/IGKV1-16/IGLV3-21/IGHV2-5/IGHV1-69/IGKV3-11	covid
REACTOME_VESICLE_MEDIATED_TRANSPORT	REACTOME_VESICLE_MEDIATED_TRANSPORT	76	0.665041	2.85319	1e-10	4.12e-09	3.13263e-09	246	tags=80%, list=29%, signal=63%	HBA2/HBB/IGKV3D-20/IGLV3-27/HBA1/IGLV1-51/IGLV3-25/IGHV4-34/IGKV1-17/IGLV6-57/IGHV2-70/IGLV3-19/IGKV2-30/IGHV4-59/IGLV3-1/IGLV2-23/IGHV1-2/IGLV2-11/IGLV1-47/IGLC3/IGLC2/JCHAIN/IGHV1-46/KIF4A/KIF20A/IGHV3-33/IGHV3-13/IGHA2/IGHV4-39/IGKV5-2/IGKV1-12/IGKV3-15/IGHA1/IGLV2-14/IGKV1-5/IGLV1-44/IGHV3-23/IGKV4-1/IGHV3-11/IGHV3-30/IGLV1-40/IGHV3-48/SPTB/KIF18B/IGKV1-16/IGLV3-21/IGHV2-5/KIF2C/IGHV1-69/IGKV…	covid
REACTOME_INNATE_IMMUNE_SYSTEM	REACTOME_INNATE_IMMUNE_SYSTEM	96	0.523182	2.29946	2.87178e-10	1.13766e-08	8.65021e-09	252	tags=61%, list=30%, signal=49%	IGHG1/HBB/IGKV3D-20/IGLV3-27/IGLV1-51/IGLV3-25/IGHV4-34/IGKV1-17/IGLV6-57/IGHV2-70/IGLV3-19/IGKV2-30/IGHV4-59/IGLV3-1/IGLV2-23/IGHV1-2/IGLV2-11/IGLV1-47/IGLC3/IGLC2/C1QC/IGHV1-46/IGHV3-33/IGHV3-13/IGHV4-39/IGKV5-2/IGKV1-12/IGKV3-15/IGLV2-14/IGKV1-5/CLU/IGLV1-44/IGHV3-23/IGKV4-1/IGHV3-11/IGHV3-30/IGLV1-40/IGHV3-48/IGKV1-16/IGLV3-21/IGHV2-5/C1QB/IGHV1-69/IGKV3-11/RNASE3/LCN2/IGHG4/IGHV3-7/TXNDC5/RE…	covid
FLORIO_NEOCORTEX_BASAL_RADIAL_GLIA_DN	FLORIO_NEOCORTEX_BASAL_RADIAL_GLIA_DN	85	0.540591	2.34821	3.00285e-10	1.14553e-08	8.71001e-09	281	tags=71%, list=33%, signal=52%	HBA2/HBA1/PLK1/BIRC5/RRM2/DLGAP5/CDC20/CENPA/UBE2C/KIF4A/KIF20A/MYBL2/CCNB2/TROAP/CDCA2/SKA3/HJURP/AURKB/TK1/SHCBP1/CKAP2L/TOP2A/TPX2/MKI67/DTL/BUB1/MELK/GTSE1/FOXM1/CDC45/SKA1/KIF18B/ASPM/HMMR/KIF2C/CDCA5/ANLN/FN1/DEPDC1B/ESPL1/NEK2/BUB1B/CDKN3/CDK1/KIFC1/EXO1/SPARC/KIF14/ESCO2/TTK/TFPI/KIF15/CDCA3/ZWINT/KIF11/CCNB1/FSTL1/POLQ/CENPF/NUF2	covid
REACTOME_INFECTIOUS_DISEASE	REACTOME_INFECTIOUS_DISEASE	82	0.521332	2.25926	5.87369e-09	2.16068e-07	1.64287e-07	248	tags=62%, list=29%, signal=49%	IGHG1/IGKV3D-20/IGLV3-27/IGLV1-51/IGLV3-25/IGHV4-34/IGKV1-17/IGLV6-57/IGHV2-70/IGLV3-19/IGKV2-30/IGHV4-59/IGLV3-1/IGLV2-23/IGHV1-2/IGLV2-11/IGLV1-47/IGLC3/IGLC2/IGHV1-46/IGHV3-33/IGHV3-13/IGHV4-39/IGKV5-2/IGKV1-12/IGKV3-15/IGLV2-14/IGKV1-5/IGLV1-44/IGHV3-23/IGKV4-1/IGHV3-11/IGHV3-30/IGLV1-40/IGHV3-48/IGKV1-16/IGLV3-21/IGHV2-5/IGHV1-69/IGKV3-11/IGHG4/IGHV3-7/IGHV3-53/H2BC11/H4C8/IGKV3-20/H2BC9/IGL…	covid
SOTIRIOU_BREAST_CANCER_GRADE_1_VS_3_UP	SOTIRIOU_BREAST_CANCER_GRADE_1_VS_3_UP	75	0.523371	2.24154	6.2631e-09	2.22448e-07	1.69138e-07	253	tags=65%, list=30%, signal=50%	PLK1/BIRC5/RRM2/DLGAP5/CCNA2/CDC20/CENPA/UBE2C/MCM10/KIF4A/KIF20A/CEP55/MYBL2/CCNB2/TROAP/HJURP/NCAPG/PKMYT1/AURKB/TOP2A/TPX2/MKI67/BUB1/MELK/GTSE1/FOXM1/TRIP13/CDC45/KIF18B/ASPM/HMMR/KIF2C/ESPL1/NEK2/BUB1B/CDKN3/CDK1/E2F1/KIFC1/EXO1/KIF14/RAD51/TTK/KIF15/CDCA3/ZWINT/KIF11/CCNB1/APOBEC3B	covid
HORIUCHI_WTAP_TARGETS_DN	HORIUCHI_WTAP_TARGETS_DN	73	0.536285	2.28917	2.13678e-08	7.18673e-07	5.46441e-07	184	tags=58%, list=22%, signal=49%	PLK1/BIRC5/RRM2/DLGAP5/CCNA2/CDC20/CENPA/UBE2C/KIF4A/KIF20A/CEP55/MYBL2/CCNB2/TROAP/CDCA2/SKA3/HJURP/NCAPG/AURKB/TK1/CKAP2L/TOP2A/TPX2/MKI67/BUB1/MELK/GTSE1/FOXM1/TRIP13/KIF18B/ASPM/TYMS/SPC24/HMMR/KIF2C/ANLN/ESPL1/NEK2/UHRF1/BUB1B/CDKN3/CDK1	covid
MEBARKI_HCC_PROGENITOR_FZD8CRD_UP	MEBARKI_HCC_PROGENITOR_FZD8CRD_UP	114	0.471443	2.11082	2.163e-08	7.18673e-07	5.46441e-07	249	tags=57%, list=29%, signal=47%	PLK1/BIRC5/RRM2/DLGAP5/CCNA2/CDC20/CENPA/MCM10/KIF4A/KIF20A/CEP55/MYBL2/TROAP/SKA3/H1-5/HJURP/NCAPG/PKMYT1/AURKB/TK1/SHCBP1/CKAP2L/TOP2A/TPX2/MKI67/BUB1/MELK/GTSE1/FOXM1/TRIP13/CDC45/SKA1/SPTB/ASPM/TYMS/CDC6/SPC24/HMMR/KIF2C/CDCA5/ANLN/RAD54L/DEPDC1B/ESPL1/NEK2/GINS2/UHRF1/BUB1B/CDKN3/CDK1/E2F1/KIFC1/EXO1/KIF14/ESCO2/ORC1/RAD51/TTK/KIF15/CDCA3/H3C10/ZWINT/TEDC2/KIF11/CCNB1	covid
NAKAYAMA_SOFT_TISSUE_TUMORS_PCA2_UP	NAKAYAMA_SOFT_TISSUE_TUMORS_PCA2_UP	33	0.633812	2.40574	2.49969e-08	8.04589e-07	6.11767e-07	184	tags=73%, list=22%, signal=59%	BIRC5/RRM2/DLGAP5/CCNA2/CDC20/CENPA/UBE2C/KIF20A/CEP55/CCNB2/HJURP/TOP2A/TPX2/MKI67/BUB1/MELK/GTSE1/ASPM/HMMR/KIF2C/ESPL1/NEK2/CDKN3/CDK1	covid
BLANCO_MELO_BRONCHIAL_EPITHELIAL_CELLS_INFLUENZA_A_DEL_NS1_INFECTION_DN	BLANCO_MELO_BRONCHIAL_EPITHELIAL_CELLS_INFLUENZA_A_DEL_NS1_INFECTION_DN	86	0.495221	2.15347	5.13777e-08	1.60361e-06	1.2193e-06	246	tags=60%, list=29%, signal=48%	PLK1/BIRC5/RRM2/CCNA2/UBE2C/MCM10/KIF4A/KIF20A/CEP55/MYBL2/CCNB2/TROAP/CDCA2/SKA3/HJURP/NCAPG/PKMYT1/AURKB/TK1/SHCBP1/TOP2A/DTL/FOXM1/CDC45/SKA1/KIF18B/CDC6/HMMR/KIF2C/CDCA5/ANLN/RAD54L/DEPDC1B/NEK2/GINS2/UHRF1/BUB1B/CDT1/CDKN3/E2F1/KIFC1/EXO1/CLSPN/KIF14/ORC1/RAD51/TTK/KIF15/CDCA3/ZWINT/TEDC2/KIF11	covid
ROSTY_CERVICAL_CANCER_PROLIFERATION_CLUSTER	ROSTY_CERVICAL_CANCER_PROLIFERATION_CLUSTER	78	0.50677	2.18108	6.51355e-08	1.97322e-06	1.50033e-06	253	tags=63%, list=30%, signal=49%	PLK1/BIRC5/RRM2/DLGAP5/CCNA2/CDC20/CENPA/UBE2C/MCM10/KIF4A/KIF20A/CEP55/MYBL2/CCNB2/HJURP/NCAPG/AURKB/TK1/SHCBP1/TOP2A/TPX2/MKI67/DTL/BUB1/MELK/GTSE1/FOXM1/TRIP13/KIF18B/ASPM/TYMS/CDC6/HMMR/KIF2C/ESPL1/NEK2/BUB1B/CDK1/E2F1/KIFC1/KIF14/TTK/KIF15/GGH/CDCA3/ZWINT/KIF11/CCNB1/APOBEC3B	covid
MARSON_BOUND_BY_E2F4_UNSTIMULATED	MARSON_BOUND_BY_E2F4_UNSTIMULATED	102	0.471657	2.0853	7.36082e-08	2.13631e-06	1.62434e-06	246	tags=57%, list=29%, signal=46%	PLK1/BIRC5/RRM2/DLGAP5/CCNA2/CDC20/CENPA/UBE2C/MCM10/KIF4A/KIF20A/CEP55/MYBL2/CCNB2/CDCA2/SKA3/H1-5/HJURP/AURKB/SHCBP1/CKAP2L/TOP2A/TPX2/DTL/BUB1/MELK/GTSE1/CDC45/SKA1/KIF18B/ASPM/CDC6/SPC24/HMMR/KIF2C/CDCA5/ANLN/RAD54L/DEPDC1B/ESPL1/NEK2/UHRF1/BUB1B/CDT1/CDK1/E2F1/KIFC1/EXO1/CLSPN/ESCO2/ORC1/RAD51/TTK/H2BC9/KIF15/CDCA3/TEDC2/KIF11	covid
KOBAYASHI_EGFR_SIGNALING_24HR_DN	KOBAYASHI_EGFR_SIGNALING_24HR_DN	88	0.491297	2.13375	7.46673e-08	2.13631e-06	1.62434e-06	254	tags=60%, list=30%, signal=47%	PLK1/BIRC5/RRM2/DLGAP5/CCNA2/CDC20/CENPA/UBE2C/MCM10/KIF4A/CEP55/MYBL2/HJURP/NCAPG/PKMYT1/AURKB/TK1/SHCBP1/TOP2A/TPX2/MKI67/DTL/BUB1/MELK/GTSE1/TRIP13/CDC45/KIF18B/ASPM/TYMS/CDC6/HMMR/KIF2C/ESPL1/NEK2/GINS2/BUB1B/CDT1/CDKN3/SLCO4A1/CDK1/E2F1/EXO1/KIF14/ORC1/RAD51/TTK/KIF15/CDCA3/ZWINT/KIF11/CCNB1/TNFRSF12A	covid
GOBERT_OLIGODENDROCYTE_DIFFERENTIATION_UP	GOBERT_OLIGODENDROCYTE_DIFFERENTIATION_UP	128	0.442352	2.00068	1.13885e-07	3.17032e-06	2.41054e-06	222	tags=50%, list=26%, signal=43%	PLK1/BIRC5/RRM2/DLGAP5/CCNA2/CDC20/CENPA/UBE2C/MCM10/KIF4A/KIF20A/CEP55/MYBL2/CCNB2/TROAP/CDCA2/SKA3/HJURP/NCAPG/PKMYT1/AURKB/TK1/SHCBP1/CKAP2L/TOP2A/TPX2/MKI67/DTL/BUB1/MELK/GTSE1/FOXM1/TRIP13/CDC45/SKA1/KIF18B/ASPM/TYMS/CDC6/SPC24/HMMR/KIF2C/CDCA5/FN1/RAD54L/DEPDC1B/ESPL1/NEK2/GINS2/UHRF1/BUB1B/CDT1/CDKN3/CDK1/E2F1/KIFC1/EXO1/SPARC/CLSPN/ESCO2/ORC1/ITGB3/RAD51/TTK	covid
KINSEY_TARGETS_OF_EWSR1_FLII_FUSION_UP	KINSEY_TARGETS_OF_EWSR1_FLII_FUSION_UP	119	0.454695	2.04569	1.224e-07	3.31768e-06	2.52259e-06	249	tags=55%, list=29%, signal=45%	PLK1/BIRC5/RRM2/DLGAP5/CDC20/CENPA/MCM10/KIF4A/CEP55/MYBL2/CCNB2/TROAP/CDCA2/CAV1/SKA3/HJURP/NCAPG/PKMYT1/AURKB/TK1/CKAP2L/TOP2A/TPX2/MKI67/DTL/BUB1/MELK/GTSE1/FOXM1/TRIP13/CDC45/SKA1/KIF18B/ASPM/TYMS/CDC6/HMMR/KIF2C/CDCA5/ANLN/RAD54L/DEPDC1B/ESPL1/NEK2/GINS2/UHRF1/BUB1B/CDT1/CDKN3/SLCO4A1/CDK1/E2F1/EXO1/KIF14/ORC1/RAD51/TTK/TNS1/KIF15/CDCA3/SLC24A3/ZWINT/TEDC2/KIF11/CCNB1	covid
POOLA_INVASIVE_BREAST_CANCER_UP	POOLA_INVASIVE_BREAST_CANCER_UP	71	0.511542	2.18044	1.6923e-07	4.4694e-06	3.3983e-06	184	tags=52%, list=22%, signal=45%	IGHG1/IGHV3-20/IGLV3-10/IGHV4-34/IGKV1D-13/IGLV3-19/BIRC5/RRM2/DLGAP5/CCNA2/CDC20/CENPA/IGHV4-61/KIF20A/IGHV3-33/CEP55/CCNB2/IGHV3-23/NCAPG/TK1/TOP2A/TPX2/DTL/MELK/IGHV3-21/TRIP13/ASPM/TYMS/KIF2C/IGHV1-69/IGLV4-60/FN1/NEK2/GINS2/BUB1B/CDKN3/CDK1	covid
SHEDDEN_LUNG_CANCER_POOR_SURVIVAL_A6	SHEDDEN_LUNG_CANCER_POOR_SURVIVAL_A6	100	0.471456	2.08133	1.79873e-07	4.63173e-06	3.52173e-06	253	tags=57%, list=30%, signal=45%	BIRC5/RRM2/DLGAP5/CCNA2/CDC20/CENPA/UBE2C/MCM10/KIF4A/KIF20A/CEP55/MYBL2/CCNB2/TROAP/HJURP/NCAPG/AURKB/TK1/SHCBP1/TOP2A/TPX2/MKI67/DTL/BUB1/MELK/GTSE1/FOXM1/TNNT1/TRIP13/CDC45/SKA1/KIF18B/ASPM/TYMS/CDC6/HMMR/KIF2C/RAD54L/NEK2/GINS2/BUB1B/CDT1/CDKN3/CDK1/EXO1/KIF14/ORC1/TTK/H2BC9/KIF15/GGH/CDCA3/ZWINT/KIF11/ADM/CCNB1/APOBEC3B	covid
DUTERTRE_ESTRADIOL_RESPONSE_24HR_UP	DUTERTRE_ESTRADIOL_RESPONSE_24HR_UP	95	0.472486	2.07473	2.97348e-07	7.46996e-06	5.67976e-06	246	tags=57%, list=29%, signal=45%	PLK1/BIRC5/RRM2/DLGAP5/CCNA2/UBE2C/MCM10/KIF4A/CEP55/MYBL2/CCNB2/TROAP/CDCA2/SKA3/NCAPG/PKMYT1/AURKB/TK1/SHCBP1/TOP2A/TPX2/MKI67/DTL/BUB1/MELK/GTSE1/FOXM1/TRIP13/CDC45/ASPM/TYMS/CDC6/SPC24/KIF2C/CDCA5/ANLN/RAD54L/DEPDC1B/ESPL1/GINS2/UHRF1/BUB1B/CDT1/CDK1/E2F1/KIFC1/EXO1/CLSPN/ESCO2/RAD51/TTK/GGH/ZWINT/KIF11	covid
ODONNELL_TFRC_TARGETS_DN	ODONNELL_TFRC_TARGETS_DN	42	0.583578	2.32914	3.67803e-07	9.01994e-06	6.85829e-06	249	tags=74%, list=29%, signal=55%	PLK1/BIRC5/RRM2/DLGAP5/CCNA2/CDC20/CENPA/KIF4A/KIF20A/CEP55/MYBL2/AURKB/SHCBP1/CKAP2L/TOP2A/MKI67/BUB1/GTSE1/FOXM1/ASPM/CDC6/HMMR/ANLN/DEPDC1B/BUB1B/CDKN3/CDK1/KIF14/TTK/KIF11/CCNB1	covid
BASAKI_YBX1_TARGETS_UP	BASAKI_YBX1_TARGETS_UP	70	0.500828	2.12917	4.34254e-07	1.03668e-05	7.88236e-06	184	tags=53%, list=22%, signal=45%	PLK1/BIRC5/CCNA2/CDC20/CENPA/UBE2C/MCM10/KIF4A/KIF20A/CEP55/CCNB2/CAV1/HJURP/AURKB/TK1/SHCBP1/TPX2/MKI67/DTL/BUB1/MELK/GTSE1/TRIP13/ASPM/TYMS/CDC6/SPC24/KIF2C/ANLN/DEPDC1B/ESPL1/NEK2/GINS2/UHRF1/BUB1B/CDKN3/CDK1	covid
FISCHER_DREAM_TARGETS	FISCHER_DREAM_TARGETS	141	0.428297	1.95374	4.42853e-07	1.03668e-05	7.88236e-06	416	tags=76%, list=49%, signal=46%	PLK1/BIRC5/RRM2/DLGAP5/CCNA2/CDC20/CENPA/UBE2C/MCM10/KIF4A/KIF20A/CEP55/MYBL2/CCNB2/TROAP/CDCA2/SKA3/H1-5/HJURP/NCAPG/PKMYT1/AURKB/TK1/SHCBP1/CKAP2L/TOP2A/TPX2/MKI67/DTL/BUB1/MELK/GTSE1/FOXM1/TRIP13/CDC45/SKA1/KIF18B/ASPM/CDC6/SPC24/HMMR/KIF2C/CDCA5/ANLN/RAD54L/DEPDC1B/ESPL1/NEK2/GINS2/UHRF1/BUB1B/CDT1/CDKN3/CDK1/E2F1/KIFC1/EXO1/CLSPN/KIF14/ESCO2/ORC1/H4C8/RAD51/TTK/H2BC9/KIF15/GGH/CDCA3/H3C10/ZW…	covid
CAIRO_HEPATOBLASTOMA_CLASSES_UP	CAIRO_HEPATOBLASTOMA_CLASSES_UP	66	0.501776	2.11532	7.07724e-07	1.6199e-05	1.23169e-05	184	tags=53%, list=22%, signal=45%	PLK1/GLDC/BIRC5/RRM2/DLGAP5/CCNA2/CDC20/CENPA/UBE2C/MCM10/KIF4A/KIF20A/CCNB2/HJURP/NCAPG/AURKB/TOP2A/TPX2/MKI67/DTL/BUB1/GTSE1/TRIP13/KIF18B/ASPM/CDC6/HMMR/KIF2C/NEK2/GINS2/BUB1B/CDT1/CDKN3/SLCO4A1/CDK1	covid
GRAHAM_CML_DIVIDING_VS_NORMAL_QUIESCENT_UP	GRAHAM_CML_DIVIDING_VS_NORMAL_QUIESCENT_UP	81	0.475898	2.06	8.556e-07	1.9158e-05	1.45667e-05	253	tags=59%, list=30%, signal=46%	HBB/BIRC5/RRM2/DLGAP5/CCNA2/CDC20/CENPA/UBE2C/MCM10/KIF4A/KIF20A/CEP55/CCNB2/XK/KLF1/NCAPG/AURKB/TK1/TOP2A/TPX2/ITGA2B/BUB1/MELK/TRIP13/CDC45/KIF18B/ASPM/TYMS/CDC6/HMMR/KIF2C/ESPL1/NEK2/GINS2/BUB1B/CDKN3/CDK1/RNASE2/RAD51/TTK/KIF15/GGH/ZWINT/KIF11/PPBP/CCNB1/PROS1/APOBEC3B	covid
SMID_BREAST_CANCER_BASAL_UP	SMID_BREAST_CANCER_BASAL_UP	89	0.460678	2.00647	1.28758e-06	2.82172e-05	2.14549e-05	305	tags=64%, list=36%, signal=46%	IGHG1/IGLV3-10/IGHV4-34/IGKV1D-13/GLDC/BIRC5/DLGAP5/CCNA2/IL1R2/CDC20/CENPA/IGLC2/IGHV4-61/MCM10/IGHV3-33/CEP55/MYBL2/CCNB2/IGLV2-14/IGHV3-23/SHCBP1/TPX2/MKI67/BUB1/MELK/GTSE1/FOXM1/TRIP13/CDC45/KIF18B/ASPM/TYMS/IGHV1-69/RAD54L/NEK2/CDT1/LCN2/CDK1/KIFC1/EXO1/IGHV3-7/ORC1/TTK/GGH/CDCA3/ADM/APOBEC3B/CALD1/NT5DC2/MYLK/CENPF/TMEM158/CXCL5/TMCC2/ARNTL2/NCAPH/LTBP1	covid
LEE_EARLY_T_LYMPHOCYTE_UP	LEE_EARLY_T_LYMPHOCYTE_UP	50	0.530739	2.15093	1.33517e-06	2.86506e-05	2.17844e-05	249	tags=68%, list=29%, signal=51%	BIRC5/RRM2/DLGAP5/MZB1/CENPA/UBE2C/MCM10/KIF20A/CEP55/CCNB2/CDCA2/NCAPG/TOP2A/MKI67/DTL/BUB1/MELK/KIF18B/ASPM/TYMS/HMMR/KIF2C/NEK2/UHRF1/BUB1B/CDKN3/CDK1/KIF14/TTK/KIF15/GGH/CDCA3/KIF11/CCNB1	covid
MATTIOLI_MGUS_VS_PCL	MATTIOLI_MGUS_VS_PCL	28	0.620685	2.28929	1.75268e-06	3.68421e-05	2.80128e-05	247	tags=79%, list=29%, signal=58%	IGHG1/IGHV3-20/HBA1/IGLV3-10/IGLV3-25/IGHV4-34/IGKV1D-13/IGLV3-19/IGLC2/IGHV4-61/IGHV3-33/IGLV2-14/IGHV3-23/IGKV4-1/IGHV3-21/IGHV1-69/IGLV4-60/RNASE3/IGHV3-7/IGKV1D-8/IGHV3-72/PPBP	covid
CHEN_HOXA5_TARGETS_9HR_UP	CHEN_HOXA5_TARGETS_9HR_UP	14	-0.666269	-3.0748	2.10742e-06	4.34129e-05	3.30089e-05	223	tags=93%, list=26%, signal=70%	KLF5/TSC22D1/TRPC1/FEM1C/FOSB/DUSP8/CTH/CREM/ZNF14/TNFAIP3/ATF3/ZNF165/ZNF331	control
VECCHI_GASTRIC_CANCER_EARLY_UP	VECCHI_GASTRIC_CANCER_EARLY_UP	87	0.459207	1.99522	2.24052e-06	4.52497e-05	3.44055e-05	303	tags=64%, list=36%, signal=46%	BIRC5/RRM2/DLGAP5/CCNA2/CDC20/CENPA/UBE2C/MCM10/KIF4A/KIF20A/CEP55/MYBL2/CCNB2/CDCA2/SKA3/NCAPG/TK1/TOP2A/TPX2/MKI67/DTL/BUB1/MELK/GTSE1/FOXM1/TRIP13/KIF18B/ASPM/CDC6/HMMR/CDCA5/ANLN/DEPDC1B/NEK2/GINS2/UHRF1/BUB1B/CDKN3/LCN2/CDK1/SLC6A8/KIF14/ESCO2/TTK/KIF15/GGH/ZWINT/CCNB1/CENPF/IFITM3/NUF2/TMEM158/CXCL5/ISG15/IFI6/KNL1	covid
MARKEY_RB1_ACUTE_LOF_UP	MARKEY_RB1_ACUTE_LOF_UP	49	0.527328	2.13643	3.17463e-06	6.28821e-05	4.78122e-05	185	tags=55%, list=22%, signal=46%	IFI27/PLK1/BIRC5/RRM2/DLGAP5/CCNA2/CENPA/KIF4A/KIF20A/CCNB2/CAV1/HJURP/TK1/MKI67/DTL/BUB1/TRIP13/CDC45/TYMS/CDC6/KIF2C/ANLN/NEK2/CDT1/CDKN3/CDK1/E2F1	covid
NUYTTEN_EZH2_TARGETS_DN	NUYTTEN_EZH2_TARGETS_DN	104	0.440842	1.95273	3.35207e-06	6.51441e-05	4.95321e-05	249	tags=54%, list=29%, signal=43%	PLK1/BIRC5/RRM2/DLGAP5/CCNA2/CDC20/CENPA/UBE2C/MCM10/KIF4A/KIF20A/CEP55/CCNB2/TROAP/XK/SKA3/HJURP/AURKB/SHCBP1/CKAP2L/TOP2A/TPX2/PPARG/DTL/BUB1/GTSE1/FOXM1/CDC45/KIF18B/ASPM/TYMS/SPC24/HMMR/KIF2C/CDCA5/RAD54L/DEPDC1B/NEK2/GINS2/UHRF1/CDT1/CDKN3/CDK1/KIFC1/EXO1/TGFB1I1/CLSPN/KIF14/ESCO2/RAD51/TTK/KIF15/CDCA3/ZWINT/TEDC2/CCNB1	covid
ZHAN_MULTIPLE_MYELOMA_PR_UP	ZHAN_MULTIPLE_MYELOMA_PR_UP	25	0.636644	2.298	4.1001e-06	7.82055e-05	5.94634e-05	249	tags=84%, list=29%, signal=61%	BIRC5/RRM2/DLGAP5/UBE2C/MCM10/CCNB2/TOP2A/TPX2/FOXM1/TRIP13/SKA1/ASPM/TYMS/SPC24/DEPDC1B/NEK2/BUB1B/CDK1/KIF14/TTK/CCNB1	covid
FISCHER_G2_M_CELL_CYCLE	FISCHER_G2_M_CELL_CYCLE	65	0.483208	2.03384	6.31011e-06	0.000118171	8.98511e-05	281	tags=66%, list=33%, signal=48%	PLK1/BIRC5/CCNA2/CDC20/CENPA/UBE2C/KIF20A/CEP55/CCNB2/TROAP/CDCA2/HJURP/AURKB/SHCBP1/CKAP2L/TOP2A/TPX2/MKI67/BUB1/MELK/GTSE1/FOXM1/TRIP13/KIF18B/ASPM/HMMR/KIF2C/ANLN/DEPDC1B/ESPL1/NEK2/BUB1B/CDK1/KIFC1/KIF14/TTK/KIF15/CDCA3/KIF11/CCNB1/POLQ/CENPF/NUF2	covid
LINDGREN_BLADDER_CANCER_CLUSTER_3_UP	LINDGREN_BLADDER_CANCER_CLUSTER_3_UP	64	0.482489	2.02599	8.3492e-06	0.000152358	0.000115845	253	tags=59%, list=30%, signal=45%	ALAS2/PLK1/BIRC5/RRM2/DLGAP5/CENPA/UBE2C/KIF4A/CEP55/MYBL2/CCNB2/TK1/TOP2A/PYCR1/BUB1/MELK/TRIP13/CDC45/TYMS/CDC6/KIF2C/RAD54L/NEK2/GINS2/CDT1/CDK1/E2F1/KIFC1/EXO1/KIF14/ORC1/RAD51/GGH/H3C10/ZWINT/KIF11/CCNB1/APOBEC3B	covid
CHIANG_LIVER_CANCER_SUBCLASS_PROLIFERATION_UP	CHIANG_LIVER_CANCER_SUBCLASS_PROLIFERATION_UP	62	0.487514	2.03421	8.43146e-06	0.000152358	0.000115845	281	tags=65%, list=33%, signal=47%	BIRC5/DLGAP5/CCNA2/CDC20/UBE2C/KIF4A/KIF20A/CEP55/CCNB2/HJURP/AURKB/SHCBP1/CKAP2L/TOP2A/TPX2/MKI67/DTL/FOXM1/TRIP13/SKA1/KIF18B/ASPM/CDC6/KIF2C/CDCA5/ANLN/DEPDC1B/NEK2/BUB1B/CDKN3/CDK1/KIF14/TTK/ZWINT/KIF11/CCNB1/ELOVL7/NT5DC2/CENPF/NUF2	covid
SHEPARD_BMYB_TARGETS	SHEPARD_BMYB_TARGETS	24	0.610953	2.17507	1.24703e-05	0.000218161	0.000165878	249	tags=79%, list=29%, signal=58%	BIRC5/DLGAP5/CDC20/CDCA2/AURKB/TK1/TPX2/MKI67/MELK/GTSE1/FOXM1/ASPM/ANLN/CDK1/KIF14/TTK/CDCA3/KIF11/CCNB1	covid
KANG_DOXORUBICIN_RESISTANCE_UP	KANG_DOXORUBICIN_RESISTANCE_UP	34	0.571643	2.1861	1.24966e-05	0.000218161	0.000165878	184	tags=62%, list=22%, signal=50%	PLK1/BIRC5/RRM2/CDC20/CENPA/KIF4A/HJURP/NCAPG/TK1/TOP2A/TPX2/MKI67/BUB1/FOXM1/ASPM/TYMS/CDC6/HMMR/BUB1B/CDKN3/CDK1	covid
PUJANA_BRCA1_PCC_NETWORK	PUJANA_BRCA1_PCC_NETWORK	95	0.436192	1.91536	1.32604e-05	0.000227637	0.000173083	249	tags=54%, list=29%, signal=43%	KCNN3/PLK1/RRM2/DLGAP5/CCNA2/CDC20/CENPA/JCHAIN/UBE2C/MYBL2/CCNB2/TROAP/TNFRSF17/PKMYT1/AURKB/TK1/TOP2A/PYCR1/TPX2/MKI67/ITGA2B/BUB1/MELK/GTSE1/FOXM1/TRIP13/IGHV5-51/CDC45/SPTB/TYMS/CDC6/HMMR/KIF2C/RAD54L/ESPL1/NEK2/BUB1B/CDT1/CDKN3/CDK1/E2F1/KIFC1/EXO1/KIF14/ORC1/RAD51/TTK/GGH/ZWINT/KIF11/CCNB1	covid
GRAHAM_NORMAL_QUIESCENT_VS_NORMAL_DIVIDING_DN	GRAHAM_NORMAL_QUIESCENT_VS_NORMAL_DIVIDING_DN	48	0.516685	2.08338	1.49526e-05	0.000252478	0.000191971	253	tags=65%, list=30%, signal=48%	HBB/BIRC5/RRM2/DLGAP5/CCNA2/CDC20/MCM10/CEP55/CCNB2/XK/NCAPG/TK1/TOP2A/DTL/BUB1/MELK/TRIP13/CDC45/KIF18B/TYMS/CDC6/KIF2C/GINS2/BUB1B/CDKN3/CDK1/KIF15/GGH/ZWINT/KIF11/APOBEC3B	covid
TOYOTA_TARGETS_OF_MIR34B_AND_MIR34C	TOYOTA_TARGETS_OF_MIR34B_AND_MIR34C	47	0.511117	2.05849	1.8837e-05	0.000312937	0.000237941	249	tags=64%, list=29%, signal=48%	PLK1/RRM2/CCNA2/CENPA/KIF4A/MYBL2/CDCA2/PKMYT1/AURKB/SHCBP1/CKAP2L/MKI67/DTL/MELK/GTSE1/FOXM1/TRIP13/SKA1/SPC24/KIF2C/RAD54L/NEK2/BUB1B/KIFC1/CLSPN/KIF14/RAD51/KIF15/KIF11/CCNB1	covid
CROONQUIST_IL6_DEPRIVATION_DN	CROONQUIST_IL6_DEPRIVATION_DN	50	0.496171	2.01083	2.40663e-05	0.000393465	0.00029917	253	tags=64%, list=30%, signal=48%	PLK1/RRM2/CCNA2/CDC20/CENPA/UBE2C/MYBL2/CCNB2/AURKB/TK1/TOP2A/TPX2/MKI67/BUB1/FOXM1/TRIP13/CDC45/TYMS/CDC6/HMMR/KIF2C/BUB1B/CDKN3/CDK1/KIFC1/KIF14/H2BC11/GGH/ZWINT/KIF11/CCNB1/APOBEC3B	covid
MORI_IMMATURE_B_LYMPHOCYTE_DN	MORI_IMMATURE_B_LYMPHOCYTE_DN	35	0.541981	2.07901	2.48763e-05	0.000400352	0.000304407	249	tags=69%, list=29%, signal=50%	RRM2/DLGAP5/CCNA2/CDC20/CENPA/UBE2C/MCM10/CCNB2/HJURP/TOP2A/MKI67/DTL/MELK/CDC45/CDCA5/RAD54L/NEK2/CDKN3/CDK1/KIFC1/RAD51/TTK/CDCA3/CCNB1	covid
HOFFMANN_LARGE_TO_SMALL_PRE_BII_LYMPHOCYTE_UP	HOFFMANN_LARGE_TO_SMALL_PRE_BII_LYMPHOCYTE_UP	50	0.49439	2.00362	2.71992e-05	0.000431002	0.000327711	249	tags=62%, list=29%, signal=47%	RRM2/DLGAP5/CCNA2/CDC20/CENPA/UBE2C/MCM10/KIF4A/KIF20A/CCNB2/HJURP/AURKB/TK1/TOP2A/MKI67/BUB1/MELK/TRIP13/CDC45/KIF2C/CDCA5/ANLN/RAD54L/NEK2/CDKN3/CDK1/KIFC1/RAD51/TTK/CDCA3/CCNB1	covid
SHEDDEN_LUNG_CANCER_GOOD_SURVIVAL_A12	SHEDDEN_LUNG_CANCER_GOOD_SURVIVAL_A12	42	0.532246	2.12427	2.9472e-05	0.000459942	0.000349716	236	tags=60%, list=28%, signal=45%	ALAS2/IGHG1/IGHV3-20/IGHV4-34/IGKV1D-13/KCNN3/IGLV3-19/IGLC2/JCHAIN/IGHV4-61/IGHV3-33/IGHV3-73/TNFRSF17/IGHA1/IGHV3-23/IGKC/IGKV4-1/IGHV3-21/SPC24/IGHV1-69/IGHV3-7/TXNDC5/PCYT1B/IGKV3-20/IGHV3-72	covid
GAVIN_FOXP3_TARGETS_CLUSTER_P6	GAVIN_FOXP3_TARGETS_CLUSTER_P6	42	0.531497	2.12128	3.00556e-05	0.000462049	0.000351318	281	tags=74%, list=33%, signal=52%	PLK1/BIRC5/RRM2/CCNA2/CDC20/MCM10/KIF20A/CEP55/CCNB2/NCAPG/AURKB/TK1/TPX2/BUB1/ASPM/TYMS/SPC24/HMMR/KIF2C/CDCA5/RAD54L/NEK2/GINS2/BUB1B/CDK1/CLSPN/RAD51/CDCA3/CCNB1/CENPF/NUF2	covid
KONG_E2F3_TARGETS	KONG_E2F3_TARGETS	40	0.518713	2.04638	3.09324e-05	0.00046353	0.000352444	281	tags=70%, list=33%, signal=49%	PLK1/DLGAP5/CCNA2/CDC20/UBE2C/KIF20A/HJURP/NCAPG/TK1/SHCBP1/TOP2A/TPX2/MKI67/BUB1/MELK/TYMS/CDC6/HMMR/KIF2C/CDCA5/RAD54L/BUB1B/RAD51/CDCA3/KIF11/CCNB1/CENPF/NUF2	covid
WINNEPENNINCKX_MELANOMA_METASTASIS_UP	WINNEPENNINCKX_MELANOMA_METASTASIS_UP	49	0.493575	1.99968	3.11977e-05	0.00046353	0.000352444	281	tags=67%, list=33%, signal=48%	BIRC5/RRM2/DLGAP5/CENPA/CEP55/CCNB2/NCAPG/TK1/SHCBP1/TOP2A/BUB1/MELK/CDC45/KIF18B/ASPM/TYMS/CDC6/KIF2C/CDCA5/ANLN/RAD54L/NEK2/GINS2/UHRF1/CDKN3/CDK1/EXO1/ZWINT/KIF11/CCNB1/CTNNAL1/CENPF/NUF2	covid
WHITFIELD_CELL_CYCLE_LITERATURE	WHITFIELD_CELL_CYCLE_LITERATURE	27	0.5823	2.14014	3.1502e-05	0.00046353	0.000352444	185	tags=63%, list=22%, signal=51%	PLK1/BIRC5/RRM2/CCNA2/CDC20/CENPA/KIF20A/CCNB2/TOP2A/BUB1/CDC45/TYMS/CDC6/BUB1B/CDKN3/CDK1/E2F1	covid
SHEPARD_CRASH_AND_BURN_MUTANT_DN	SHEPARD_CRASH_AND_BURN_MUTANT_DN	34	0.557541	2.13217	3.47243e-05	0.000503023	0.000382472	249	tags=71%, list=29%, signal=52%	BIRC5/DLGAP5/CDC20/CEP55/CCNB2/CDCA2/AURKB/TK1/SHCBP1/TPX2/MKI67/MELK/GTSE1/FOXM1/ASPM/KIF2C/ANLN/BUB1B/CDK1/KIF14/TTK/CDCA3/KIF11/CCNB1	covid
YU_MYC_TARGETS_UP	YU_MYC_TARGETS_UP	15	0.683096	2.17296	3.51627e-05	0.000503023	0.000382472	184	tags=80%, list=22%, signal=64%	PLK1/BIRC5/KIF20A/CCNB2/TOP2A/MKI67/DTL/BUB1/ASPM/ANLN/CDKN3/CDK1	covid
BLANCO_MELO_COVID19_SARS_COV_2_LOW_MOI_INFECTION_A594_ACE2_EXPRESSING_CELLS_UP	BLANCO_MELO_COVID19_SARS_COV_2_LOW_MOI_INFECTION_A594_ACE2_EXPRESSING_CELLS_UP	17	-0.540317	-2.64232	3.67801e-05	0.000518952	0.000394584	95	tags=71%, list=11%, signal=64%	ZBTB10/PTX3/FOSB/DUSP8/CD200R1/TNF/TNFAIP3/IL23A/CCL4/NR4A3/ATF3/CD83	control
SALVADOR_MARTIN_PEDIATRIC_TBD_ANTI_TNF_THERAPY_NONRESPONDER_POST_TREATMENT_DN	SALVADOR_MARTIN_PEDIATRIC_TBD_ANTI_TNF_THERAPY_NONRESPONDER_POST_TREATMENT_DN	14	0.704682	2.20743	4.11243e-05	0.000572405	0.000435227	260	tags=100%, list=31%, signal=70%	IGHG1/IGHV4-59/IGKV1-12/IGKV3-15/IGHA1/IGKV1-5/IGLV1-44/IGKC/IGHV3-48/IGKV3-11/IGHV3-74/IGHV3-7/IGKV3-20/IGHG2	covid
BURTON_ADIPOGENESIS_PEAK_AT_24HR	BURTON_ADIPOGENESIS_PEAK_AT_24HR	18	0.651902	2.15966	4.53574e-05	0.000622908	0.000473627	187	tags=78%, list=22%, signal=62%	CCNA2/CDC20/UBE2C/KIF20A/AURKB/TK1/TOP2A/BUB1/MELK/HMMR/ANLN/LCN2/CDK1/KIFC1	covid
GAL_LEUKEMIC_STEM_CELL_DN	GAL_LEUKEMIC_STEM_CELL_DN	62	0.461311	1.92488	4.6653e-05	0.000632271	0.000480746	249	tags=58%, list=29%, signal=44%	PLK1/BIRC5/RRM2/CCNA2/CDC20/CENPA/IGLC2/KIF20A/CCNB2/NCAPG/SHCBP1/TOP2A/IGKC/ITGA2B/BUB1/MELK/GTSE1/CDC45/KIF18B/TYMS/CDC6/HMMR/ESPL1/GINS2/BUB1B/CDKN3/CDK1/E2F1/KIFC1/S100A12/ORC1/RNASE2/RAD51/TNS1/ZWINT/CCNB1	covid
ZHANG_RESPONSE_TO_IKK_INHIBITOR_AND_TNF_UP	ZHANG_RESPONSE_TO_IKK_INHIBITOR_AND_TNF_UP	25	-0.423838	-2.56422	4.90602e-05	0.00065626	0.000498986	125	tags=60%, list=15%, signal=53%	BTG2/IRF6/SEMA4C/GPR132/PTX3/HCAR3/TNFAIP3/IL23A/ATF3/LYPD3/ZNF165/CD83/IL1B/TNFAIP6/OLR1	control
CHEMNITZ_RESPONSE_TO_PROSTAGLANDIN_E2_UP	CHEMNITZ_RESPONSE_TO_PROSTAGLANDIN_E2_UP	36	0.529222	2.03987	5.63563e-05	0.000744192	0.000565844	194	tags=61%, list=23%, signal=49%	BIRC5/RRM2/DLGAP5/UBE2C/KIF20A/CCNB2/SKA3/HJURP/NCAPG/TK1/TOP2A/TPX2/MKI67/BUB1/GTSE1/CDC45/ASPM/CDC6/UHRF1/BUB1B/CDKN3/TGFB1I1	covid
TARTE_PLASMA_CELL_VS_PLASMABLAST_DN	TARTE_PLASMA_CELL_VS_PLASMABLAST_DN	44	0.497749	1.98935	6.04081e-05	0.000783135	0.000595455	249	tags=61%, list=29%, signal=46%	GLDC/RRM2/DLGAP5/CCNA2/CDC20/CENPA/UBE2C/TROAP/TOP2A/MKI67/FOXM1/TRIP13/TYMS/CDC6/HMMR/KIF2C/ESPL1/NEK2/CDKN3/CDK1/KIFC1/KIF14/ORC1/TTK/GGH/KIF11/CCNB1	covid
OSWALD_HEMATOPOIETIC_STEM_CELL_IN_COLLAGEN_GEL_UP	OSWALD_HEMATOPOIETIC_STEM_CELL_IN_COLLAGEN_GEL_UP	20	-0.467424	-2.51337	6.08261e-05	0.000783135	0.000595455	98	tags=75%, list=12%, signal=68%	BTG2/PTGER4/PTX3/FOSB/HCAR3/TNF/ALDH1A1/TNFAIP3/PLK2/CCL4/NR4A2/ATF3/CD83/IL1B/TNFAIP6	control
GOLDRATH_ANTIGEN_RESPONSE	GOLDRATH_ANTIGEN_RESPONSE	76	0.436736	1.8737	7.34844e-05	0.000934431	0.000710492	249	tags=51%, list=29%, signal=40%	ALAS2/IGHV1-69-2/IGHG1/PLK1/BIRC5/RRM2/DLGAP5/CCNA2/CDC20/CENPA/JCHAIN/MCM10/KIF4A/KIF20A/CCNB2/AURKB/TK1/TOP2A/MKI67/DTL/BUB1/GTSE1/TRIP13/CDC45/ASPM/TYMS/CDC6/KIF2C/CDCA5/ANLN/NEK2/CDKN3/CDK1/RAD51/TTK/GGH/CDCA3/KIF11/CCNB1	covid
PUJANA_CHEK2_PCC_NETWORK	PUJANA_CHEK2_PCC_NETWORK	66	0.452234	1.90647	7.65093e-05	0.000961032	0.000730718	249	tags=56%, list=29%, signal=43%	PLK1/RRM2/DLGAP5/CCNA2/CDC20/CENPA/UBE2C/MYBL2/CCNB2/TROAP/TNFRSF17/AURKB/TOP2A/TPX2/MKI67/BUB1/MELK/GTSE1/FOXM1/TRIP13/CDC45/TYMS/CDC6/HMMR/KIF2C/RAD54L/ESPL1/BUB1B/CDT1/CDK1/KIFC1/EXO1/KIF14/TTK/ZWINT/KIF11/CCNB1	covid
RAY_TUMORIGENESIS_BY_ERBB2_CDC25A_UP	RAY_TUMORIGENESIS_BY_ERBB2_CDC25A_UP	12	0.718235	2.13408	7.84737e-05	0.000973831	0.00074045	113	tags=67%, list=13%, signal=59%	RNASE1/DLGAP5/CENPA/KIF20A/CCNB2/SHCBP1/MKI67/DTL	covid
BLANCO_MELO_COVID19_SARS_COV_2_INFECTION_A594_ACE2_EXPRESSING_CELLS_UP	BLANCO_MELO_COVID19_SARS_COV_2_INFECTION_A594_ACE2_EXPRESSING_CELLS_UP	35	-0.330217	-2.43777	9.17992e-05	0.00112515	0.000855503	136	tags=54%, list=16%, signal=48%	ZBTB10/BTG2/NFE2L2/PTX3/FOSB/DUSP8/CD200R1/TNF/ZNF14/DCHS1/TNFAIP3/RND1/CCL4/NR4A3/ATF3/HES1/CD83/FILIP1L/ARL5B	control
ZHOU_CELL_CYCLE_GENES_IN_IR_RESPONSE_24HR	ZHOU_CELL_CYCLE_GENES_IN_IR_RESPONSE_24HR	45	0.493087	1.97219	9.2852e-05	0.00112515	0.000855503	189	tags=56%, list=22%, signal=46%	BIRC5/DLGAP5/CCNA2/CDC20/CENPA/UBE2C/KIF20A/CEP55/MYBL2/CCNB2/TOP2A/BUB1/MELK/TRIP13/ASPM/HMMR/ANLN/RAD54L/NEK2/UHRF1/CDKN3/CDK1/E2F1/KIFC1/EXO1	covid
BENPORATH_CYCLING_GENES	BENPORATH_CYCLING_GENES	106	0.400949	1.77925	9.62698e-05	0.001153	0.00087668	249	tags=50%, list=29%, signal=40%	SDC1/PLK1/BIRC5/RRM2/DLGAP5/CCNA2/CDC20/CENPA/UBE2C/CEP55/CCNB2/TROAP/HJURP/PKMYT1/AURKB/SHCBP1/TOP2A/TPX2/MKI67/DTL/BUB1/MELK/GTSE1/FOXM1/TRIP13/CDC45/TYMS/CDC6/HMMR/KIF2C/ANLN/RAD54L/DEPDC1B/ESPL1/NEK2/GINS2/UHRF1/BUB1B/CDKN3/E2F1/KIFC1/EXO1/CLSPN/KIF14/ORC1/ITGB3/H4C8/RAD51/TTK/CDCA3/ZWINT/KIF11/CCNB1	covid
MITSIADES_RESPONSE_TO_APLIDIN_DN	MITSIADES_RESPONSE_TO_APLIDIN_DN	42	0.510605	2.0379	0.000103807	0.00122898	0.000934451	178	tags=55%, list=21%, signal=46%	BIRC5/RRM2/DLGAP5/CCNA2/CENPA/KIF4A/MYBL2/HJURP/NCAPG/SHCBP1/TOP2A/TPX2/MKI67/BUB1/MELK/FOXM1/TRIP13/KIF18B/ASPM/TYMS/NEK2/BUB1B/CDT1	covid
REACTOME_CELL_CYCLE_MITOTIC	REACTOME_CELL_CYCLE_MITOTIC	88	0.418464	1.81743	0.000115638	0.00135348	0.00102912	321	tags=62%, list=38%, signal=43%	PLK1/BIRC5/RRM2/CCNA2/CDC20/CENPA/UBE2C/MCM10/KIF20A/MYBL2/CCNB2/NCAPG/PKMYT1/AURKB/TK1/TOP2A/TPX2/BUB1/GTSE1/FOXM1/CDC45/SKA1/TYMS/CDC6/SPC24/HMMR/KIF2C/CDCA5/ESPL1/NEK2/GINS2/BUB1B/CDT1/CDK1/E2F1/ESCO2/ORC1/H2BC11/H4C8/H2BC9/H3C10/ZWINT/CCNB1/CENPF/NUF2/H2AC8/H2BC5/POLE2/H2BC4/KNL1/NCAPH/H2BC8/H2AC6/PRKAR2B/CENPU	covid
FEVR_CTNNB1_TARGETS_DN	FEVR_CTNNB1_TARGETS_DN	58	0.457786	1.88918	0.000119089	0.00137822	0.00104793	189	tags=48%, list=22%, signal=40%	HBA2/HBB/BIRC5/RRM2/CCNA2/CDC20/KIF20A/CCNB2/AURKB/SHCBP1/TOP2A/MKI67/PPARG/BUB1/MELK/FOXM1/TRIP13/SKA1/TYMS/CDC6/RAD54L/BUB1B/CDT1/CDKN3/CDK1/E2F1/KIFC1/EXO1	covid
PUJANA_BRCA2_PCC_NETWORK	PUJANA_BRCA2_PCC_NETWORK	62	0.449362	1.87502	0.000130651	0.00149523	0.00113689	249	tags=56%, list=29%, signal=43%	RRM2/DLGAP5/CCNA2/CDC20/CENPA/UBE2C/MYBL2/CCNB2/TROAP/AURKB/TOP2A/TPX2/MKI67/BUB1/MELK/GTSE1/FOXM1/CDC45/TYMS/CDC6/HMMR/KIF2C/RAD54L/ESPL1/BUB1B/CDT1/CDKN3/CDK1/E2F1/KIFC1/KIF14/TTK/ZWINT/KIF11/CCNB1	covid
WONG_EMBRYONIC_STEM_CELL_CORE	WONG_EMBRYONIC_STEM_CELL_CORE	46	0.486058	1.94974	0.000135276	0.00152537	0.00115981	246	tags=61%, list=29%, signal=46%	PLK1/GLDC/BIRC5/RRM2/DLGAP5/CCNA2/CDC20/KIF4A/KIF20A/MYBL2/CCNB2/AURKB/TOP2A/DTL/BUB1/GTSE1/TRIP13/CDC6/CDCA5/NEK2/BUB1B/CDKN3/CDK1/EXO1/ORC1/TTK/CDCA3/KIF11	covid
GALINDO_IMMUNE_RESPONSE_TO_ENTEROTOXIN	GALINDO_IMMUNE_RESPONSE_TO_ENTEROTOXIN	11	-0.638296	-2.61055	0.000136247	0.00152537	0.00115981	236	tags=91%, list=28%, signal=66%	SCD/TSC22D1/LILRB4/GAPDH/IL18RAP/TNF/TNFAIP3/ERRFI1/CD83/IL1B	control
REACTOME_CELL_CYCLE	REACTOME_CELL_CYCLE	97	0.406058	1.78827	0.000159143	0.00176256	0.00134016	321	tags=61%, list=38%, signal=43%	PLK1/BIRC5/RRM2/CCNA2/CDC20/CENPA/UBE2C/MCM10/KIF20A/MYBL2/CCNB2/HJURP/NCAPG/PKMYT1/AURKB/TK1/TOP2A/TPX2/BUB1/GTSE1/FOXM1/CDC45/SKA1/TYMS/CDC6/SPC24/HMMR/KIF2C/CDCA5/ESPL1/NEK2/GINS2/BUB1B/CDT1/CDK1/E2F1/EXO1/CLSPN/ESCO2/ORC1/H2BC11/H4C8/RAD51/H2BC9/H3C10/ZWINT/CCNB1/CENPF/NUF2/H2AC8/H2BC5/POLE2/H2BC4/KNL1/NCAPH/H2BC8/H2AC6/PRKAR2B/CENPU	covid
BLUM_RESPONSE_TO_SALIRASIB_DN	BLUM_RESPONSE_TO_SALIRASIB_DN	74	0.429571	1.83645	0.000204939	0.00224561	0.00170745	246	tags=53%, list=29%, signal=41%	SDC1/PLK1/RRM2/CCNA2/CDC20/CENPA/UBE2C/KIF4A/KIF20A/MYBL2/CCNB2/TROAP/NCAPG/AURKB/TK1/TOP2A/TPX2/MKI67/BUB1/TRIP13/CDC45/TYMS/CDC6/HMMR/KIF2C/ESPL1/NEK2/GINS2/BUB1B/CDKN3/CDK1/E2F1/EXO1/ORC1/RAD51/TTK/KIF15/ZWINT/KIF11	covid
CASORELLI_ACUTE_PROMYELOCYTIC_LEUKEMIA_DN	CASORELLI_ACUTE_PROMYELOCYTIC_LEUKEMIA_DN	93	0.393858	1.72536	0.000225548	0.00244541	0.00185936	252	tags=51%, list=30%, signal=40%	PLK1/BIRC5/RRM2/DLGAP5/CCNA2/CDC20/CENPA/KIF4A/KIF20A/CEP55/CCNB2/KLF1/NCAPG/AURKB/TK1/TOP2A/MKI67/ITGA2B/MELK/GTSE1/FOXM1/TRIP13/CDC45/ASPM/TYMS/CDC6/HMMR/KIF2C/RAD54L/ESPL1/NEK2/GINS2/BUB1B/CDKN3/CDK1/KIFC1/ORC1/RNASE2/PCYT1B/TFPI/KIF15/ZWINT/TEDC2/KIF11/CCNB1/MMRN1/PROS1	covid
BURTON_ADIPOGENESIS_3	BURTON_ADIPOGENESIS_3	37	0.498979	1.9381	0.000258239	0.00277069	0.00210669	249	tags=62%, list=29%, signal=46%	PLK1/BIRC5/RRM2/DLGAP5/CDC20/MCM10/KIF4A/KIF20A/CCNB2/TK1/TOP2A/MKI67/DTL/BUB1/CDC45/TYMS/CDC6/KIF2C/CDK1/RAD51/TTK/KIF11/CCNB1	covid
WILCOX_RESPONSE_TO_PROGESTERONE_UP	WILCOX_RESPONSE_TO_PROGESTERONE_UP	33	0.512768	1.94629	0.000269847	0.00286538	0.00217869	155	tags=52%, list=18%, signal=44%	HBB/RRM2/DLGAP5/CDC20/KIF4A/KIF20A/CEP55/CCNB2/HJURP/NCAPG/TK1/SHCBP1/TOP2A/ASPM/TYMS/CDC6/HMMR	covid
WHITFIELD_CELL_CYCLE_G2_M	WHITFIELD_CELL_CYCLE_G2_M	37	0.495941	1.92629	0.000286669	0.00301294	0.00229088	281	tags=70%, list=33%, signal=49%	PLK1/BIRC5/DLGAP5/CCNA2/CENPA/CEP55/CCNB2/SHCBP1/TPX2/MKI67/BUB1/GTSE1/FOXM1/TRIP13/HMMR/KIF2C/ANLN/DEPDC1B/NEK2/BUB1B/KIF14/TTK/CDCA3/CCNB1/CENPF/NUF2	covid
ZWANG_CLASS_3_TRANSIENTLY_INDUCED_BY_EGF	ZWANG_CLASS_3_TRANSIENTLY_INDUCED_BY_EGF	23	-0.412373	-2.44309	0.000290086	0.00301806	0.00229478	53	tags=43%, list=6%, signal=42%	TNFAIP3/CRIP2/PLK2/NR4A3/NR4A2/ATF3/HES1/IL1B/ARL5B/OLR1	control
VILLANUEVA_LIVER_CANCER_KRT19_UP	VILLANUEVA_LIVER_CANCER_KRT19_UP	37	0.493404	1.91644	0.000324574	0.00334312	0.00254193	242	tags=62%, list=29%, signal=46%	DLGAP5/CDC20/MCM10/KIF4A/KIF20A/CEP55/TROAP/HJURP/NCAPG/CKAP2L/TOP2A/TPX2/MKI67/BUB1/MELK/KIF2C/ANLN/RAD54L/DEPDC1B/TTK/KIF15/CDCA3/ZWINT	covid
CROONQUIST_NRAS_SIGNALING_DN	CROONQUIST_NRAS_SIGNALING_DN	35	0.500562	1.92013	0.000424712	0.00433122	0.00329323	253	tags=66%, list=30%, signal=48%	PLK1/CCNA2/CDC20/CENPA/UBE2C/MYBL2/CCNB2/AURKB/TK1/TOP2A/TPX2/MKI67/FOXM1/TRIP13/CDC6/KIF2C/BUB1B/CDKN3/CDK1/ZWINT/KIF11/CCNB1/APOBEC3B	covid
SMID_BREAST_CANCER_LUMINAL_B_DN	SMID_BREAST_CANCER_LUMINAL_B_DN	61	0.429911	1.79266	0.000453323	0.00457596	0.00347932	122	tags=36%, list=14%, signal=33%	IGHG1/HBB/HBA1/IGLV3-10/IGLV3-25/IGHV4-34/IGKV1D-13/IGLV3-19/IL1R2/MZB1/IGLC2/JCHAIN/IGHV4-61/IGHV3-33/TNFRSF17/CAV1/IGHA1/IGLV2-14/IGHV3-23/IGKC/IGKV4-1/IGHV3-21	covid
FISCHER_DIRECT_P53_TARGETS_META_ANALYSIS	FISCHER_DIRECT_P53_TARGETS_META_ANALYSIS	16	-0.458484	-2.17991	0.000457596	0.00457596	0.00347932	467	tags=100%, list=55%, signal=46%	ACER2/CAVIN2/ETV7/PHLDA3/BCL2L1/TP53I3/GPC1/SERPINE1/APOBEC3H/ARHGAP42/MFAP3L/BTG2/PLK2/ATF3/HES1	control
RHODES_UNDIFFERENTIATED_CANCER	RHODES_UNDIFFERENTIATED_CANCER	26	0.541232	1.97331	0.000548373	0.00543101	0.00412945	249	tags=69%, list=29%, signal=50%	BIRC5/DLGAP5/CCNA2/CDC20/CENPA/UBE2C/MYBL2/TOP2A/MELK/FOXM1/TRIP13/CDC6/KIF2C/CDKN3/CDK1/KIF14/GGH/CCNB1	covid
LINDGREN_BLADDER_CANCER_CLUSTER_1_DN	LINDGREN_BLADDER_CANCER_CLUSTER_1_DN	70	0.425246	1.80785	0.000559628	0.00548968	0.00417407	253	tags=53%, list=30%, signal=40%	PLK1/BIRC5/RRM2/DLGAP5/MYL9/CENPA/UBE2C/KIF4A/MYBL2/CCNB2/CDCA2/TK1/TOP2A/PYCR1/BUB1/MELK/GTSE1/TRIP13/CDC45/CDC6/KIF2C/RAD54L/NEK2/GINS2/CDT1/CDK1/E2F1/KIFC1/EXO1/KIF14/ORC1/RAD51/ZWINT/PCSK6/KIF11/CCNB1/APOBEC3B	covid
LY_AGING_OLD_DN	LY_AGING_OLD_DN	16	0.608336	1.97161	0.000602506	0.00585453	0.00445148	277	tags=88%, list=33%, signal=60%	PLK1/CCNA2/CDC20/CENPA/UBE2C/MYBL2/PKMYT1/FOXM1/TYMS/KIF2C/KIF14/KIF11/CCNB1/CENPF	covid
GRAHAM_CML_QUIESCENT_VS_NORMAL_QUIESCENT_UP	GRAHAM_CML_QUIESCENT_VS_NORMAL_QUIESCENT_UP	29	0.520077	1.93885	0.000614261	0.00591298	0.00449592	410	tags=97%, list=48%, signal=52%	HBB/HBA1/RRM2/DLGAP5/CDC20/CEP55/CCNB2/XK/KLF1/TK1/TOP2A/ITGA2B/MELK/CDKN3/CDK1/KIF15/ZWINT/KIF11/APOBEC3B/CENPF/PF4/PRKAR2B/CENPU/H1-2/DHFR/CHEK1/CD38/GINS1	covid
BLANCO_MELO_COVID19_SARS_COV_2_INFECTION_CALU3_CELLS_UP	BLANCO_MELO_COVID19_SARS_COV_2_INFECTION_CALU3_CELLS_UP	38	-0.280593	-2.24622	0.000622929	0.0059409	0.00451715	621	tags=97%, list=73%, signal=27%	RSAD2/USP18/ISG15/CCL2/IFIT3/CAVIN2/IFIT1/SPRY2/MX1/CMPK2/ETV7/H1-3/MT2A/PLAAT2/OASL/FFAR2/IFI44/SERPINE1/EPSTI1/THBS1/ANKRD33B/XAF1/ZBTB10/PTGER4/PTX3/FOSB/DUSP8/CTH/TNF/TNFAIP3/IL23A/RND1/NR4A3/ATF3/LRRN3/TAGAP/IL1B	control
RUTELLA_RESPONSE_TO_HGF_VS_CSF2RB_AND_IL4_UP	RUTELLA_RESPONSE_TO_HGF_VS_CSF2RB_AND_IL4_UP	44	-0.241594	-2.08345	0.000756892	0.00715228	0.00543822	654	tags=100%, list=77%, signal=24%	S100A12/GGH/RSAD2/CXCL5/IFI6/TPST1/SLC1A3/VSIG4/CCL2/MS4A4A/EMP1/S100A9/C1QA/SDC2/FCGR1A/MAFB/CD163/MT2A/DHCR24/BHLHE41/CD63/SPHK1/TCEAL9/CTSD/PDIA5/TGM2/VNN1/SERPINE1/SCD/CCR1/FAH/EMILIN1/NRIP3/AQP9/TSC22D1/IL10/LILRB4/ABCC3/PLA2G7/NR4A2/CCRL2/IL1B/TNFAIP6	control
WHITEFORD_PEDIATRIC_CANCER_MARKERS	WHITEFORD_PEDIATRIC_CANCER_MARKERS	54	0.442512	1.81544	0.000845371	0.00791575	0.00601872	304	tags=65%, list=36%, signal=44%	BIRC5/RRM2/DLGAP5/CCNA2/CENPA/UBE2C/MYBL2/CCNB2/CDCA2/TK1/TOP2A/TPX2/MKI67/BUB1/MELK/CDC45/TYMS/CDCA5/ESPL1/NEK2/GINS2/UHRF1/CDK1/E2F1/KIF14/TTK/GGH/ZWINT/KIF11/CCNB1/POLQ/CENPF/NUF2/POLE2/NCAPH	covid
SASAKI_ADULT_T_CELL_LEUKEMIA	SASAKI_ADULT_T_CELL_LEUKEMIA	30	0.503157	1.88567	0.000919644	0.00846358	0.00643527	289	tags=70%, list=34%, signal=48%	PLK1/DLGAP5/CCNA2/UBE2C/CCNB2/CAV1/TK1/TOP2A/TPX2/MKI67/FOXM1/TYMS/KIF2C/BUB1B/CDKN3/KIF14/ZWINT/KIF11/CCNB1/CENPF/ISG15	covid
NAGASHIMA_NRG1_SIGNALING_UP	NAGASHIMA_NRG1_SIGNALING_UP	21	-0.381828	-2.14689	0.000927652	0.00846358	0.00643527	86	tags=52%, list=10%, signal=48%	FOSB/CXCR4/DUSP8/EPPK1/CTH/NR4A3/NR4A2/ATF3/HES1/LYPD3/ZNF331	control
CROONQUIST_NRAS_VS_STROMAL_STIMULATION_DN	CROONQUIST_NRAS_VS_STROMAL_STIMULATION_DN	34	0.493726	1.88813	0.000928529	0.00846358	0.00643527	253	tags=62%, list=30%, signal=45%	DLGAP5/CCNA2/CDC20/CENPA/UBE2C/CCNB2/TROAP/AURKB/TK1/TPX2/MKI67/FOXM1/CDC45/CDC6/KIF2C/CDKN3/CDK1/SPARC/H2BC11/CCNB1/APOBEC3B	covid
RUIZ_TNC_TARGETS_DN	RUIZ_TNC_TARGETS_DN	43	0.458806	1.83072	0.000976055	0.00881874	0.00670531	189	tags=51%, list=22%, signal=42%	BIRC5/RRM2/CCNA2/UBE2C/MCM10/CAV1/HJURP/AURKB/SHCBP1/DTL/MELK/FOXM1/TRIP13/CDC45/TYMS/CDC6/KIF2C/RAD54L/GINS2/CDK1/E2F1/EXO1	covid
FOURNIER_ACINAR_DEVELOPMENT_LATE_2	FOURNIER_ACINAR_DEVELOPMENT_LATE_2	44	0.447925	1.79022	0.00106232	0.00949207	0.00721727	275	tags=59%, list=32%, signal=42%	PLK1/BIRC5/RRM2/CENPA/KIF4A/HJURP/DTL/MELK/FOXM1/TRIP13/CDC45/ASPM/CDC6/KIF2C/FN1/GINS2/CDKN3/CDK1/TXNDC5/TTK/CDCA3/ZWINT/TNFRSF12A/NT5DC2/POLQ/ITGB5	covid
ALCALAY_AML_BY_NPM1_LOCALIZATION_DN	ALCALAY_AML_BY_NPM1_LOCALIZATION_DN	45	0.457958	1.83168	0.00106901	0.00949207	0.00721727	416	tags=87%, list=49%, signal=47%	BIRC5/RRM2/DLGAP5/CCNA2/IL1R2/CDC20/UBE2C/MCM10/KIF4A/CCNB2/TK1/SHCBP1/TPX2/MKI67/FOXM1/TYMS/CDC6/HMMR/KIF2C/CDKN3/KIFC1/EXO1/SPARC/EGFL7/CCNB1/RSAD2/POLE2/NCAPH/ANK1/CD34/RHD/KIF23/ITM2C/ITGA9/MCM2/DHFR/CHEK1/CD38/MCM4	covid
FARMER_BREAST_CANCER_CLUSTER_2	FARMER_BREAST_CANCER_CLUSTER_2	20	0.576932	1.97109	0.00111114	0.00978181	0.00743757	246	tags=75%, list=29%, signal=55%	CCNA2/CENPA/KIF4A/KIF20A/CEP55/CCNB2/NCAPG/TPX2/BUB1/MELK/ASPM/NEK2/BUB1B/KIF15/KIF11	covid
BLANCO_MELO_COVID19_SARS_COV_2_INFECTION_A594_ACE2_EXPRESSING_CELLS_RUXOLITINIB_UP	BLANCO_MELO_COVID19_SARS_COV_2_INFECTION_A594_ACE2_EXPRESSING_CELLS_RUXOLITINIB_UP	29	-0.315341	-2.13393	0.00117301	0.0101889	0.00774713	136	tags=55%, list=16%, signal=48%	ZBTB10/BTG2/ZNF543/PTX3/FOSB/CD200R1/TNF/ZNF14/DCHS1/TNFAIP3/NR4A3/ATF3/HES1/CD83/FILIP1L/ARL5B	control
SMID_BREAST_CANCER_RELAPSE_IN_BONE_DN	SMID_BREAST_CANCER_RELAPSE_IN_BONE_DN	34	0.4884	1.86776	0.00117717	0.0101889	0.00774713	117	tags=41%, list=14%, signal=37%	IGHG1/IGLV3-10/IGLV3-25/IGHV4-34/IGKV1D-13/IGLV3-19/GLDC/IL1R2/IGLC2/IGHV4-61/IGHV3-33/IGLV2-14/IGHV3-23/IGKV4-1	covid
TIEN_INTESTINE_PROBIOTICS_24HR_UP	TIEN_INTESTINE_PROBIOTICS_24HR_UP	50	0.427639	1.7331	0.00130483	0.0111998	0.00851574	304	tags=62%, list=36%, signal=42%	PLK1/GLDC/RRM2/DLGAP5/CCNA2/CENPA/KIF20A/HJURP/TK1/SHCBP1/BUB1/GTSE1/FOXM1/TRIP13/TYMS/HMMR/ESPL1/GINS2/BUB1B/CDKN3/KIF14/GGH/ZWINT/KIF11/ADM/CCNB1/APOBEC3B/CALD1/CENPF/POLE2/NCAPH	covid
INGRAM_SHH_TARGETS_UP	INGRAM_SHH_TARGETS_UP	10	-0.60751	-2.41553	0.00131989	0.0112354	0.00854281	242	tags=90%, list=29%, signal=65%	FEN1/THBD/MFAP3L/PLAC8/PMP22/NFE2L2/HES1/FILIP1L/NOG	control
BLUM_RESPONSE_TO_SALIRASIB_UP	BLUM_RESPONSE_TO_SALIRASIB_UP	11	-0.550239	-2.25041	0.00144323	0.0121846	0.00926453	388	tags=100%, list=46%, signal=55%	PHGDH/ELL2/BCL2L1/SPHK1/CTSD/HSP90B1/PTX3/CTH/TNFAIP3/ATF3	control
MARTINEZ_RB1_AND_TP53_TARGETS_DN	MARTINEZ_RB1_AND_TP53_TARGETS_DN	21	0.544955	1.88261	0.0015217	0.0126818	0.00964255	313	tags=81%, list=37%, signal=52%	PLK1/CENPA/MYBL2/GPRC5D/CLU/HJURP/MKI67/PLXNB3/TNNT1/TRIP13/SNCA/CALD1/CTNNAL1/USP18/H2BC5/LTBP1/IGFBP2	covid
REACTOME_SIGNALING_BY_GPCR	REACTOME_SIGNALING_BY_GPCR	37	-0.245188	-1.96609	0.00152674	0.0126818	0.00964255	602	tags=97%, list=71%, signal=29%	PPBP/ADM/PDE2A/CXCL5/PF4/NTSR1/PRKAR2B/RGS6/ADRA2A/CCL2/GNG11/F2RL3/SUCNR1/GNAZ/FFAR2/MGLL/GPR27/ARHGEF12/FZD5/CCR1/PROK2/DGKK/PTGDR2/XCL1/PTGER4/GPR132/CXCR4/HCAR3/GPR20/HTR6/ADGRE3/CCL4/GPR18/HCAR2/CCRL2/CYSLTR2	control
SARRIO_EPITHELIAL_MESENCHYMAL_TRANSITION_UP	SARRIO_EPITHELIAL_MESENCHYMAL_TRANSITION_UP	58	0.417118	1.72135	0.00160522	0.0131557	0.0100029	254	tags=53%, list=30%, signal=40%	PLK1/RRM2/CCNA2/CENPA/KIF20A/CEP55/SKA3/PKMYT1/TOP2A/MKI67/DTL/BUB1/FOXM1/CDC45/ASPM/TYMS/CDC6/HMMR/CDCA5/ANLN/ESPL1/UHRF1/BUB1B/CDK1/E2F1/EXO1/RAD51/ZWINT/KIF11/CCNB1/TNFRSF12A	covid
TANG_SENESCENCE_TP53_TARGETS_DN	TANG_SENESCENCE_TP53_TARGETS_DN	26	0.52211	1.90359	0.00160934	0.0131557	0.0100029	184	tags=58%, list=22%, signal=47%	BIRC5/CCNA2/CDC20/CENPA/UBE2C/KIF4A/KIF20A/CCNB2/AURKB/TK1/TOP2A/TPX2/BUB1/NEK2/CDK1	covid
ACEVEDO_LIVER_TUMOR_VS_NORMAL_ADJACENT_TISSUE_DN	ACEVEDO_LIVER_TUMOR_VS_NORMAL_ADJACENT_TISSUE_DN	11	-0.539474	-2.20638	0.00178127	0.0144465	0.0109844	397	tags=100%, list=47%, signal=54%	SLC25A37/MYOM2/PHGDH/MT2A/CTSD/VNN1/LY6E/STAB1/FOSB/NR4A2	control
COLINA_TARGETS_OF_4EBP1_AND_4EBP2	COLINA_TARGETS_OF_4EBP1_AND_4EBP2	42	0.458116	1.82841	0.00180881	0.0145552	0.011067	289	tags=62%, list=34%, signal=43%	PLK1/BIRC5/DLGAP5/CCNA2/CDC20/KIF20A/AURKB/TOP2A/TPX2/MELK/FOXM1/HMMR/KIF2C/ANLN/ESPL1/NEK2/CDT1/LCN2/RAD51/TTK/TFPI/CCNB1/USP18/IFITM3/NUF2/ISG15	covid
KRIGE_RESPONSE_TO_TOSEDOSTAT_6HR_UP	KRIGE_RESPONSE_TO_TOSEDOSTAT_6HR_UP	38	-0.257055	-2.05779	0.00194117	0.0154993	0.0117849	529	tags=92%, list=62%, signal=36%	S100A8/MPO/TTC7B/CCL2/CTTN/CDC42BPA/H1-2/IFIT3/SUCNR1/S100A9/GRB10/FCGR1A/SLC38A5/MAFB/PSAT1/SLC25A37/PHGDH/MCEMP1/LGALS1/NME1/S100P/GPT2/ACSL1/CCDC71L/SEMA4C/TGIF1/TMEM52B/COLGALT2/PTGER4/IL18RAP/CTH/ERRFI1/ATF3/FILIP1L/TAGAP	control
LY_AGING_MIDDLE_DN	LY_AGING_MIDDLE_DN	12	0.632563	1.87953	0.00196926	0.0156026	0.0118634	277	tags=92%, list=33%, signal=63%	PLK1/CCNA2/CDC20/CENPA/UBE2C/MYBL2/FOXM1/KIF2C/KIF11/CCNB1/CENPF	covid
REACTOME_M_PHASE	REACTOME_M_PHASE	53	0.427673	1.75331	0.00211121	0.016584	0.0126096	395	tags=77%, list=47%, signal=44%	PLK1/BIRC5/CDC20/CENPA/UBE2C/KIF20A/CCNB2/NCAPG/AURKB/BUB1/SKA1/SPC24/KIF2C/CDCA5/ESPL1/NEK2/BUB1B/CDK1/H2BC11/H4C8/H2BC9/H3C10/ZWINT/CCNB1/CENPF/NUF2/H2AC8/H2BC5/H2BC4/KNL1/NCAPH/H2BC8/H2AC6/PRKAR2B/CENPU/CDCA8/KIF23/SGO1/H2BC21/CENPE/TUBB1	covid
PID_FOXM1_PATHWAY	PID_FOXM1_PATHWAY	13	0.61959	1.89069	0.00213795	0.016584	0.0126096	277	tags=85%, list=33%, signal=58%	PLK1/BIRC5/CCNA2/CENPA/CCNB2/AURKB/FOXM1/NEK2/CDK1/CCNB1/CENPF	covid
REACTOME_G1_S_SPECIFIC_TRANSCRIPTION	REACTOME_G1_S_SPECIFIC_TRANSCRIPTION	12	0.630562	1.87358	0.00214143	0.016584	0.0126096	210	tags=75%, list=25%, signal=57%	RRM2/TK1/CDC45/TYMS/CDC6/CDT1/CDK1/E2F1/ORC1	covid
REACTOME_MITOTIC_G2_G2_M_PHASES	REACTOME_MITOTIC_G2_G2_M_PHASES	19	0.550939	1.85426	0.00253641	0.0194963	0.0148239	185	tags=63%, list=22%, signal=50%	PLK1/CCNA2/MYBL2/CCNB2/PKMYT1/TPX2/GTSE1/FOXM1/HMMR/NEK2/CDK1/E2F1	covid
RASHI_RESPONSE_TO_IONIZING_RADIATION_6	RASHI_RESPONSE_TO_IONIZING_RADIATION_6	11	0.63417	1.84603	0.00265329	0.0202436	0.0153922	118	tags=55%, list=14%, signal=48%	IGHV1-69-2/IGHG1/RNASE1/IL1R2/IGHV3-23/IGKV1-27	covid
MCLACHLAN_DENTAL_CARIES_UP	MCLACHLAN_DENTAL_CARIES_UP	42	0.448431	1.78975	0.00278913	0.0211236	0.0160613	159	tags=40%, list=19%, signal=35%	IGHG1/RNASE1/HBB/IGHV3-20/IGKV1D-13/MZB1/IGLC2/JCHAIN/IGHV4-61/IGHA1/IGLV2-14/IGHV3-23/IGKC/IGKV4-1/IGHV3-21/C1QB/IGHV1-69	covid
MISSIAGLIA_REGULATED_BY_METHYLATION_DN	MISSIAGLIA_REGULATED_BY_METHYLATION_DN	32	0.474675	1.79633	0.00285466	0.021462	0.0163186	202	tags=56%, list=24%, signal=45%	DLGAP5/CCNA2/UBE2C/CAV1/TK1/MKI67/FOXM1/CDC45/TYMS/CDC6/ESPL1/NEK2/BUB1B/CDT1/CDKN3/CDK1/KIFC1/KIF14	covid
ZHOU_CELL_CYCLE_GENES_IN_IR_RESPONSE_6HR	ZHOU_CELL_CYCLE_GENES_IN_IR_RESPONSE_6HR	34	0.46975	1.79644	0.00301995	0.0225402	0.0171384	246	tags=59%, list=29%, signal=43%	DLGAP5/CCNA2/CENPA/KIF20A/CEP55/MYBL2/DTL/TRIP13/CDCA5/RAD54L/NEK2/GINS2/UHRF1/CDT1/E2F1/KIFC1/EXO1/RAD51/TTK/KIF11	covid
PATIL_LIVER_CANCER	PATIL_LIVER_CANCER	77	0.381063	1.63759	0.00315745	0.0233969	0.0177898	203	tags=43%, list=24%, signal=36%	PLK1/RRM2/DLGAP5/CCNA2/UBE2C/CEP55/MYBL2/TROAP/HJURP/PKMYT1/TK1/TOP2A/TPX2/OSBP2/PPARG/DTL/BUB1/FOXM1/TRIP13/CDC45/TYMS/CDC6/HMMR/CDCA5/DEPDC1B/ESPL1/NEK2/CDKN3/LCN2/CDK1/E2F1/SPARC/ESCO2	covid
BERENJENO_TRANSFORMED_BY_RHOA_UP	BERENJENO_TRANSFORMED_BY_RHOA_UP	76	0.381727	1.6377	0.00319482	0.0235047	0.0178718	249	tags=47%, list=29%, signal=37%	BIRC5/DLGAP5/CCNA2/CDC20/CENPA/MCM10/KIF4A/KIF20A/MYBL2/AURKB/TK1/TOP2A/MKI67/DTL/BUB1/GTSE1/FOXM1/TRIP13/CDC45/ASPM/TYMS/CDC6/KIF2C/CDCA5/ANLN/NEK2/UHRF1/CDK1/E2F1/EXO1/ORC1/RAD51/TTK/KIF11/ADM/CCNB1	covid
LINDSTEDT_DENDRITIC_CELL_MATURATION_A	LINDSTEDT_DENDRITIC_CELL_MATURATION_A	10	-0.567751	-2.25744	0.00325676	0.0236824	0.0180068	139	tags=80%, list=16%, signal=68%	PLA2G7/PTGER4/HCAR3/CREM/TNF/RTN1/CCL4/IL1B	control
SHEN_SMARCA2_TARGETS_DN	SHEN_SMARCA2_TARGETS_DN	16	0.560614	1.81695	0.00326495	0.0236824	0.0180068	185	tags=56%, list=22%, signal=45%	ALAS2/BIRC5/CENPA/MYBL2/TROAP/OSBP2/SPTB/ESPL1/E2F1	covid
WU_APOPTOSIS_BY_CDKN1A_VIA_TP53	WU_APOPTOSIS_BY_CDKN1A_VIA_TP53	23	0.51777	1.82576	0.00337521	0.0243109	0.0184847	249	tags=65%, list=29%, signal=47%	DLGAP5/UBE2C/CEP55/NCAPG/AURKB/TPX2/MKI67/BUB1/ASPM/TYMS/ANLN/CDK1/EXO1/TTK/CCNB1	covid
SHEPARD_BMYB_MORPHOLINO_DN	SHEPARD_BMYB_MORPHOLINO_DN	40	0.433671	1.71088	0.00343724	0.0245858	0.0186937	249	tags=55%, list=29%, signal=41%	BIRC5/DLGAP5/CDC20/CDCA2/AURKB/TK1/TPX2/MKI67/MELK/GTSE1/FOXM1/ASPM/CDC6/ANLN/GINS2/UHRF1/CDK1/KIF14/TTK/CDCA3/KIF11/CCNB1	covid
NUYTTEN_NIPP1_TARGETS_UP	NUYTTEN_NIPP1_TARGETS_UP	46	-0.221675	-2.0019	0.0036904	0.0262146	0.0199322	638	tags=98%, list=75%, signal=26%	H2BC11/IFI44L/H2BC9/PROS1/SPOCD1/RSAD2/CALD1/TMEM158/ISG15/H2BC5/IFI6/MT1E/FHL2/SLC1A3/H2AC6/TTC7B/H1-2/ITM2C/H2BC21/GRB10/MX1/SPATS2L/H1-4/IFI27L1/ELL2/MT2A/OASL/H2BC12/LHFPL6/IFI44/TGM2/VNN1/SERPINE1/LGALSL/EPSTI1/YOD1/XAF1/KBTBD8/BBS10/MLF1/ZNF419/CREM/TNFAIP3/ATF3/ARL5B	control
CUI_TCF21_TARGETS_2_DN	CUI_TCF21_TARGETS_2_DN	45	-0.224303	-2.02334	0.00384558	0.0271298	0.0206281	601	tags=96%, list=71%, signal=29%	ADM/PROS1/PDE2A/ITGB5/TMCC2/HTRA1/H1-2/SH3BGRL2/MSRB3/ITGA9/ACER2/CAVIN2/CD38/SDC2/CABLES1/MMD/EHD3/MAFB/HLX/CTDSPL/MYOM2/CHAC2/ELL2/SEC11C/MGLL/MED12L/TDRP/GPC1/SCD/LGALSL/LIMS1/THBS1/THBD/YOD1/ANKRD33B/GIMAP8/TRPC1/MBLAC2/PTGER4/CXCR4/TNFAIP3/ADGRE3/CCRL2	control
REACTOME_CELL_CYCLE_CHECKPOINTS	REACTOME_CELL_CYCLE_CHECKPOINTS	55	0.40471	1.66433	0.00394287	0.0276269	0.0210061	321	tags=62%, list=38%, signal=41%	PLK1/BIRC5/CCNA2/CDC20/CENPA/UBE2C/MCM10/CCNB2/PKMYT1/AURKB/BUB1/GTSE1/CDC45/SKA1/CDC6/SPC24/KIF2C/BUB1B/CDK1/EXO1/CLSPN/ORC1/H2BC11/H4C8/H2BC9/ZWINT/CCNB1/CENPF/NUF2/H2BC5/H2BC4/KNL1/H2BC8/CENPU	covid
RUTELLA_RESPONSE_TO_HGF_UP	RUTELLA_RESPONSE_TO_HGF_UP	45	-0.222167	-2.00407	0.00399492	0.0278025	0.0211395	564	tags=71%, list=67%, signal=25%	MT2A/DHCR24/MGLL/BHLHE41/CD63/EBI3/SPHK1/TCEAL9/CTSD/TUBA1C/TGM2/VNN1/FZD5/SERPINE1/SCD/CCR1/FAH/EMILIN1/NRIP3/AQP9/TSC22D1/IL10/LILRB4/ABCC3/PLA2G7/CD209/NR4A3/LYPD3/FILIP1L/CCRL2/IL1B/TNFAIP6	control
TURASHVILI_BREAST_DUCTAL_CARCINOMA_VS_LOBULAR_NORMAL_UP	TURASHVILI_BREAST_DUCTAL_CARCINOMA_VS_LOBULAR_NORMAL_UP	10	0.645696	1.839	0.00406068	0.0280705	0.0213433	165	tags=70%, list=19%, signal=57%	TOP2A/DTL/MELK/ASPM/HMMR/ANLN/FN1	covid
PUJANA_XPRSS_INT_NETWORK	PUJANA_XPRSS_INT_NETWORK	30	0.471737	1.76792	0.00409714	0.0281337	0.0213914	187	tags=50%, list=22%, signal=40%	CCNA2/CDC20/CENPA/UBE2C/MYBL2/AURKB/TOP2A/MKI67/GTSE1/FOXM1/HMMR/RAD54L/ESPL1/CDK1/KIFC1	covid
MARTINEZ_TP53_TARGETS_DN	MARTINEZ_TP53_TARGETS_DN	21	0.519409	1.79436	0.00421405	0.0287448	0.0218561	313	tags=76%, list=37%, signal=49%	PLK1/CENPA/MYBL2/GPRC5D/CLU/HJURP/MKI67/PLXNB3/TNNT1/SNCA/CALD1/CTNNAL1/USP18/H2BC5/FHL2/IGFBP2	covid
BENPORATH_ES_1	BENPORATH_ES_1	44	0.416863	1.66607	0.00429137	0.0290797	0.0221107	210	tags=48%, list=25%, signal=38%	GLDC/BIRC5/RRM2/DLGAP5/CCNA2/CDC20/MCM10/KIF4A/AURKB/BUB1/TNNT1/CDC6/HMMR/KIF2C/CDCA5/GINS2/BUB1B/CDT1/CDK1/SLC6A8/ORC1	covid
WP_GPCRS_CLASS_A_RHODOPSINLIKE	WP_GPCRS_CLASS_A_RHODOPSINLIKE	17	-0.381787	-1.86706	0.00450266	0.030312	0.0230477	140	tags=59%, list=17%, signal=50%	GPR174/PTGDR2/PTGER4/CXCR4/HCAR3/GPR20/HTR6/GPR18/CCRL2/CYSLTR2	control
CHICAS_RB1_TARGETS_GROWING	CHICAS_RB1_TARGETS_GROWING	49	0.406194	1.64566	0.00458844	0.0304911	0.0231838	341	tags=65%, list=40%, signal=41%	CCNA2/CDC20/CENPA/KIF4A/KIF20A/CCNB2/CAV1/CLU/TOP2A/TPX2/BUB1/GTSE1/FOXM1/ASPM/HMMR/NEK2/GINS2/UHRF1/BUB1B/CDKN3/KIF14/TTK/CCNB1/APOBEC3B/PEAR1/MYLK/CENPF/POLE2/KNL1/NRGN/CDC42BPA/CDCA8	covid
NUYTTEN_EZH2_TARGETS_UP	NUYTTEN_EZH2_TARGETS_UP	53	-0.20478	-2.0044	0.00458846	0.0304911	0.0231838	577	tags=92%, list=68%, signal=31%	USP18/ITGB5/MT1E/SLC1A3/TTC7B/CTTN/ANK1/GAS6/ITM2C/MOXD1/GRB10/MX1/MAP1B/SPATS2L/EPHB2/GNAZ/MT2A/PLAAT2/OASL/MGLL/LHFPL6/NEXN/IFI44/SPHK1/TGM2/FZD5/SERPINE1/LGALSL/RAB27B/CCR1/EPSTI1/THBS1/YOD1/HSP90B1/XAF1/KBTBD8/IRF6/COLGALT2/PTX3/PPFIA4/CTH/TNFAIP3/PLK2/ERRFI1/ATF3/CD83/IL1B/NOG/ARL5B	control
AFFAR_YY1_TARGETS_DN	AFFAR_YY1_TARGETS_DN	51	0.413959	1.68434	0.00466428	0.0307962	0.0234158	249	tags=53%, list=29%, signal=40%	PLK1/BIRC5/CCNA2/CENPA/KIF20A/CCNB2/NCAPG/AURKB/TK1/SHCBP1/TOP2A/MKI67/BUB1/FOXM1/TRIP13/ASPM/CDC6/HMMR/KIF2C/UHRF1/BUB1B/CDT1/EXO1/TTK/CDCA3/KIF11/CCNB1	covid
REACTOME_RHO_GTPASE_EFFECTORS	REACTOME_RHO_GTPASE_EFFECTORS	47	0.415321	1.67268	0.00478636	0.031401	0.0238757	395	tags=77%, list=47%, signal=43%	PLK1/BIRC5/MYL9/CDC20/CENPA/AURKB/BUB1/SKA1/SPC24/KIF2C/BUB1B/KIF14/H2BC11/H4C8/H2BC9/H3C10/ZWINT/MYLK/CENPF/NUF2/H2AC8/H2BC5/H2BC4/KNL1/H2BC8/H2AC6/S100A8/CENPU/CTTN/CDCA8/SGO1/H2BC21/CIT/CENPE/S100A9/TUBB1	covid
ODONNELL_TARGETS_OF_MYC_AND_TFRC_DN	ODONNELL_TARGETS_OF_MYC_AND_TFRC_DN	19	0.529986	1.78374	0.00501759	0.0327096	0.0248707	184	tags=58%, list=22%, signal=46%	BIRC5/CCNA2/CDC20/MYBL2/AURKB/TOP2A/FOXM1/CDC6/DEPDC1B/BUB1B/CDK1	covid
ZHOU_INFLAMMATORY_RESPONSE_LIVE_UP	ZHOU_INFLAMMATORY_RESPONSE_LIVE_UP	31	-0.267372	-1.8338	0.00512346	0.0331897	0.0252357	257	tags=65%, list=30%, signal=47%	TDRP/SMTN/GPC1/SERPINE1/FCRL5/KLF5/IL10/ACSL1/BTG2/PTX3/OSM/ARL4D/TNF/TNFAIP3/IL23A/CCL4/NR4A3/CD83/CCRL2/IL1B	control
MOLENAAR_TARGETS_OF_CCND1_AND_CDK4_DN	MOLENAAR_TARGETS_OF_CCND1_AND_CDK4_DN	22	0.512728	1.79441	0.00545117	0.0350919	0.026682	158	tags=55%, list=19%, signal=46%	KIF4A/KIF20A/CEP55/CDCA2/HJURP/TPX2/DTL/MELK/TRIP13/CDC45/CDC6/KIF2C	covid
BOQUEST_STEM_CELL_UP	BOQUEST_STEM_CELL_UP	13	-0.396882	-1.78497	0.0056527	0.0361335	0.027474	517	tags=100%, list=61%, signal=40%	HTRA1/SDC2/MAFB/MEIS1/ANG/BHLHE41/PLBD1/CDKN2C/COL6A3/PTX3/ALDH1A1/TNFAIP6	control
JOHANSSON_GLIOMAGENESIS_BY_PDGFB_UP	JOHANSSON_GLIOMAGENESIS_BY_PDGFB_UP	10	0.632188	1.80053	0.00568314	0.0361335	0.027474	184	tags=70%, list=22%, signal=55%	PLK1/RRM2/CDC20/TOP2A/MKI67/FN1/CDK1	covid
STEIN_ESRRA_TARGETS	STEIN_ESRRA_TARGETS	17	-0.372289	-1.82061	0.005894	0.0372443	0.0283186	539	tags=100%, list=64%, signal=37%	PRKAR2B/CENPU/GAS6/MCM4/MAP1B/MAFB/ABCB9/AURKA/GAS2L1/FEN1/MANF/KANK2/ASPH/TRPC1/ZNF165/CD83	control
REACTOME_GPCR_LIGAND_BINDING	REACTOME_GPCR_LIGAND_BINDING	28	-0.270855	-1.83218	0.00603508	0.0379033	0.0288196	107	tags=46%, list=13%, signal=42%	PTGDR2/XCL1/PTGER4/GPR132/CXCR4/HCAR3/HTR6/ADGRE3/CCL4/GPR18/HCAR2/CCRL2/CYSLTR2	control
LASTOWSKA_NEUROBLASTOMA_COPY_NUMBER_UP	LASTOWSKA_NEUROBLASTOMA_COPY_NUMBER_UP	11	0.606182	1.76456	0.00634054	0.0395804	0.0300948	149	tags=55%, list=18%, signal=46%	BIRC5/TK1/TOP2A/PYCR1/KIF18B/CDC6	covid
KRIGE_RESPONSE_TO_TOSEDOSTAT_24HR_DN	KRIGE_RESPONSE_TO_TOSEDOSTAT_24HR_DN	31	-0.259329	-1.77863	0.00654378	0.040603	0.0308724	533	tags=94%, list=63%, signal=36%	PRKAR2B/MPO/NRGN/H1-2/SLC2A5/CABLES1/ACOT7/FCGR1A/SLC38A5/CENPW/MAD2L1/SLC25A39/MTURN/SEC11C/LAPTM4B/DHCR24/MGLL/FLT3/FABP5/SDF2L1/NME1/CENPM/SCD/LY6E/PRDX4/HSP90B1/COLGALT2/PTGER4/SLC19A2	control
MIKKELSEN_MEF_HCP_WITH_H3K27ME3	MIKKELSEN_MEF_HCP_WITH_H3K27ME3	13	-0.388754	-1.74841	0.00672162	0.0414236	0.0314964	428	tags=92%, list=51%, signal=46%	TAL1/SLC27A2/ALOX12/PLBD1/KCNA2/CDCP1/IRF6/KNDC1/SEZ6L/SLC47A1/NR4A3/LYPD3	control
KRIGE_RESPONSE_TO_TOSEDOSTAT_24HR_UP	KRIGE_RESPONSE_TO_TOSEDOSTAT_24HR_UP	33	-0.235194	-1.73949	0.00678684	0.0414236	0.0314964	529	tags=91%, list=62%, signal=36%	S100A8/TTC7B/CCL2/CTTN/CDC42BPA/IFIT3/SUCNR1/S100A9/SDC2/GRB10/MAFB/PSAT1/SLC25A37/PHGDH/MCEMP1/LGALS1/S100P/GPT2/ACSL1/CCDC71L/SEMA4C/TGIF1/TMEM52B/RBKS/IL18RAP/CTH/ERRFI1/ATF3/FILIP1L/TAGAP	control
DODD_NASOPHARYNGEAL_CARCINOMA_DN	DODD_NASOPHARYNGEAL_CARCINOMA_DN	137	0.333262	1.51474	0.00679669	0.0414236	0.0314964	304	tags=50%, list=36%, signal=38%	BIRC5/RRM2/DLGAP5/CCNA2/CENPA/UBE2C/MCM10/KIF4A/KIF20A/CEP55/CCNB2/CDCA2/CAV1/SKA3/HJURP/NCAPG/TK1/TOP2A/TPX2/MKI67/DTL/BUB1/MELK/FOXM1/CDC45/KIF18B/ASPM/TYMS/CDC6/HMMR/C1QB/KIF2C/CDCA5/ANLN/FN1/RAD54L/DEPDC1B/NEK2/GINS2/UHRF1/BUB1B/CDKN3/CDK1/E2F1/EXO1/SPARC/KIF14/ESCO2/RAD51/TTK/IFI44L/KIF15/ZWINT/PCSK6/KIF11/CCNB1/RSAD2/CALD1/POLQ/USP18/CENPF/SIGLEC1/NT5M/NUF2/ITGA1/POLE2/KNL1/NCAPH	covid
BENPORATH_PROLIFERATION	BENPORATH_PROLIFERATION	41	0.434998	1.72478	0.00693062	0.0419914	0.031928	222	tags=54%, list=26%, signal=42%	BIRC5/RRM2/CENPA/MYBL2/CCNB2/NCAPG/PKMYT1/TOP2A/DTL/BUB1/ASPM/TYMS/CDCA5/ANLN/RAD54L/NEK2/CDT1/CDKN3/CDK1/EXO1/RAD51/TTK	covid
ISHIDA_E2F_TARGETS	ISHIDA_E2F_TARGETS	27	0.473234	1.73929	0.00731352	0.0440522	0.033495	184	tags=52%, list=22%, signal=42%	RRM2/CCNA2/CDC20/CCNB2/AURKB/TK1/TOP2A/MKI67/BUB1/TRIP13/KIF2C/ANLN/CDT1/CDK1	covid
MANNE_COVID19_COMBINED_COHORT_VS_HEALTHY_DONOR_PLATELETS_UP	MANNE_COVID19_COMBINED_COHORT_VS_HEALTHY_DONOR_PLATELETS_UP	25	0.498917	1.80086	0.00761096	0.0455773	0.0346546	92	tags=32%, list=11%, signal=29%	IFI27/HBA2/ALAS2/HBB/HBA1/MZB1/JCHAIN/KLF1	covid
KARLSSON_TGFB1_TARGETS_DN	KARLSSON_TGFB1_TARGETS_DN	11	-0.47128	-1.92747	0.00772084	0.045968	0.0349517	342	tags=82%, list=40%, signal=49%	TGM2/NME1/CDKN2C/MGST1/CTSA/ID1/LY6E/ID3/DUSP8	control
WP_VITAMIN_D_RECEPTOR_PATHWAY	WP_VITAMIN_D_RECEPTOR_PATHWAY	13	-0.382494	-1.72026	0.00779229	0.0461268	0.0350724	529	tags=77%, list=62%, signal=29%	ASAP2/TNFSF4/CDKN2C/CDKN2A/ID1/CCNE1/THBD/PTGER4/TNFAIP3/HLA-DQA2	control
VERHAAK_GLIOBLASTOMA_MESENCHYMAL	VERHAAK_GLIOBLASTOMA_MESENCHYMAL	16	-0.365824	-1.73935	0.00791899	0.0466089	0.035439	544	tags=100%, list=64%, signal=36%	FHL2/MS4A4A/PLS3/MAFB/PLBD1/LGALS1/SERPINE1/THBS1/THBD/ACSL1/STAB1/CDCP1/RBKS/PTGER4/TNFAIP3	control
BLANCO_MELO_RESPIRATORY_SYNCYTIAL_VIRUS_INFECTION_A594_CELLS_UP	BLANCO_MELO_RESPIRATORY_SYNCYTIAL_VIRUS_INFECTION_A594_CELLS_UP	32	-0.260123	-1.89883	0.00796821	0.0466321	0.0354566	636	tags=100%, list=75%, signal=26%	IFI44L/SPOCD1/FSTL1/RSAD2/USP18/TMEM158/ARNTL2/CCL2/STRIP2/IFIT3/SERPING1/EMP1/IFIT1/MX1/ZBTB32/CMPK2/OASL/IFI44/TGM2/NRIP3/XAF1/CDCP1/PTGER4/PTX3/HCAR3/TNF/TNFAIP3/CCL4/HCAR2/ATF3/IL1B	control
FURUKAWA_DUSP6_TARGETS_PCI35_DN	FURUKAWA_DUSP6_TARGETS_PCI35_DN	24	0.481095	1.71276	0.00823699	0.0479327	0.0364455	113	tags=46%, list=13%, signal=41%	DLGAP5/CCNA2/CENPA/CEP55/CCNB2/HJURP/NCAPG/AURKB/SHCBP1/TPX2/DTL	covid
PEREZ_TP53_TARGETS	PEREZ_TP53_TARGETS	56	-0.186378	-1.74945	0.00860747	0.0498073	0.0378708	617	tags=95%, list=73%, signal=28%	TNS1/ADM/APOBEC3B/PEAR1/TP73/TMEM40/USP18/ARHGAP6/ISG15/TMCC2/SEC14L5/FAXDC2/H2BC8/ANK1/HMGB3/GNG11/C2orf88/IFIT3/ITGA9/MOXD1/H2BC21/H2AC11/IFIT1/MX1/TRIM7/MAFB/RIPOR3/CMPK2/ETV7/CNKSR1/GATA2/KCP/FRMD3/TOX2/DYNC2I2/TP53I3/FECH/GPT2/MARCHF2/XAF1/ZNF600/BTG2/ZNF284/COL18A1/ZNF702P/KNDC1/EPPK1/EDAR/KLRK1-AS1/SLC47A1/CRIP2/ZNF304/NRARP	control
